# Supplementary material for: Rh(I)-catalyzed intramolecular [2 + 2 + 1] cycloaddition of allenenes: Construction of bicyclo[4.3.0]nonenones with an angular methyl group and tricyclo[6.4.0.01,5]dodecenone
Source: publisher site journal article supplement (doi:10.3762/bjoc.7.52), 2011-04-07

# Supporting Information

for

## **Rh(I)-catalyzed intramolecular [2 + 2 + 1] cycloaddition of allenenes: Construction of bicyclo[4.3.0]nonenones with an angular methyl group and tricyclo[6.4.0.0<sup>1,5</sup>]dodecenone**

Fuyuhiko Inagaki, Naoya Itoh, Yujiro Hayashi, Yumi Matsui and Chisato Mukai\*

Address: Division of Pharmaceutical Sciences, Graduate School of Natural Science and Technology, Kanazawa University, Kakuma-machi, Kanazawa 920-1192, Japan

Email: Chisato Mukai - cmukai@kenroku.kanazawa-u.ac.jp

\* Corresponding author

### **Experimental, characterization data and spectra**

#### **Table of contents**

|                                                                                                                |        |
|----------------------------------------------------------------------------------------------------------------|--------|
| General .....                                                                                                  | S2     |
| Preparation and characterization data for compounds <b>7a–f</b> .....                                          | S2–7   |
| Reference for compounds <b>1a, 1b, 7g, 13, 15, 17</b> and <b>19</b> .....                                      | S7     |
| Preparation and characterization data for compounds <b>8a,b</b> and <b>9a–f</b> .....                          | S8–10  |
| Reference for compounds <b>2a,b</b> .....                                                                      | S10    |
| Preparation and characterization data for compound <b>9g, 24</b> and <b>10</b> .....                           | S11–12 |
| Reference for compounds <b>23, 25</b> .....                                                                    | S13    |
| Preparation and characterization data for compounds <b>11, 12</b> .....                                        | S13    |
| <sup>1</sup> H NMR spectra and <sup>13</sup> C NMR spectra for compounds <b>7a–f</b> .....                     | S14–25 |
| <sup>1</sup> H NMR spectra and <sup>13</sup> C NMR spectra for compounds <b>8a,b</b> and <b>9a–g</b> .....     | S26–41 |
| <sup>1</sup> H NMR spectra and <sup>13</sup> C NMR spectra for compounds <b>24, 10, 11</b> and <b>12</b> ..... | S42–49 |

**General.** Melting points are uncorrected. IR spectra were measured in  $\text{CHCl}_3$ .  $^1\text{H}$  NMR spectra were taken in  $\text{CDCl}_3$  except for the compound **9e** ( $(\text{CD}_3)_2\text{CO}$ ).  $\text{CHCl}_3$  (7.26 ppm) for silyl compounds and tetramethylsilane (0.00 ppm) for compounds without a silyl group were used as internal standards unless otherwise stated.  $^{13}\text{C}$  NMR spectra were recorded in  $\text{CDCl}_3$  with  $\text{CDCl}_3$  (77.00 ppm) as an internal standard unless otherwise stated. All reactions were carried out under a nitrogen atmosphere. Silica gel (silica gel 60, 230–400 mesh) was used for chromatography. Organic extracts were dried over anhydrous  $\text{Na}_2\text{SO}_4$ .

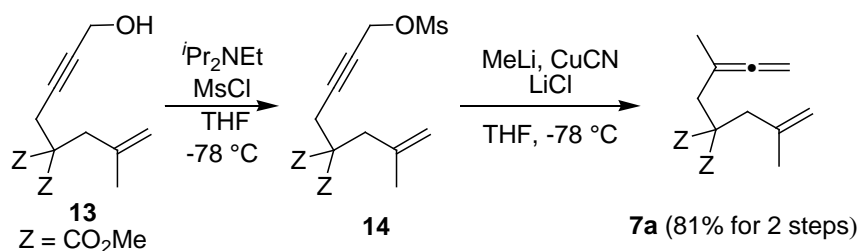

### 5,5-Bis(methoxycarbonyl)-3,7-dimethylocta-1,2,7-triene (**7a**).

To a solution of **13** [**1**] (727 mg, 2.86 mmol) in THF (29 mL) were added  $i\text{Pr}_2\text{NEt}$  (2.0 mL, 11 mmol) and  $\text{MsCl}$  (0.65 mL, 8.4 mmol) at  $-78\text{ }^\circ\text{C}$ . After stirring for 1.5 h at the same temperature, the reaction mixture was quenched by the addition of saturated aqueous  $\text{NaHCO}_3$ , and the mixture extracted with  $\text{AcOEt}$ . The extract was washed successively with water and brine, dried and concentrated to dryness. The residue was passed through a short pad of silica gel with hexane- $\text{AcOEt}$  (4:1) to afford crude **14**.  $\text{MeLi}$  (1.09 M in  $\text{Et}_2\text{O}$ , 9.9 mL, 11 mmol) was added gradually to a solution of  $\text{CuCN}$  (967 mg, 10.8 mmol) and  $\text{LiCl}$  (915 mg, 21.6 mmol) in THF (27 mL) at  $-78\text{ }^\circ\text{C}$ . The reaction mixture was then warmed to  $-20\text{ }^\circ\text{C}$  and at this temperature the solids dissolved. The reaction mixture was re-cooled to  $-78\text{ }^\circ\text{C}$  and the crude **14** added. After stirring for 1.5 h at the same temperature, the reaction mixture was quenched by the addition of saturated aqueous  $\text{NH}_4\text{Cl}$  and then extracted with  $\text{AcOEt}$ . The extract was washed successively with water and brine, dried, and concentrated to dryness. The residue was purified by chromatography with hexane- $\text{AcOEt}$  (15:1) as eluent to afford **7a** (577 mg, 81% for 2 steps) as a colorless oil: IR 1959, 1732  $\text{cm}^{-1}$ ;  $^1\text{H}$  NMR  $\delta$  4.86–4.85 (m, 1H), 4.72–4.71 (m, 1H), 4.59 (sex, 2H,  $J = 3.0\text{ Hz}$ ), 3.69 (s, 6H), 2.81 (s, 2H), 2.62 (t, 2H,  $J = 3.0\text{ Hz}$ ), 1.65–1.64 (m, 6H);  $^{13}\text{C}$  NMR  $\delta$  206.8, 171.5, 140.7, 115.5, 93.8, 75.2, 56.8, 52.3, 39.8, 35.1, 23.3, 20.3; MS  $m/z$  252 ( $\text{M}^+$ , 31.2); HRMS calcd for  $\text{C}_{14}\text{H}_{20}\text{O}_4$  252.1362, found 252.1363.

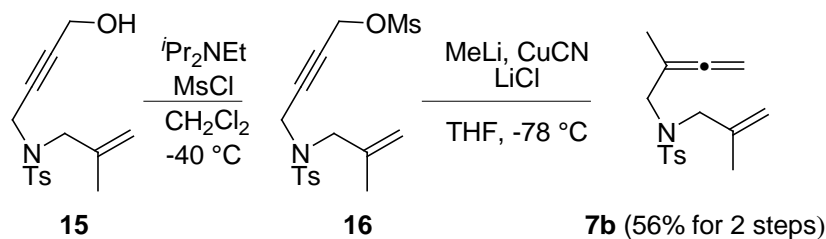

**3,7-Dimethyl-N-(4-methylbenzenesulfonyl)-5-azahepta-1,2,7-triene (7b).**

To a solution of **15** [2] (100 mg, 0.340 mmol) in CH<sub>2</sub>Cl<sub>2</sub> (3.4 mL) were added *i*Pr<sub>2</sub>NEt (0.24 mL, 1.4 mmol) and MsCl (0.080 mL, 1.0 mmol) at -40 °C. After stirring for 1 h at the same temperature, the reaction mixture was quenched by the addition of saturated aqueous NaHCO<sub>3</sub> and the mixture extracted with CH<sub>2</sub>Cl<sub>2</sub>. The extract was washed successively with water and brine, dried and concentrated to dryness. The residue was passed through a short pad of silica gel with hexane-AcOEt (2:1) as eluent to afford crude **16**. MeLi (1.09 M in Et<sub>2</sub>O, 1.20 mL, 1.36 mmol) was added gradually to a solution of CuCN (121 mg, 1.36 mmol) and LiCl (115 mg, 2.72 mmol) in THF (3.4 mL) at -78 °C. The reaction mixture was then warmed to -20 °C and at this temperature the solids dissolved. The reaction mixture was re-cooled to -78 °C and the crude **16** added. After stirring for 1.5 h at the same temperature, the reaction mixture was quenched by the addition of saturated aqueous NH<sub>4</sub>Cl and extracted with AcOEt. The extract was washed successively with water and brine, dried and concentrated to dryness. The residue was purified by chromatography with hexane-AcOEt (15:1) as eluent to afford **7b** (56.0 mg, 56% for 2 steps) as a yellow oil: IR 1961, 1338, 1157 cm<sup>-1</sup>; <sup>1</sup>H NMR δ 7.69 (d, 2H, *J* = 8.2 Hz), 7.28 (d, 2H, *J* = 8.2 Hz), 4.87 (s, 1H), 4.81 (s, 1H), 4.48 (sex, 2H, *J* = 3.0 Hz), 3.739 (t, 2H, *J* = 3.0 Hz), 3.731 (s, 2H), 2.41 (s, 3H), 1.63 (s, 3H), 1.57 (t, 3H, *J* = 3.0 Hz); <sup>13</sup>C NMR δ 207.3, 142.9, 140.0, 137.5, 129.4, 127.1, 114.2, 94.2, 74.9, 53.2, 50.3, 21.4, 19.9, 16.1; MS *m/z* 291 (M<sup>+</sup>, 20.4); HRMS calcd for C<sub>16</sub>H<sub>21</sub>NO<sub>2</sub>S 291.1293, found 291.1292.

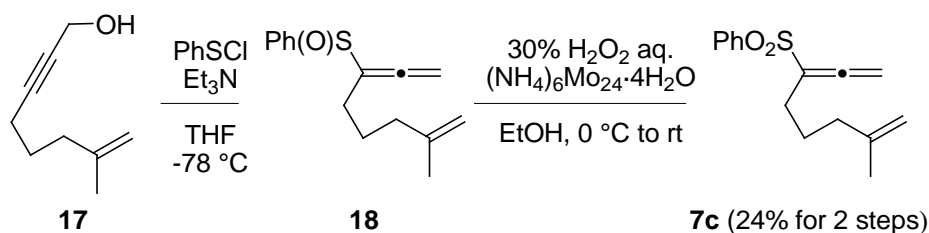

### 7-Methyl-3-phenylsulfonylocta-1,2,7-triene (**7c**).

PhSCl (310 mg, 2.2 mmol) in THF (2.2 mL) was added gradually to a solution of **17** [2] (100 mg, 0.724 mmol) and Et<sub>3</sub>N (0.90 mL, 6.5 mmol) in THF (4.8 mL) at -78 °C. After stirring for 2.5 h at the same temperature, the reaction was quenched by the addition of saturated aqueous NaHCO<sub>3</sub> and the mixture extracted with AcOEt. The extract was washed successively with water and brine, dried and concentrated to dryness. The residue was passed through a short pad of silica gel with hexane-AcOEt (9:1) as eluent to afford crude **18**. To a solution of (NH<sub>4</sub>)<sub>6</sub>Mo<sub>7</sub>O<sub>24</sub>·4H<sub>2</sub>O (520 mg, 0.421 mmol) in EtOH (4.0 mL) was added 30% H<sub>2</sub>O<sub>2</sub> (2.0 mL) at 0 °C. After stirring for 30 min at the same temperature, the crude **18** in EtOH (8.0 mL) was added dropwise to the reaction mixture at the same temperature. After the complete addition of the crude **18**, the reaction mixture was warmed to room temperature and stirred overnight. The reaction was quenched by the addition of saturated aqueous NaHCO<sub>3</sub> and then extracted with AcOEt. The extract was washed successively with water and brine, dried and concentrated to dryness. The residue was purified by chromatography with hexane-AcOEt (15:1) as eluent to afford **7c** (44.8 mg, 24% for 2 steps) as a pale yellow oil: IR 1969, 1940, 1649, 1317, 1307, 1149 cm<sup>-1</sup>; <sup>1</sup>H NMR δ 7.89 (d, 2H, *J* = 7.8 Hz), 7.62 (t, 1H, *J* = 7.8 Hz), 7.53 (t, 2H, *J* = 7.8 Hz), 5.36 (t, 2H, *J* = 3.4 Hz), 4.66 (s, 1H), 4.57 (s, 1H), 2.22 (tt, 2H, *J* = 7.5, 3.4 Hz), 1.96 (t, 2H, *J* = 7.5 Hz), 1.63 (s, 3H), 1.56 (quin, 2H, *J* = 7.5 Hz); <sup>13</sup>C NMR δ 207.7, 144.6, 140.1, 133.4, 129.0, 128.0, 113.1, 110.5, 84.3, 36.7, 26.1, 25.3, 22.1; MS *m/z* 262 (M<sup>+</sup>, 7.0); HRMS calcd for C<sub>15</sub>H<sub>18</sub>O<sub>2</sub>S 262.1028, found 262.1023.



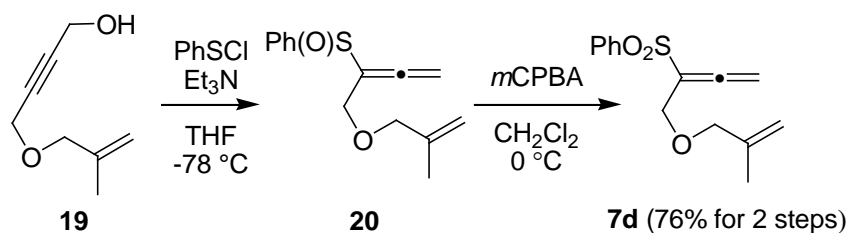

**7-Methyl-3-phenylsulfonyl-5-oxaocta-1,2,7-triene (7d).**

PhSCl (430 mg, 3.0 mmol) in THF (3.0 mL) was added gradually to a solution of **19** [3] (140 mg, 1.00 mmol) and Et<sub>3</sub>N (0.42 mL, 3.0 mmol) in THF (10 mL) at -78 °C. After stirring for 2.5 h at the same temperature, the reaction was quenched by the addition of saturated aqueous NaHCO<sub>3</sub> and the mixture extracted with AcOEt. The extract was washed successively with water and brine, dried, and concentrated to dryness. The residue was passed through a short pad of silica gel with hexane-AcOEt (4:1) as eluent to afford the crude sulfoxide. To a solution of the crude sulfoxide in CH<sub>2</sub>Cl<sub>2</sub> (10 mL) was added *m*CPBA (313 mg, 1.20 mmol) at the 0 °C. After stirring for 1 h, the reaction mixture was quenched by the addition of saturated aqueous Na<sub>2</sub>S<sub>2</sub>O<sub>3</sub> and NaHCO<sub>3</sub> and then extracted with CH<sub>2</sub>Cl<sub>2</sub>. The extract was washed successively with water and brine, dried and concentrated to dryness. The residue was purified by chromatography with hexane-AcOEt (10:1) as eluent to afford **7d** (200 mg, 76% for 2 steps) as a colorless oil: IR 1967, 1929, 1321, 1153 cm<sup>-1</sup>; <sup>1</sup>H NMR δ 7.94–7.91 (m, 2H), 7.63–7.58 (m, 1H), 7.54–7.50 (m, 2H), 5.47 (d, 1H, *J* = 2.0 Hz), 5.46 (d, 1H, *J* = 2.0 Hz), 4.81 (s, 1H), 4.78 (s, 1H), 4.28 (d, 1H, *J* = 2.1 Hz), 4.27 (d, 1H, *J* = 2.1 Hz), 3.69 (s, 2H), 1.60 (s, 3H); <sup>13</sup>C NMR δ 209.4, 140.9, 140.8, 133.3, 128.8, 127.8, 112.7, 110.1, 83.6, 73.6, 65.4, 19.1; MS *m/z* 264 (M<sup>+</sup>, 1.6); HRMS calcd for C<sub>14</sub>H<sub>16</sub>O<sub>3</sub>S 264.0820, found 264.0817.

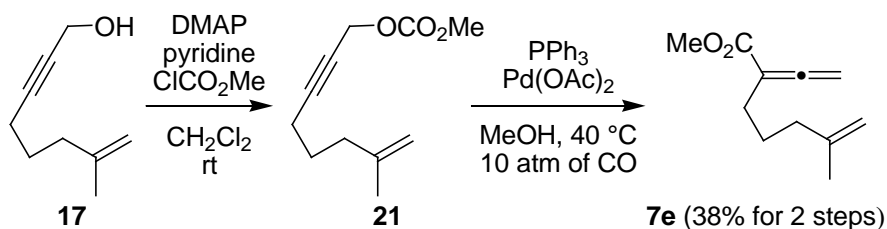

### 3-Methoxycarbonyl-7-methylocta-1,2,7-triene (**7e**).

To a solution of **17** [2] (100 mg, 0.724 mmol) in  $\text{CH}_2\text{Cl}_2$  (3.4 mL) were added DMAP (18 mg, 0.15 mmol), pyridine (0.63 mL, 7.8 mmol) and  $\text{ClCO}_2\text{Me}$  (0.20 mL, 2.6 mmol) at room temperature. After stirring for 5 h at the same temperature, the reaction mixture was quenched by the addition of saturated aqueous  $\text{NaHCO}_3$  and extracted with  $\text{CH}_2\text{Cl}_2$ . The extract was washed successively with water, 10% aqueous HCl and brine, dried, and concentrated to dryness. The residue was passed through a short pad of silica gel with hexane-AcOEt (10:1) as eluent to afford crude **21**. To a solution of the crude **21** in MeOH (1.0 mL) were added  $\text{Pd(OAc)}_2$  (5.8 mg,  $2.6 \times 10^{-2}$  mmol) and  $\text{PPh}_3$  (27.3 mg, 0.104 mmol) at room temperature. The reaction mixture was warmed to 40 °C under CO (10 atm) and stirred for 12 h. The MeOH was evaporated and the residue purified by chromatography with hexane-AcOEt (20:1) as eluent to afford **7e** (50.0 mg, 38% for 2 steps) as a colorless oil: IR 1967, 1936, 1712  $\text{cm}^{-1}$ ;  $^1\text{H}$  NMR  $\delta$  5.09 (t, 2H,  $J = 3.0$  Hz), 4.67–4.63 (m, 2H), 3.70 (s, 3H), 2.19 (tt, 2H,  $J = 7.7, 3.0$  Hz), 2.01 (t, 2H,  $J = 7.7$  Hz), 1.67 (s, 3H), 1.56 (quin, 2H,  $J = 7.7$  Hz);  $^{13}\text{C}$  NMR  $\delta$  213.8, 167.6, 145.3, 110.1, 99.9, 78.9, 52.1, 37.0, 27.5, 25.8, 22.2; MS  $m/z$  180 ( $\text{M}^+$ , 8.2); HRMS calcd for  $\text{C}_{11}\text{H}_{16}\text{O}_2$  180.1150, found 180.1146.

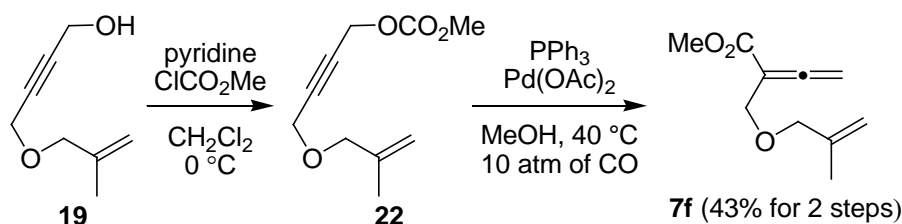

### 3-Methoxycarbonyl-7-methyl-5-oxaocta-1,2,7-triene (**7f**).

To a solution of **19** [3] (142 mg, 1.00 mmol) in  $\text{CH}_2\text{Cl}_2$  (5.0 mL) were added pyridine (0.24 mL, 3.0 mmol) and  $\text{ClCO}_2\text{Me}$  (0.15 mL, 2.0 mmol) at  $0^\circ\text{C}$ . After stirring for 30 min at the same temperature, the reaction mixture was quenched by the addition of water and extracted with  $\text{CH}_2\text{Cl}_2$ . The extract was washed successively with water, 5% aqueous HCl and brine, dried, and concentrated to dryness. The residue was passed through a short pad of silica gel with hexane-AcOEt (5:1) as eluent to afford crude **22** (194 mg). To a solution of the crude **22** (105 mg) in MeOH (1.0 mL) were added  $\text{Pd(OAc)}_2$  (5.7 mg,  $2.5 \times 10^{-2}$  mmol) and  $\text{PPh}_3$  (26.2 mg, 0.100 mmol) at room temperature. The reaction mixture was warmed to  $40^\circ\text{C}$  under CO (10 atm) and stirred for 11 h. The MeOH was evaporated and the residue purified by chromatography with hexane-AcOEt (50:1) as eluent to afford **7f** (42.0 mg, 43% for 2 steps) as a colorless oil: IR 1967, 1930, 1751, 1713  $\text{cm}^{-1}$ ;  $^1\text{H}$  NMR  $\delta$  5.22 (d, 1H,  $J = 2.1$  Hz), 5.21 (d, 1H,  $J = 2.1$  Hz), 4.97–4.91 (m, 1H), 4.89–4.84 (m, 1H), 4.15 (d, 1H,  $J = 2.1$  Hz), 4.14 (d, 1H,  $J = 2.1$  Hz), 3.90 (s, 2H), 3.73 (s, 3H), 1.70 (s, 3H);  $^{13}\text{C}$  NMR  $\delta$  214.6, 166.3, 141.8, 112.7, 97.9, 79.6, 74.3, 66.4, 52.3, 19.4; FABMS  $m/z$  183 ( $\text{M}^+ + 1$ , 10.9); FABHRMS calcd for  $\text{C}_{10}\text{H}_{15}\text{O}_3$  183.1021, found 183.1016.

Alcohols **13**, **15**, **17**, **19** were known compounds, see: [1] Kitamura, T.; Sato, Y.; Mori, M. *Adv. Synth. Catal.* **2002**, *344*, 678–693; [2] Shen, K.-H.; Lush, S.-F.; Chen, T.-L.; Liu, R.-S. *J. Org. Chem.* **2001**, *66*, 8106–8111; [3] Padwa, A.; Lipka, H.; Watterson, S. H.; Murphree, S. S. *J. Org. Chem.* **2003**, *68*, 6238–6250.

Allenenes **1a**, **1b**, **7g** were known compounds, see: [4] Inagaki, F.; Mukai, C. *Org. Lett.* **2006**, *8*, 1217–1220; [5] Tarselli, M. A.; Chianese, A. R.; Lee, S. J.; Gagné, M. R. *Angew. Chem., Int. Ed.* **2007**, *46*, 6670–6673.

**General Procedure for Pauson–Khand-type [2 + 2 + 1] cycloaddition under the atmosphere consisting of 0.05 atm of CO and 0.95 atm of Ar.**

To a solution of allenene (0.100 mmol) in toluene (1.0 mL) were added 5 mol % [RhCl(CO)dppp]<sub>2</sub> and 12 mol % AgBF<sub>4</sub> in toluene (0.2 mL) and then stirred for 15 min at room temperature under an argon atmosphere. The argon atmosphere was replaced with the atmosphere consisting of CO and argon (1:19) and the reaction mixture was heated under reflux until complete disappearance of the starting material (monitored by TLC). The toluene was evaporated and the residual oil purified by chromatography with hexane-AcOEt as eluent to afford the cyclized product. Chemical yields are summarized in Table 1 and 2.

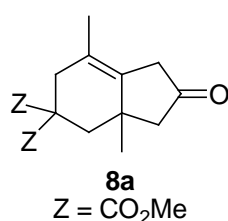

**4,4-Bis(methoxycarbonyl)-2,6-dimethylbicyclo[4.3.0]non-1-en-8-one (8a).**

Compound **8a**, colorless oil; IR 1747, 1732 cm<sup>-1</sup>; <sup>1</sup>H NMR δ 3.71 (s, 3H), 3.70 (s, 3H), 2.96–2.83 (m, 3H), 2.41 (d, 1H, *J* = 14.0 Hz), 2.31–2.20 (m, 4H), 1.66 (s, 3H), 0.97 (s, 3H); <sup>13</sup>C NMR δ 215.5, 172.2, 172.1, 132.4, 124.2, 56.6, 53.0, 52.7, 52.5, 39.8, 39.6, 39.2, 35.2, 26.1, 19.6; MS *m/z* 280 (M<sup>+</sup>, 51.8); HRMS calcd for C<sub>15</sub>H<sub>20</sub>O<sub>5</sub> 280.1310, found 280.1307.

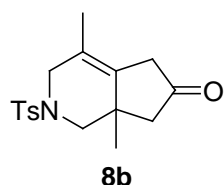

**2,6-Dimethyl-N-(4-methylphenylsulfonyl)-4-azabicyclo[4.3.0]non-1-en-8-one (8b).**

Compound **8b**, yellow oil; IR 1747, 1338, 1166 cm<sup>-1</sup>; <sup>1</sup>H NMR δ 7.68 (d, 2H, *J* = 8.5 Hz), 7.33 (d, 2H, *J* = 8.5 Hz), 3.96 (d, 1H, *J* = 16.4 Hz), 3.85 (d, 1H, *J* = 10.3 Hz), 3.04 (d, 1H, *J* = 16.4 Hz), 2.89 (s, 2H), 2.43 (s, 3H), 2.31 (d, 1H, *J* = 10.3 Hz), 2.25 (d, 1H, *J* = 16.4 Hz), 2.05 (d, 1H, *J* = 16.4 Hz), 1.57 (s, 3H), 1.27 (s, 3H); <sup>13</sup>C NMR δ 213.9, 143.6, 133.5, 132.6, 129.7, 127.5, 122.3, 53.8, 51.6, 48.4, 40.7, 39.1, 24.3, 21.4, 16.6; MS *m/z* 319 (M<sup>+</sup>, 53.4); HRMS calcd for C<sub>17</sub>H<sub>21</sub>NO<sub>3</sub>S 319.1242, found 319.1238.

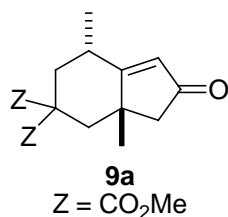

**(2*R*<sup>\*</sup>,6*R*<sup>\*</sup>)-4,4-Bis(methoxycarbonyl)-2,6-dimethylbicyclo[4.3.0]non-1(9)-en-8-one (*trans*-9a).**

Compound **9a**, colorless oil; IR 1730, 1685, 1616 cm<sup>-1</sup>; <sup>1</sup>H NMR δ 5.81 (d, 1H, *J* = 1.7 Hz), 3.78 (s, 3H), 3.70 (s, 3H), 2.98 (dq, 1H, *J* = 12.6, 6.3 Hz), 2.70–2.66 (m, 2H), 2.30 (s, 2H), 2.05 (d, 1H, *J* = 14.4 Hz), 1.33–1.28 (m, 1H), 1.21 (d, 3H, *J* = 6.3 Hz), 1.11 (s, 3H); <sup>13</sup>C NMR δ 206.6, 189.7, 171.9, 171.4, 124.9,

53.6, 53.2, 53.0, 52.6, 43.5, 42.8, 40.4, 28.9, 25.4, 17.8; MS  $m/z$  280 ( $M^+$ , 51.8); HRMS calcd for  $C_{15}H_{20}O_5$  280.1310, found 280.1307.

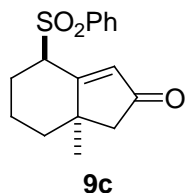

**(2*R*\*,6*R*\*)-6-Methyl-2-(phenylsulfonyl)bicyclo[4.3.0]non-1(9)-en-8-one (*trans*-9c).**

Compound **9c**, colorless powder; mp 224–226 °C (hexane-AcOEt); IR 1704, 1616, 1309, 1145  $cm^{-1}$ ;  $^1H$  NMR  $\delta$  7.93 (d, 2H,  $J$  = 7.5 Hz), 7.69 (t, 1H,  $J$  = 7.5 Hz), 7.60 (t, 2H,  $J$  = 7.5 Hz), 6.50 (s, 1H), 4.03 (dd, 1H,  $J$  = 13.0, 4.0 Hz), 2.29 (d, 1H,  $J$  = 18.5 Hz), 2.23 (d, 1H,  $J$  = 18.5 Hz), 2.19–2.17 (m, 1H), 1.93 (d, 1H,  $J$  = 13.0 Hz), 1.83–1.79 (m, 1H), 1.75 (td, 1H,  $J$  = 13.0, 4.0 Hz), 1.70–1.64 (m, 1H), 1.44 (td, 1H,  $J$  = 13.0, 4.0 Hz), 1.21 (s, 3H);  $^{13}C$  NMR  $\delta$  206.3, 173.8, 137.6, 134.1, 129.4, 128.6, 128.5, 62.4, 50.8, 44.7, 39.8, 28.6, 23.7, 20.9; MS  $m/z$  290 ( $M^+$ , 0.7); HRMS calcd for  $C_{16}H_{18}O_3S$  290.0977, found 290.0976.

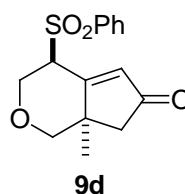

**(2*R*\*,6*S*\*)-6-Methyl-2-(phenylsulfonyl)-4-oxabicyclo[4.3.0]non-1(9)-en-8-one (*trans*-9d).**

Compound **9d**, colorless plates; mp 141–143 °C (hexane-AcOEt); IR 1717, 1618, 1327, 1151  $cm^{-1}$ ;  $^1H$  NMR  $\delta$  7.96–7.92 (m, 2H), 7.78–7.71 (m, 1H), 7.66–7.62 (m, 2H), 6.61 (d, 1H,  $J$  = 1.5 Hz), 4.32 (ddd, 1H,  $J$  = 10.7, 5.4, 1.5 Hz), 4.20 (dd, 1H,  $J$  = 10.7, 5.4 Hz), 3.89 (d, 1H,  $J$  = 11.0 Hz), 3.62 (t, 1H,  $J$  = 10.7 Hz), 3.26 (d, 1H,  $J$  = 11.0 Hz), 2.21 (d, 1H,  $J$  = 18.7 Hz), 2.13 (d, 1H,  $J$  = 18.7 Hz), 1.34 (s, 3H);  $^{13}C$  NMR  $\delta$  204.9, 170.3, 137.6, 134.7, 129.7, 128.7, 128.4, 78.0, 68.3, 61.2, 45.2, 45.1, 23.2; MS  $m/z$  292 ( $M^+$ , 5.6); HRMS calcd for  $C_{15}H_{16}O_4S$  292.0769, found 292.0767.

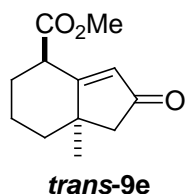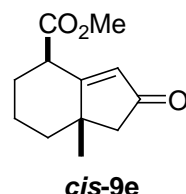

**(2*R*\*,6*R*\*)-and (2*R*\*,6*S*\*)-2-Methoxycarbonyl-6-methylbicyclo[4.3.0]non-1(9)-en-8-one (*trans*-9e and *cis*-9e).**

A mixture of *trans*-9e and *cis*-9e in the ratio of 87:13 was obtained as a colorless oil; IR 1737, 1701, 1616  $cm^{-1}$ ;  $^1H$  NMR  $\delta$  5.92 (s, 13/100 x 1H), 5.64 (d, 87/100 x 1H,  $J$  = 1.4 Hz), 3.88 (d, 13/100 x 1H,  $J$  = 5.1 Hz), 3.72 (s, 87/100 x 3H), 3.65 (s, 13/100 x 3H), 3.59 (ddd, 87/100 x 1H,  $J$  = 12.1, 5.1, 1.4 Hz), 2.45–2.36 (m, 13/100 x 1H), 2.19–2.11 (m, 87/100 x 2H, 13/100 x 2H), 2.03 (quin, 87/100 x 1H,  $J$  = 2.3 Hz), 1.98–1.70 (m, 87/100 x 3H, 13/100 x 1H), 1.69–1.58 (m, 87/100 x

1H, 13/100 x 1H), 1.55–1.52 (m, 13/100 x 2H), 1.50–1.40 (m, 87/100 x 1H, 13/100 x 1H), 1.29 (s, 87/100 x 3H), 1.12 (s, 13/100 x 3H);  $^{13}\text{C}$  NMR  $\delta$  207.3, 206.8, 182.4, 181.9, 172.3, 171.4, 130.4, 126.2, 52.6, 52.2, 52.0, 51.8, 44.1, 43.58, 43.53, 43.3, 40.4, 40.1, 30.5, 28.4, 24.3, 24.1, 20.8, 18.9; MS  $m/z$  208 ( $\text{M}^+$ , 38.5); HRMS calcd for  $\text{C}_{12}\text{H}_{16}\text{O}_3$  208.1099, found 208.1103.

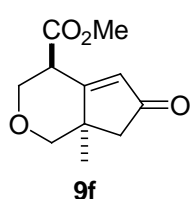

**(2*R*\*,6*S*\*)-2-Methoxycarbonyl-6-methyl-4-oxabicyclo[4.3.0]non-1(9)-en-8-one (*trans*-9f).**

Compound **9f**, colorless oil; IR 1738, 1713, 1620  $\text{cm}^{-1}$ ;  $^1\text{H}$  NMR  $\delta$  5.96 (d, 1H,  $J = 1.8$  Hz), 4.37 (dd, 1H,  $J = 11.0, 5.5$  Hz), 3.92 (d, 1H,  $J = 11.0$  Hz), 3.80 (ddd, 1H,  $J = 11.0, 5.5, 1.8$  Hz), 3.77 (s, 3H), 3.54 (t, 1H,  $J = 11.0$  Hz), 3.25 (d, 1H,  $J = 11.0$  Hz), 2.24 (d, 1H,  $J = 18.5$  Hz), 2.13 (d, 1H,  $J = 18.5$  Hz), 1.40 (s, 3H);  $^{13}\text{C}$  NMR  $\delta$  205.4, 178.2, 169.6, 126.7, 78.3, 69.9, 52.2, 46.1, 44.2, 44.0, 23.2; MS  $m/z$  210 ( $\text{M}^+$ , 100.0); HRMS calcd for  $\text{C}_{11}\text{H}_{14}\text{O}_4$  210.0892, found 210.0894.

### Synthesis of

**(2*R*\*,6*R*\*)-4,4-Bis(methoxycarbonyl)-6-methyl-2-phenylsulfonylbicyclo[4.3.0]non-1(9)-en-8-one (*trans*-2a).**

To a solution of **1a** (37.2 mg, 0.10 mmol) in toluene (1.0 mL) was added  $[\text{RhCl}(\text{CO})\text{dppp}]_2$  (6.0 mg,  $5.0 \times 10^{-3}$  mmol). The reaction mixture was heated under reflux for 1 h under CO (1 atm). The solvent was evaporated and the residue purified by chromatography with hexane-AcOEt (1:1) as eluent to afford **2a** (35.2 mg, 88%).

Bicyclic compounds **2a**, **2b** were known compounds, see reference [4]: Inagaki, F.; Mukai, C. *Org. Lett.* **2006**, 8, 1217–1220.

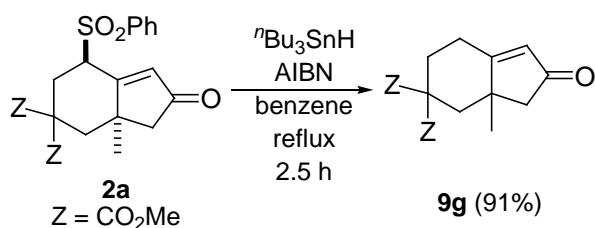

#### 4,4-Bismethoxycarbonyl-6-methyl-bicyclo[4.3.0]non-1(9)-en-8-one (**9g**).

To a solution of **2a** (40.6 mg, 0.100 mmol) in benzene (2.0 mL) were added  $n\text{Bu}_3\text{SnH}$  (0.05 mL, 0.2 mmol) and AIBN (1.6 mg,  $9.7 \times 10^{-3}$  mmol). After heating under reflux for 2.5 h, the solvent was evaporated and the residue purified by chromatography with hexane-AcOEt (10:1) as eluent to afford **9g** (24.3 mg, 91%) as colorless needles, mp 70–72 °C (hexane); IR 1730, 1683, 1625  $\text{cm}^{-1}$ ;  $^1\text{H}$  NMR  $\delta$  5.83 (d, 1H,  $J = 1.4$  Hz), 3.79 (s, 3H), 3.70 (s, 3H), 2.82 (tdd, 1H,  $J = 13.6, 5.0, 1.4$  Hz), 2.77–2.72 (m, 1H), 2.70–2.66 (m, 2H), 2.28 (d, 2H,  $J = 2.4$  Hz), 2.09 (d, 1H,  $J = 13.6$  Hz), 1.64–1.58 (m, 1H), 1.10 (s, 3H);  $^{13}\text{C}$  NMR  $\delta$  206.8, 185.0, 171.7, 171.5, 127.0, 53.0, 52.9, 52.8, 52.6, 43.4, 42.2, 32.2, 24.9, 24.5; MS  $m/z$  266 ( $\text{M}^+$ , 30.8); HRMS calcd for  $\text{C}_{14}\text{H}_{18}\text{O}_5$  266.1154, found 266.1154.

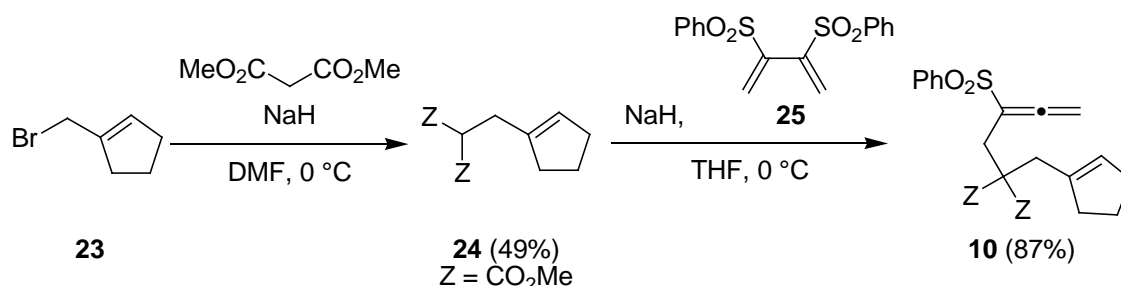

#### Dimethyl (cyclopent-1-en-1-ylmethyl)malonate (**24**).

To a solution of dimethyl malonate (32 mg, 0.24 mmol) in DMF (2.0 mL) was added NaH (9.6 mg, 0.24 mmol) at 0 °C. After stirring for 1 h, **23** [6] (13 mg, 0.080 mmol) in DMF (1.0 mL) was added to the reaction mixture at 0 °C. After stirring for 2 h at room temperature, the reaction mixture was quenched by addition of water and extracted with  $\text{Et}_2\text{O}$ . The extract was washed successively with water and brine, dried and concentrated to dryness. The residue was purified by chromatography with hexane-AcOEt (4:1) as eluent to afford **24** as a yellow oil (8.4 mg, 49%): IR 1751, 1732  $\text{cm}^{-1}$ ;  $^1\text{H}$  NMR  $\delta$  5.38 (t, 1H,  $J = 1.3$  Hz), 3.72 (s, 6H), 3.60 (t, 1H,  $J = 7.6$  Hz), 2.68 (dd, 2H,  $J = 7.6, 1.3$  Hz), 2.28–2.21 (m, 4H), 1.85 (m, 2H);  $^{13}\text{C}$  NMR  $\delta$  169.9, 140.3, 125.9, 52.5, 50.5, 34.9, 32.5, 30.4, 23.3; MS  $m/z$  212 ( $\text{M}^+$ , 8.4); HRMS calcd for  $\text{C}_{11}\text{H}_{16}\text{O}_4$  212.1049, found 212.1051.

**Dimethyl 2-(cyclopent-1-en-1-ylmethyl)-2-[2-(phenylsulfonyl)buta-2,3-dienyl]malonate (10).**

To a solution of **24** (212 mg, 1.00 mmol) in THF (10 mL) was added NaH (40 mg, 1.0 mmol) at 0 °C. After stirring for 1.5 h, a solution of **25** [7] (334 mg, 1.00 mmol) in THF (10 mL) was added to the reaction mixture at 0 °C. After stirring for 10 min at the same temperature, the reaction mixture was quenched by addition of water and extracted with AcOEt. The extract was washed successively with water and brine, dried and concentrated to dryness. The residue was purified by chromatography with hexane-AcOEt (3:1 to 1:1) as eluent to afford **10** (353 mg, 87%) as colorless needles: mp 113 °C (hexane-AcOEt); IR 1971, 1938, 1736, 1225, 1153  $\text{cm}^{-1}$ ;  $^1\text{H}$  NMR  $\delta$  7.88 (d, 2H,  $J = 7.5$  Hz), 7.63 (t, 1H,  $J = 7.5$  Hz), 7.55 (t, 2H,  $J = 7.5$  Hz), 5.41 (t, 2H,  $J = 3.8$  Hz), 5.23 (s, 1H), 3.64 (s, 6H), 2.90 (t, 2H,  $J = 3.8$  Hz), 2.81 (s, 2H), 2.16–2.14 (m, 2H), 2.02–2.00 (m, 2H), 1.75–1.70 (m, 2H);  $^{13}\text{C}$  NMR  $\delta$  207.9, 170.3, 139.9, 137.9, 133.5, 129.8, 129.1, 128.2, 109.4, 85.8, 56.1, 52.6, 35.4, 33.5, 32.3, 28.4, 23.6; MS  $m/z$  404 ( $\text{M}^+$ , 4.2); Anal. Calcd for  $\text{C}_{21}\text{H}_{24}\text{O}_6\text{S}$ : C, 62.36; H, 5.98. Found: C, 62.30; H 6.01.



Compounds **23** and **25** were known compounds, see: [6] Kim, D. D.; Lee, S. J.; Beak, P. J. *Org. Chem.* **2005**, *70*, 5376–5386. [7] Jaganathan, S.; Okamura, W. H. *Tetrahedron Lett.* **1982**, *23*, 4763–4764.

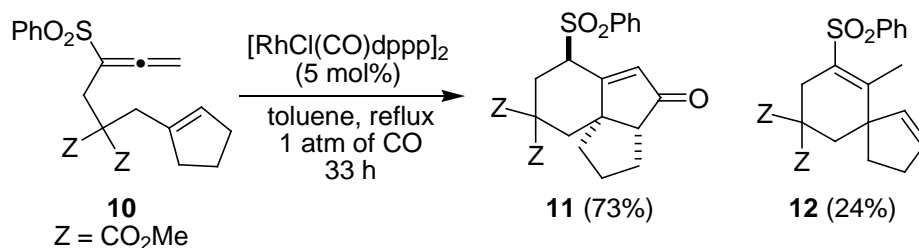

**11-Bis(methoxycarbonyl)-9-phenylsulfonyltricyclo[6.4.0.0<sup>1,5</sup>]dodec-7-ene-6-one (11) and 9-Bismethoxycarbonyl-7-phenylsulfonylspiro[4.5]deca-1,6-diene (12).**

According to the same procedure described for preparation of **2a**, **11** (31 mg, 73%) and **12** (9.9 mg, 24%) were obtained from **10** (40 mg, 0.10 mmol).

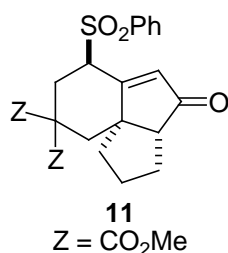

Compound **11**, colorless needles; mp 196–197 °C (hexane-AcOEt); IR 1732, 1707, 1618  $\text{cm}^{-1}$ ;  $^1\text{H}$  NMR  $\delta$  7.98 (d, 2H,  $J = 7.3$  Hz), 7.72 (t, 1H,  $J = 7.3$  Hz), 7.63 (t, 2H,  $J = 7.3$  Hz), 6.67 (s, 1H), 4.63–4.60 (m, 1H), 3.72 (s, 3H), 3.70 (s, 3H), 2.67–2.64 (m, 2H), 2.38 (d, 1H,  $J = 9.2$  Hz), 2.30 (d, 1H,  $J = 14.0$  Hz), 2.00–1.90 (m, 2H), 1.74–1.59 (m, 3H), 1.33–1.18 (m, 2H);  $^{13}\text{C}$  NMR  $\delta$  209.1, 171.1, 170.0, 169.4, 137.6, 134.4, 130.9, 129.5, 128.5, 59.5, 58.5, 55.5, 53.4, 53.3, 52.9, 43.0, 34.3, 33.0, 28.6, 25.2; MS  $m/z$  432 ( $\text{M}^+$ , 11); Anal. Calcd for  $\text{C}_{22}\text{H}_{24}\text{O}_7\text{S}$ : C, 61.10; H, 5.59. Found: C, 61.02; H, 5.63.

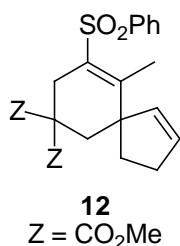

Compound **12**, yellow oil; IR 1734, 1628, 1225, 1157  $\text{cm}^{-1}$ ;  $^1\text{H}$  NMR  $\delta$  8.02–8.00 (m, 2H), 7.62–7.59 (m, 1H), 7.56–7.54 (m, 2H), 5.86 (dt, 1H,  $J = 5.5, 2.1$  Hz), 5.22 (dt, 1H,  $J = 5.5, 2.1$  Hz), 3.68 (s, 3H), 3.64 (s, 3H), 3.17 (dt, 1H,  $J = 17.8, 1.4$  Hz), 2.83 (dd, 1H,  $J = 17.8, 2.1$  Hz), 2.50–2.42 (m, 1H), 2.38–2.31 (m, 1H), 2.22 (d, 2H,  $J = 5.5$  Hz), 1.88 (t, 3H,  $J = 1.4$  Hz), 1.82–1.76 (m, 1H), 1.64–1.58 (m, 1H);  $^{13}\text{C}$  NMR  $\delta$  171.2, 170.9, 151.4, 141.8, 136.0, 133.1, 132.9, 131.6, 128.9, 127.1, 55.4, 52.7, 52.5, 51.7, 39.7, 34.9, 32.7, 32.1, 15.8; MS  $m/z$  404 ( $\text{M}^+$ , 10.4); HRMS calcd for  $\text{C}_{21}\text{H}_{24}\text{O}_6\text{S}$  404.1294, found 404.1298.

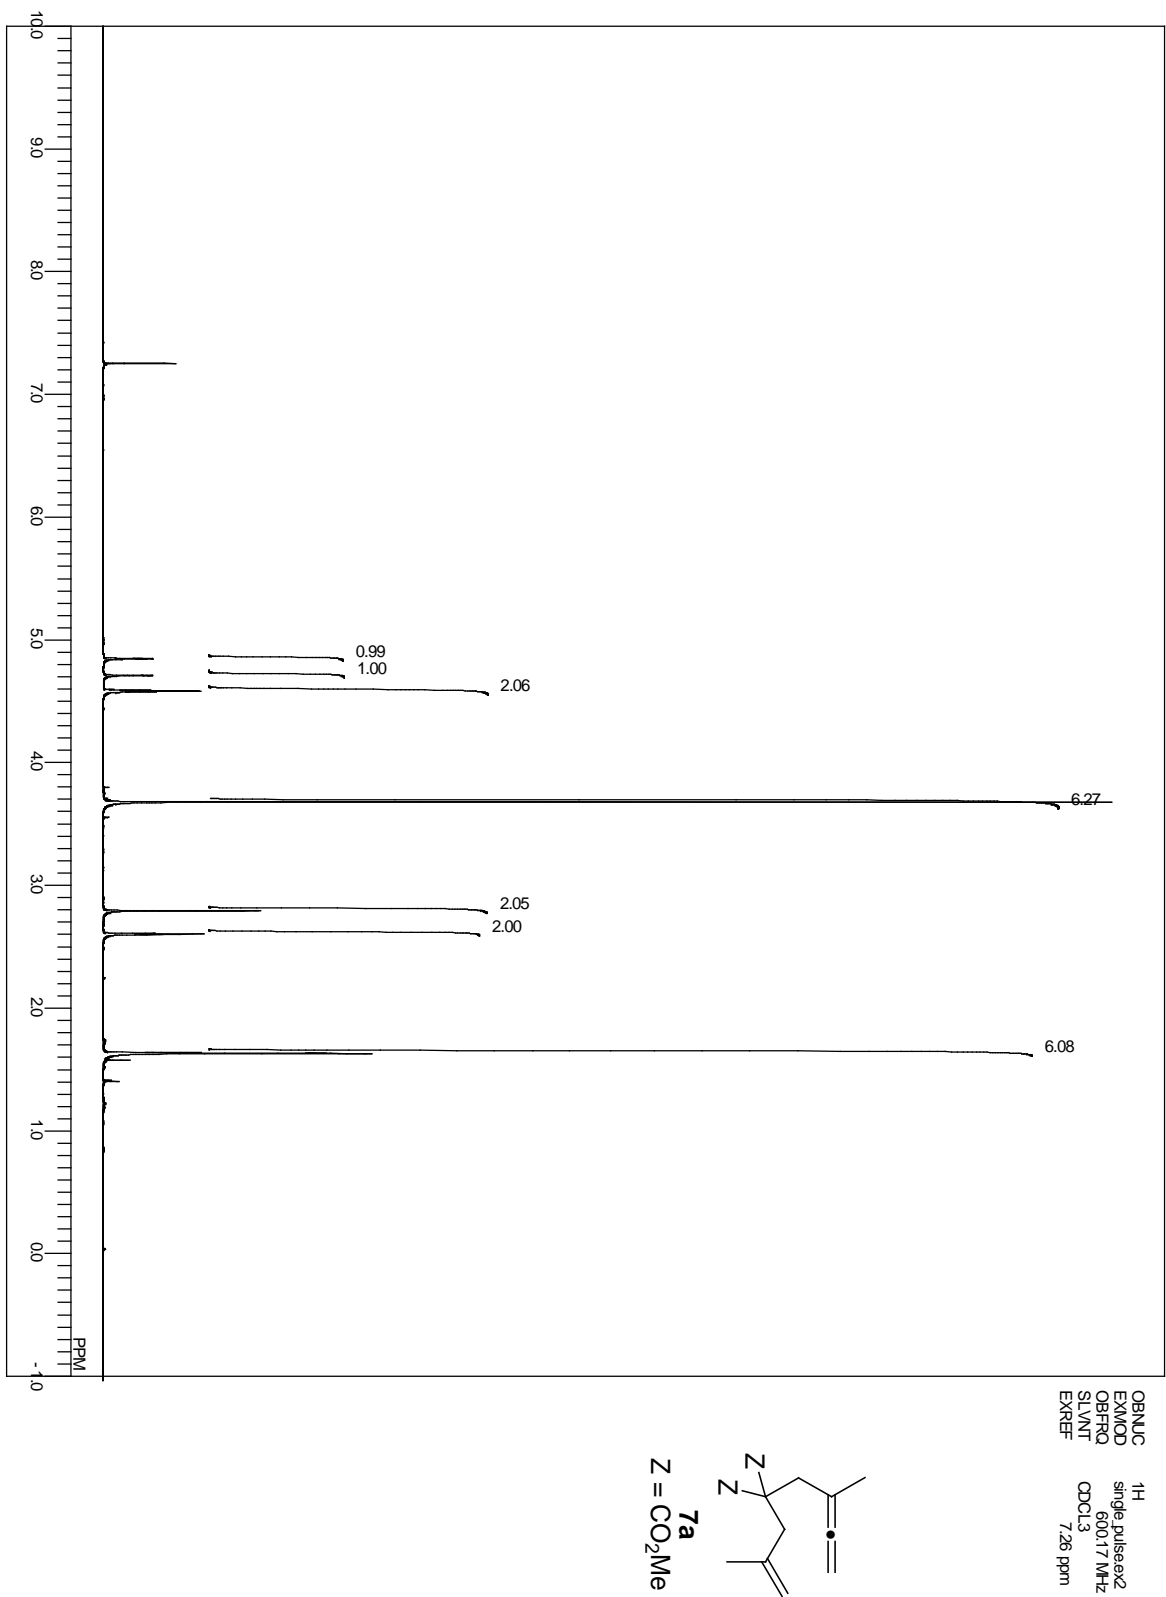

OBNUC <sup>13</sup>C  
EXMCD single pulse dec  
GBFREQ 150.92 MHz  
SLVNT CDCl<sub>3</sub>  
EXREF 77.00 ppm

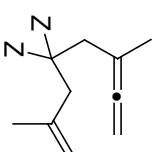

**7a**  
 $\text{Z} = \text{CO}_2\text{Me}$

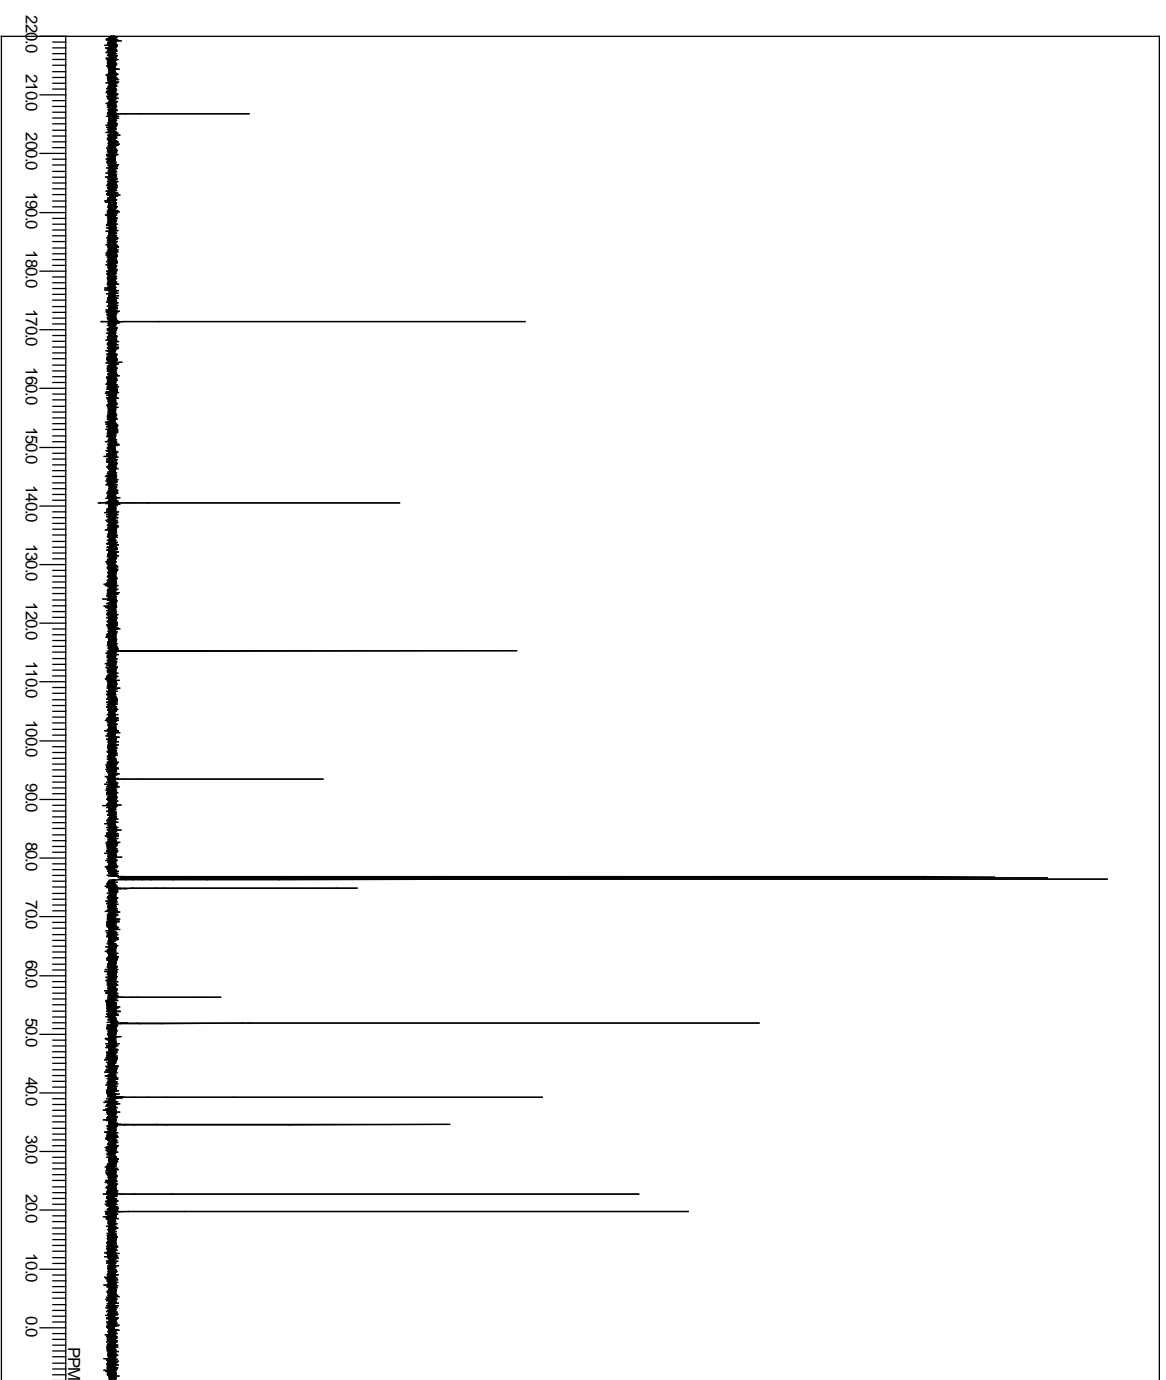

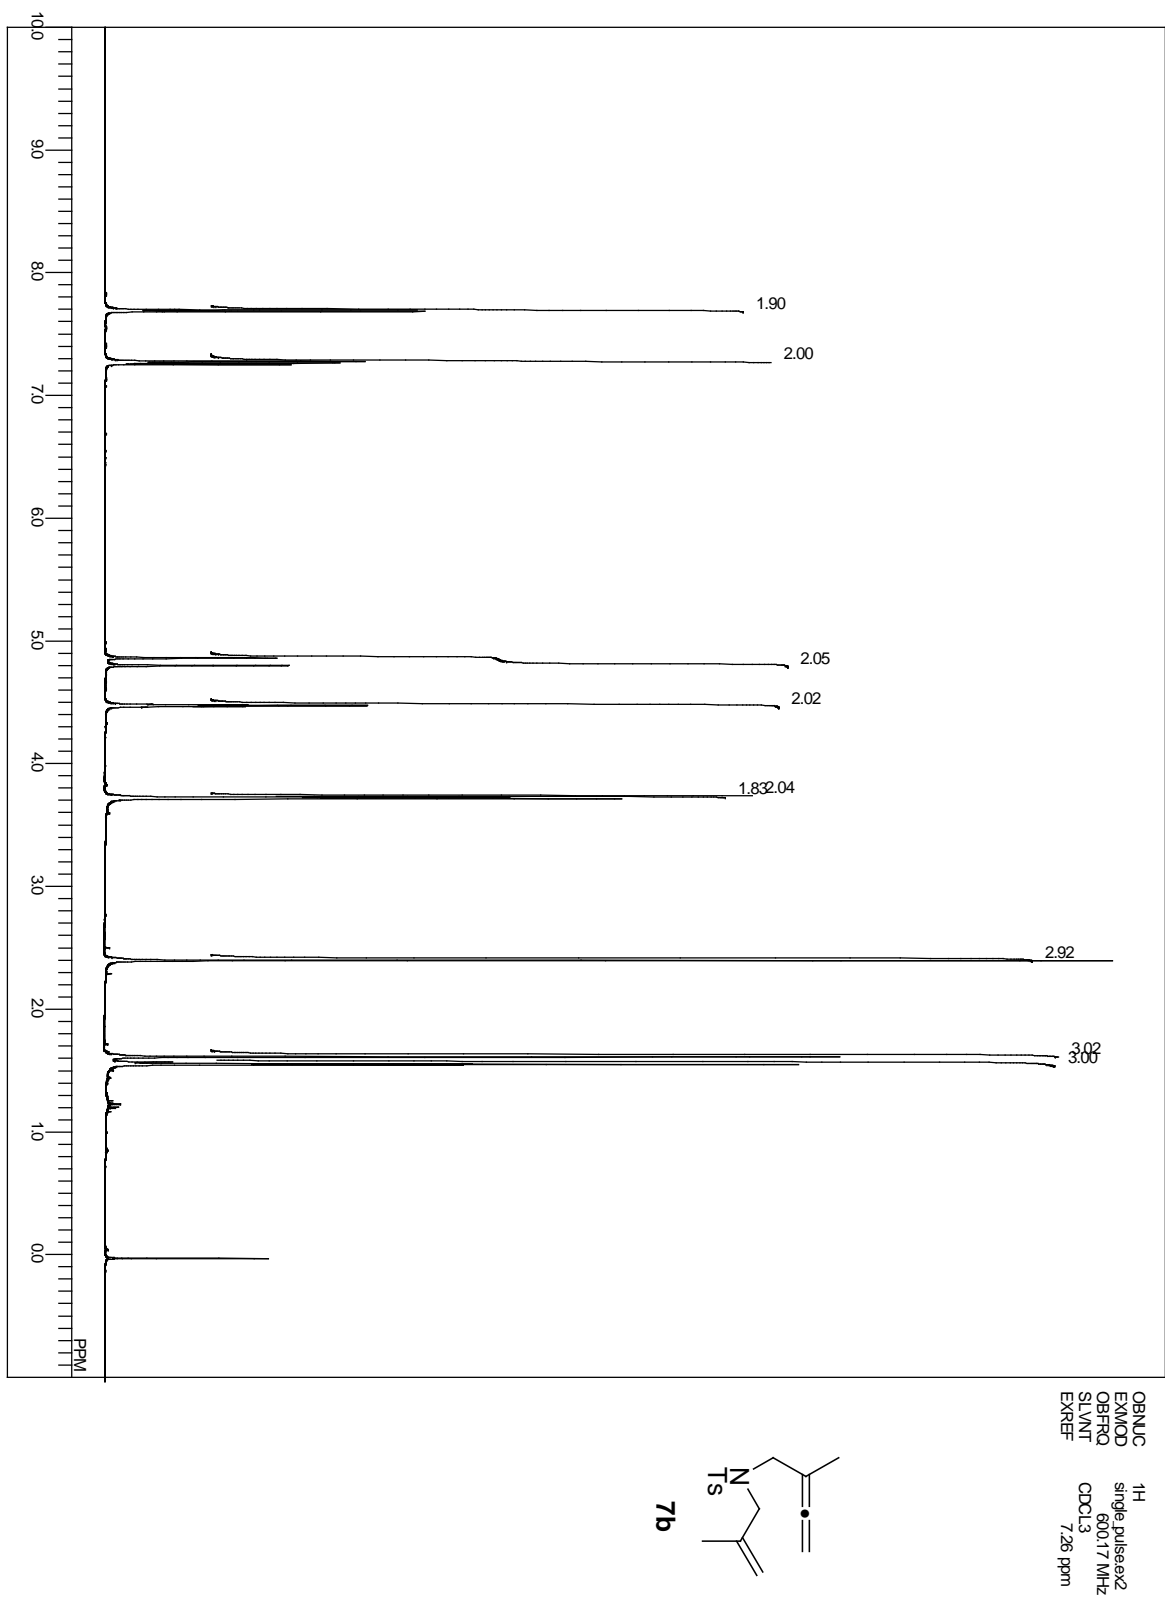

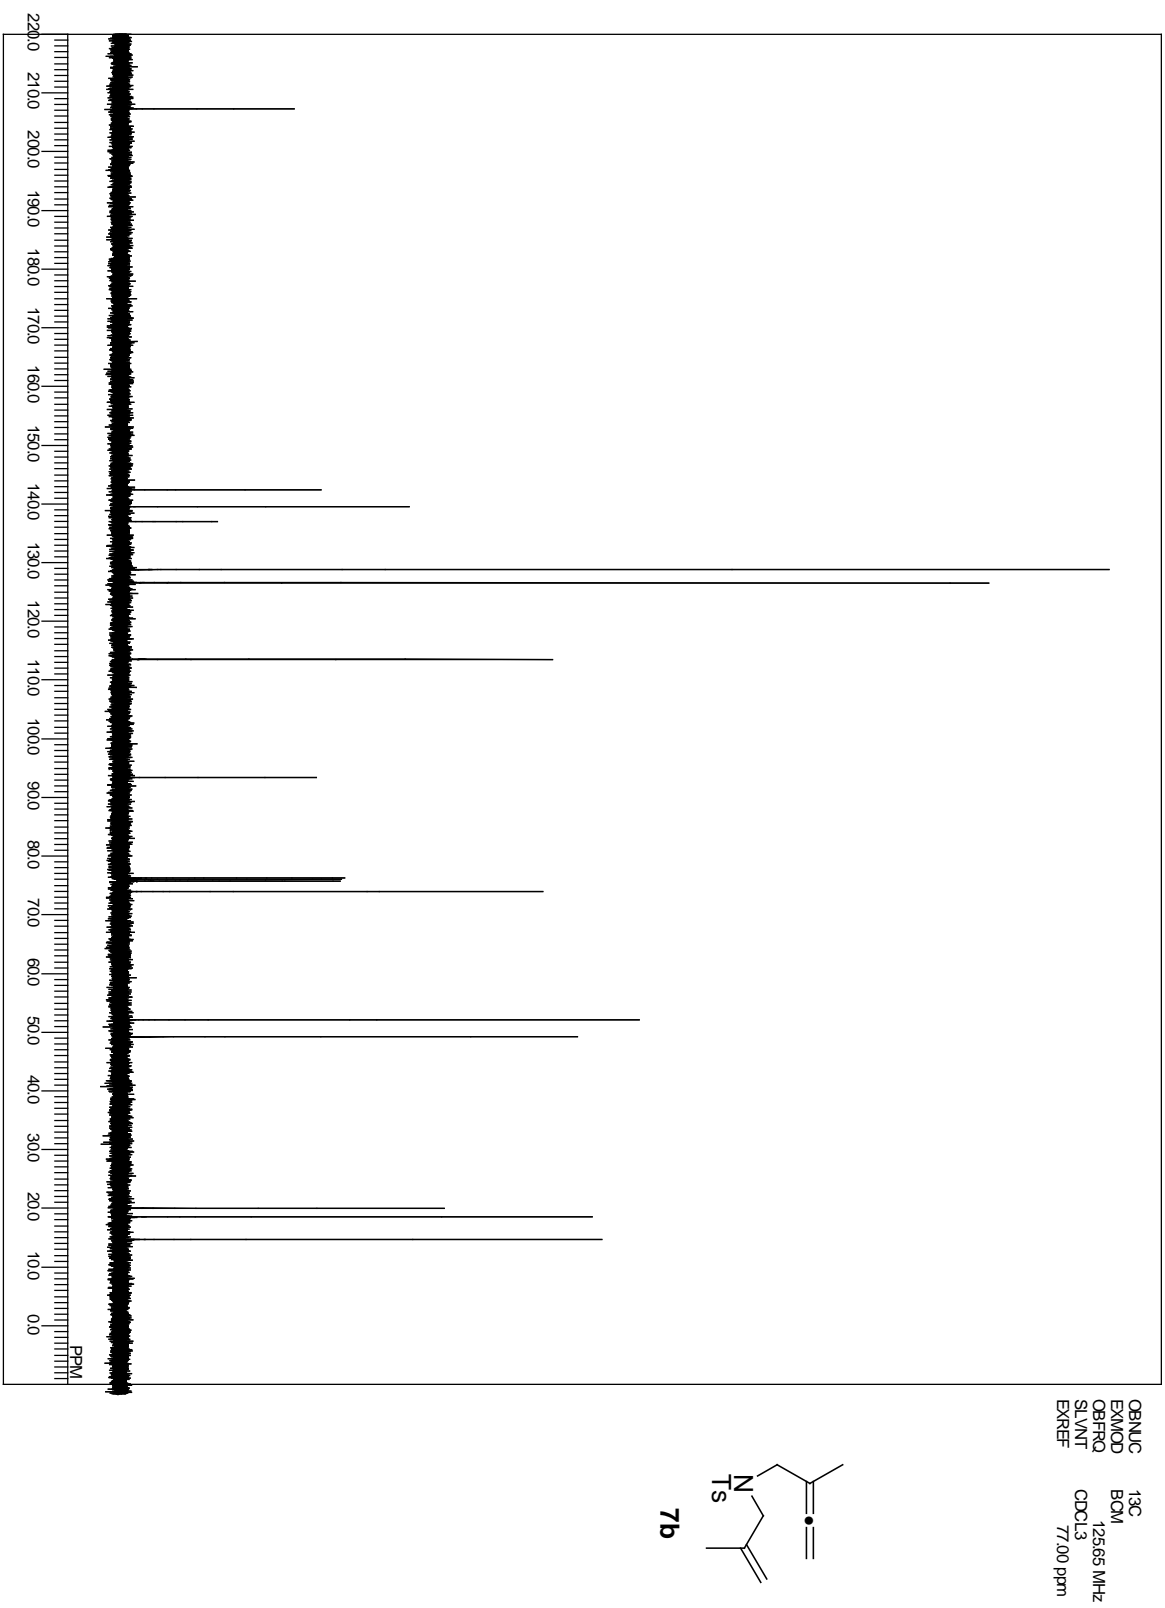

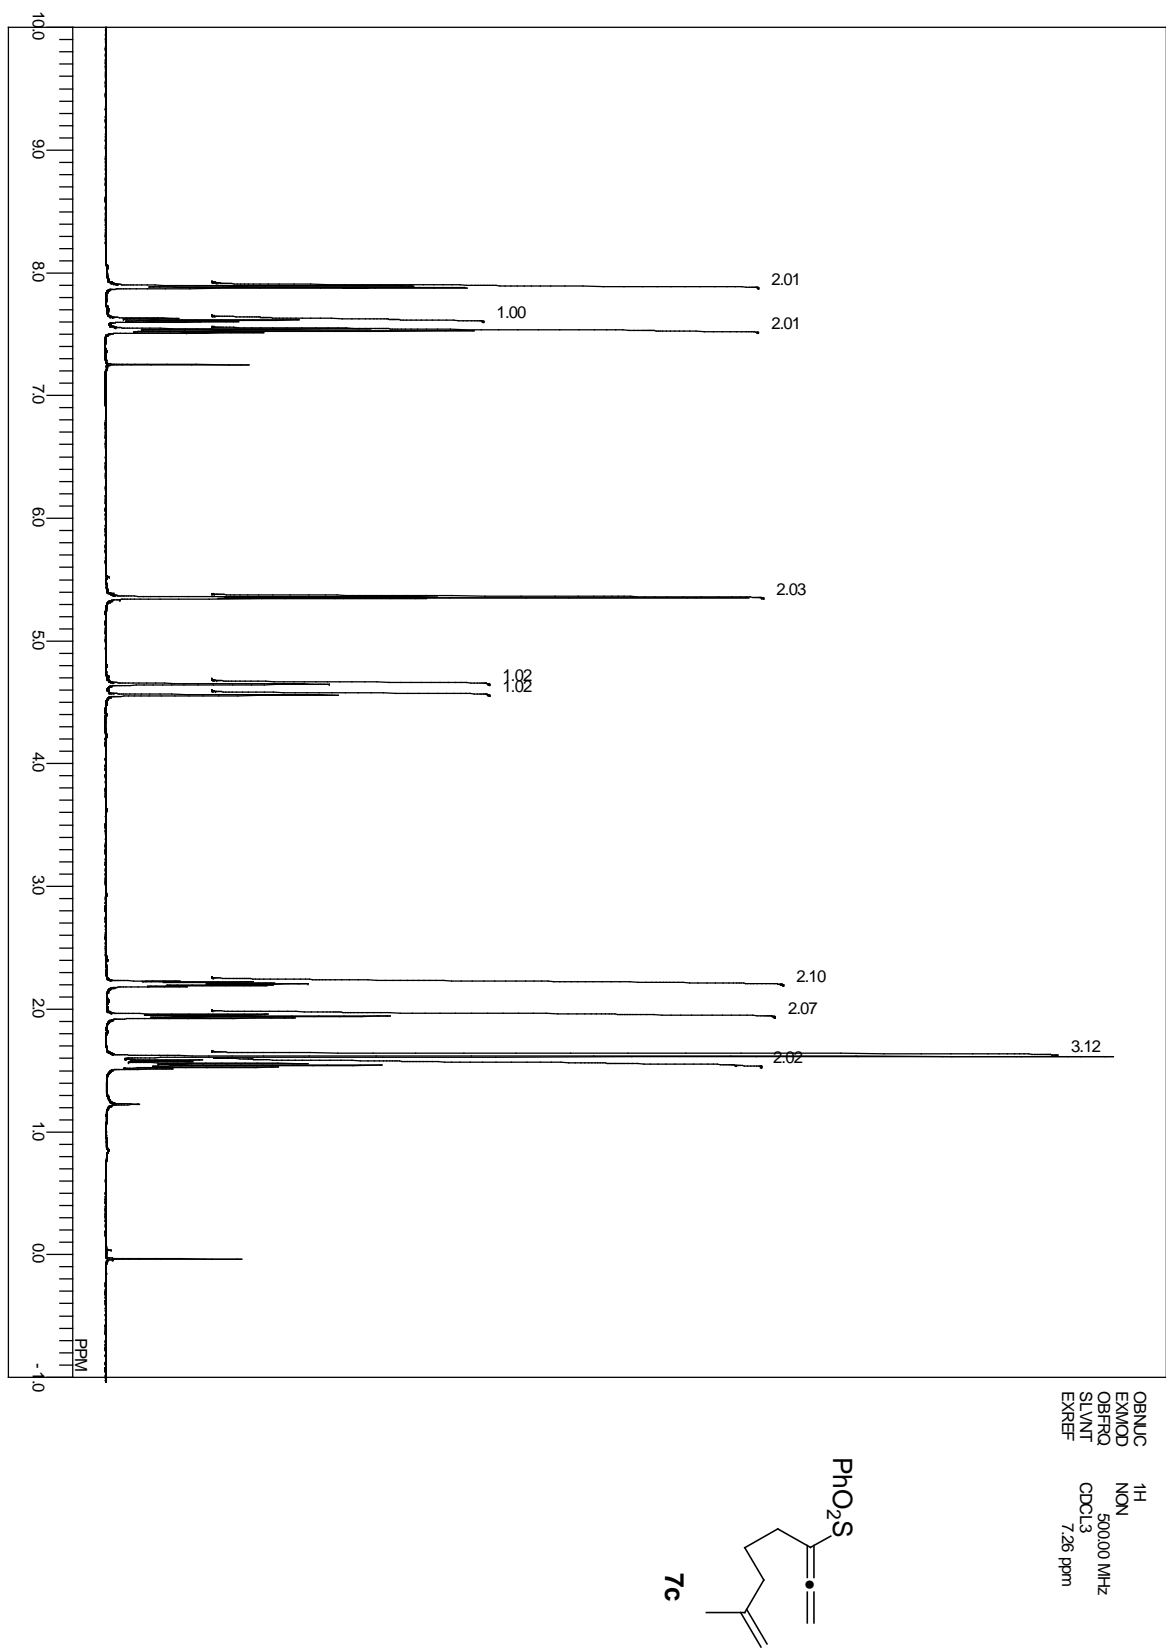

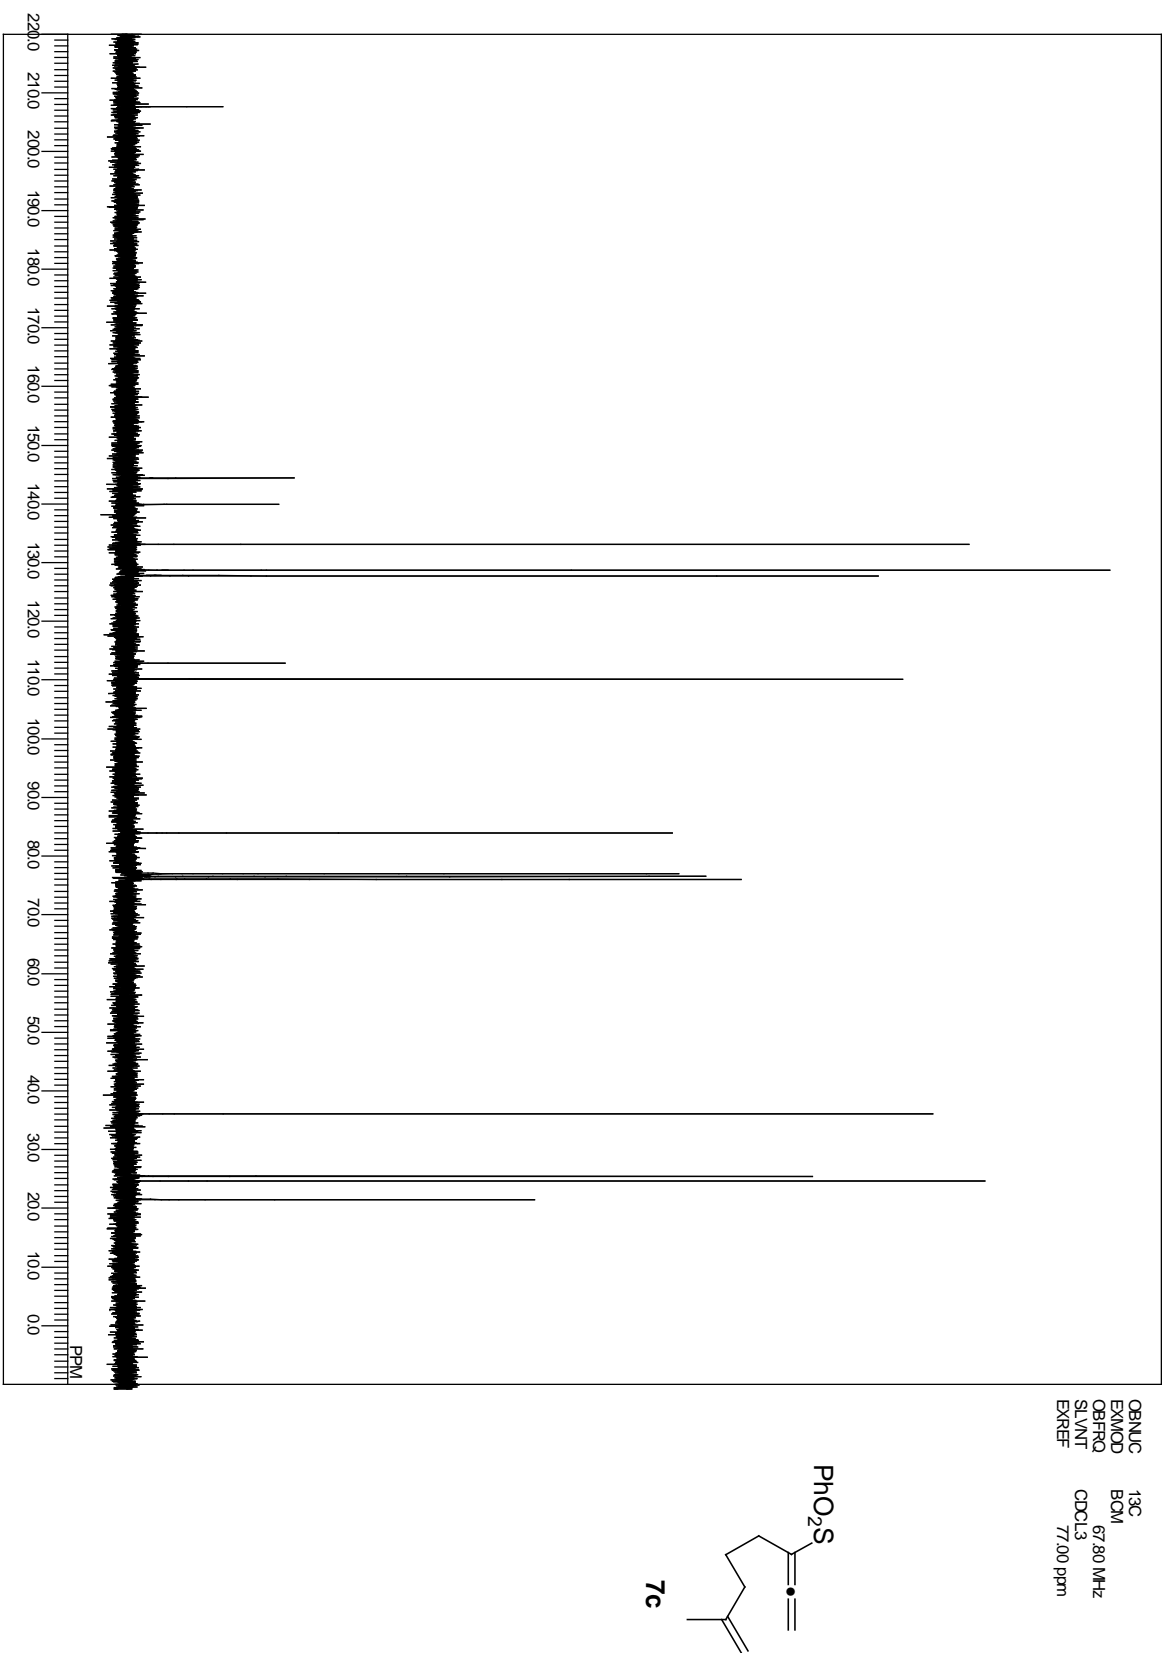

OSBUC  
EXMOD  
OBFRQ  
SLVNT  
EXREF  
  
<sup>1</sup>H  
NON  
500.00 MHz  
CDCl<sub>3</sub>  
0.00 ppm

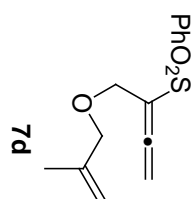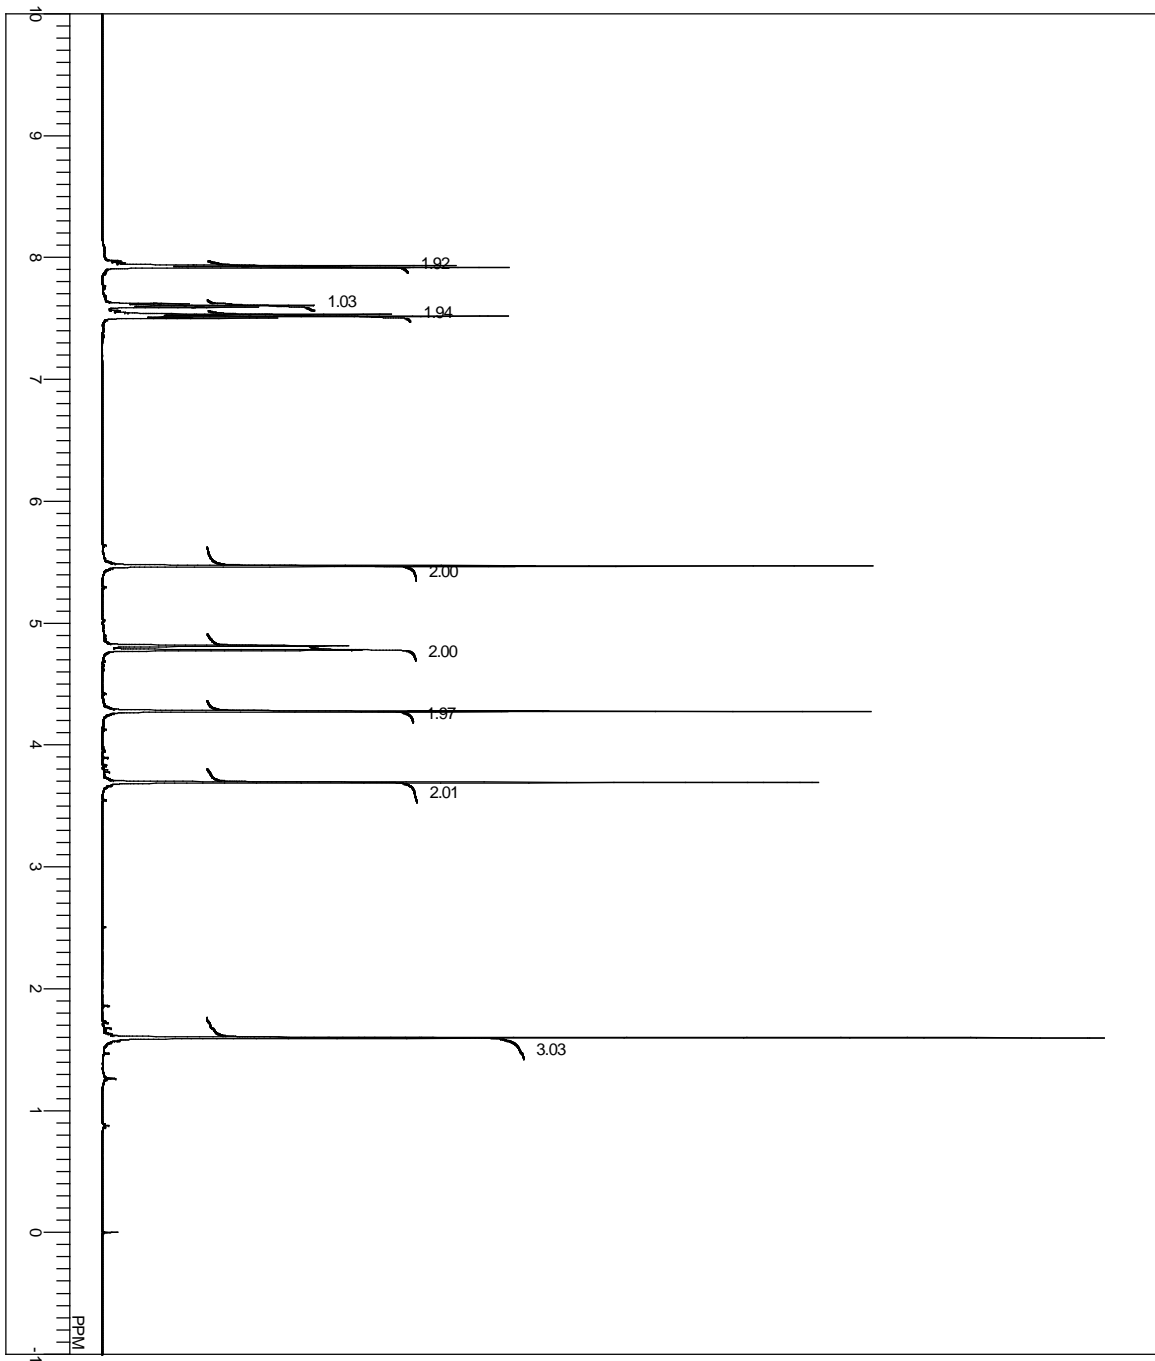





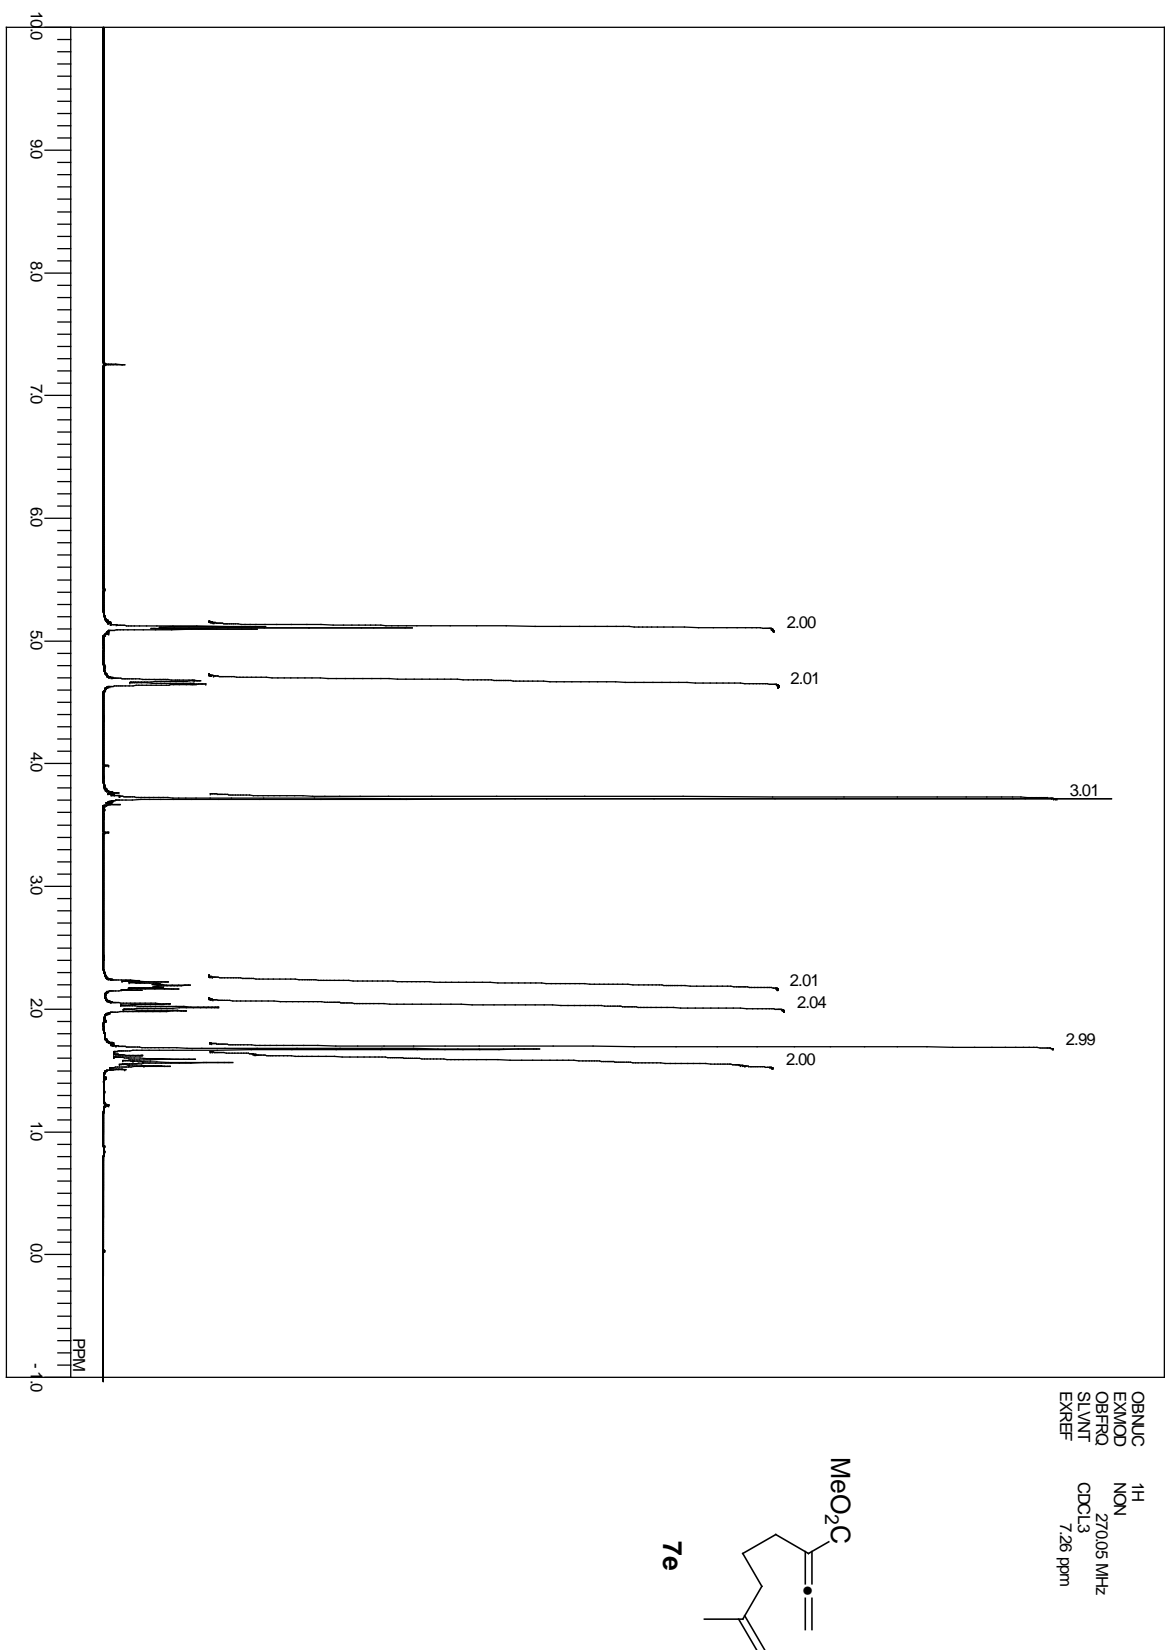

ORNLJC 13C  
EXMCD BOM 67.80 MHz  
OBFRQ  
SLVNT CDCl3  
EXREF 77.00 ppm

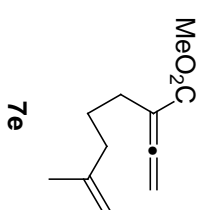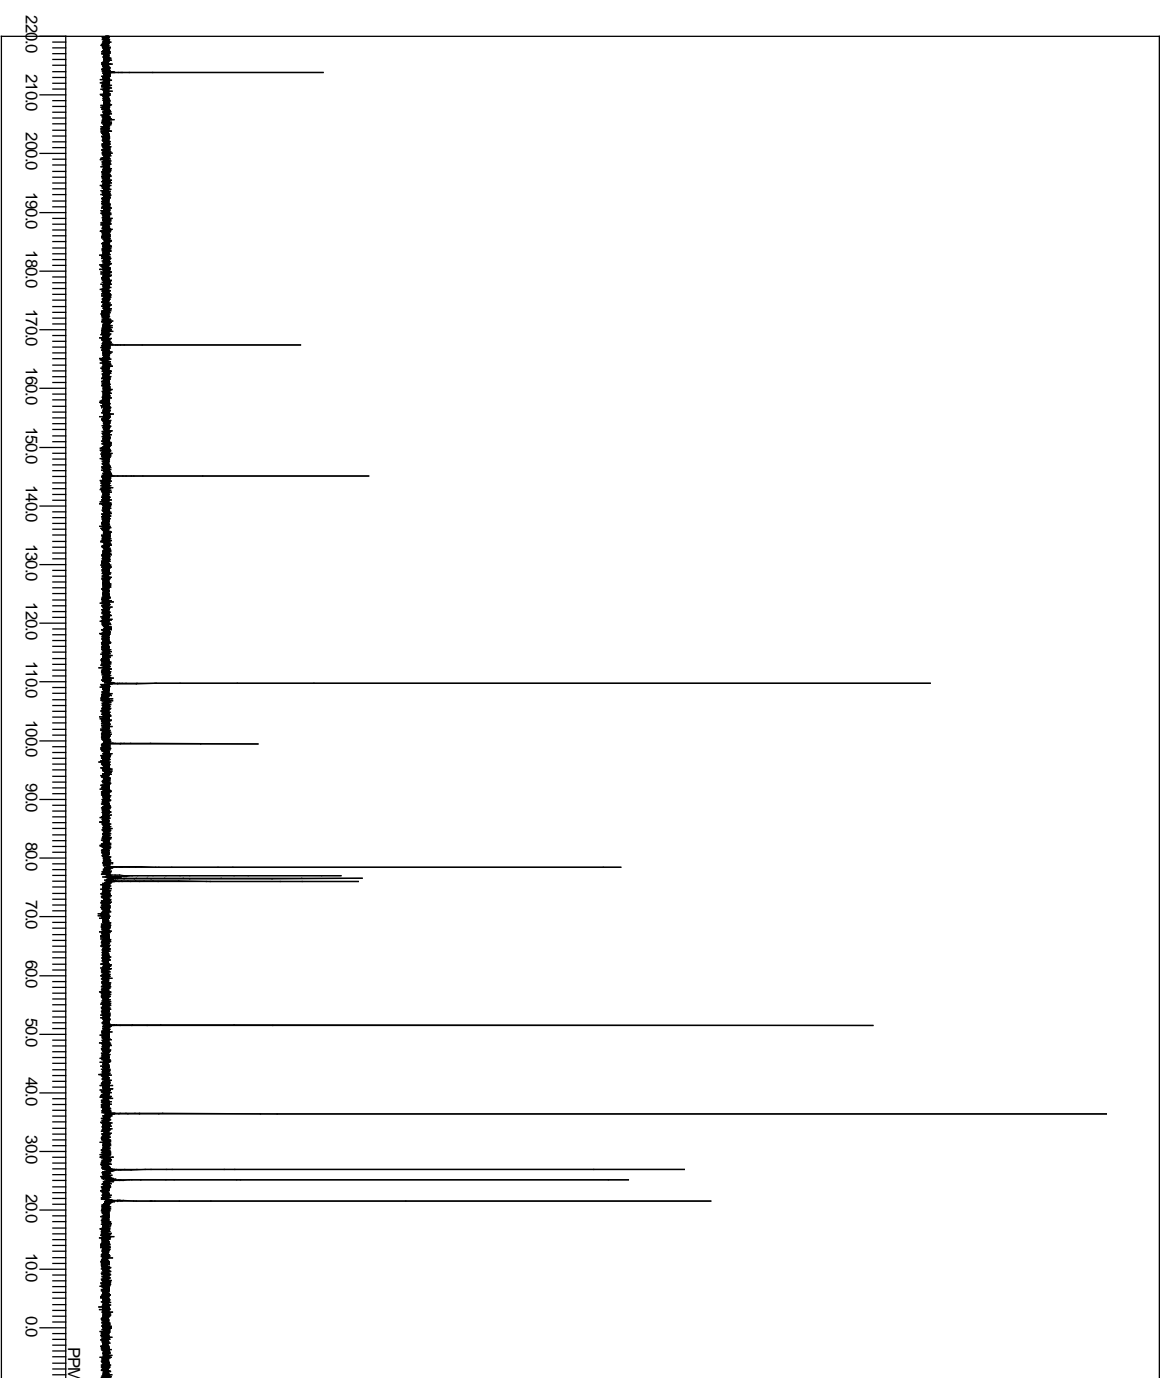

ORNLUC  
EXMOD  
ORFRO  
SLVNT  
EXREF

<sup>1</sup>H  
NON  
270.05 MHz  
CDCL<sub>3</sub>  
7.24 ppm

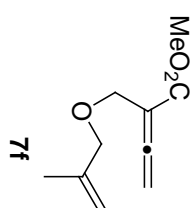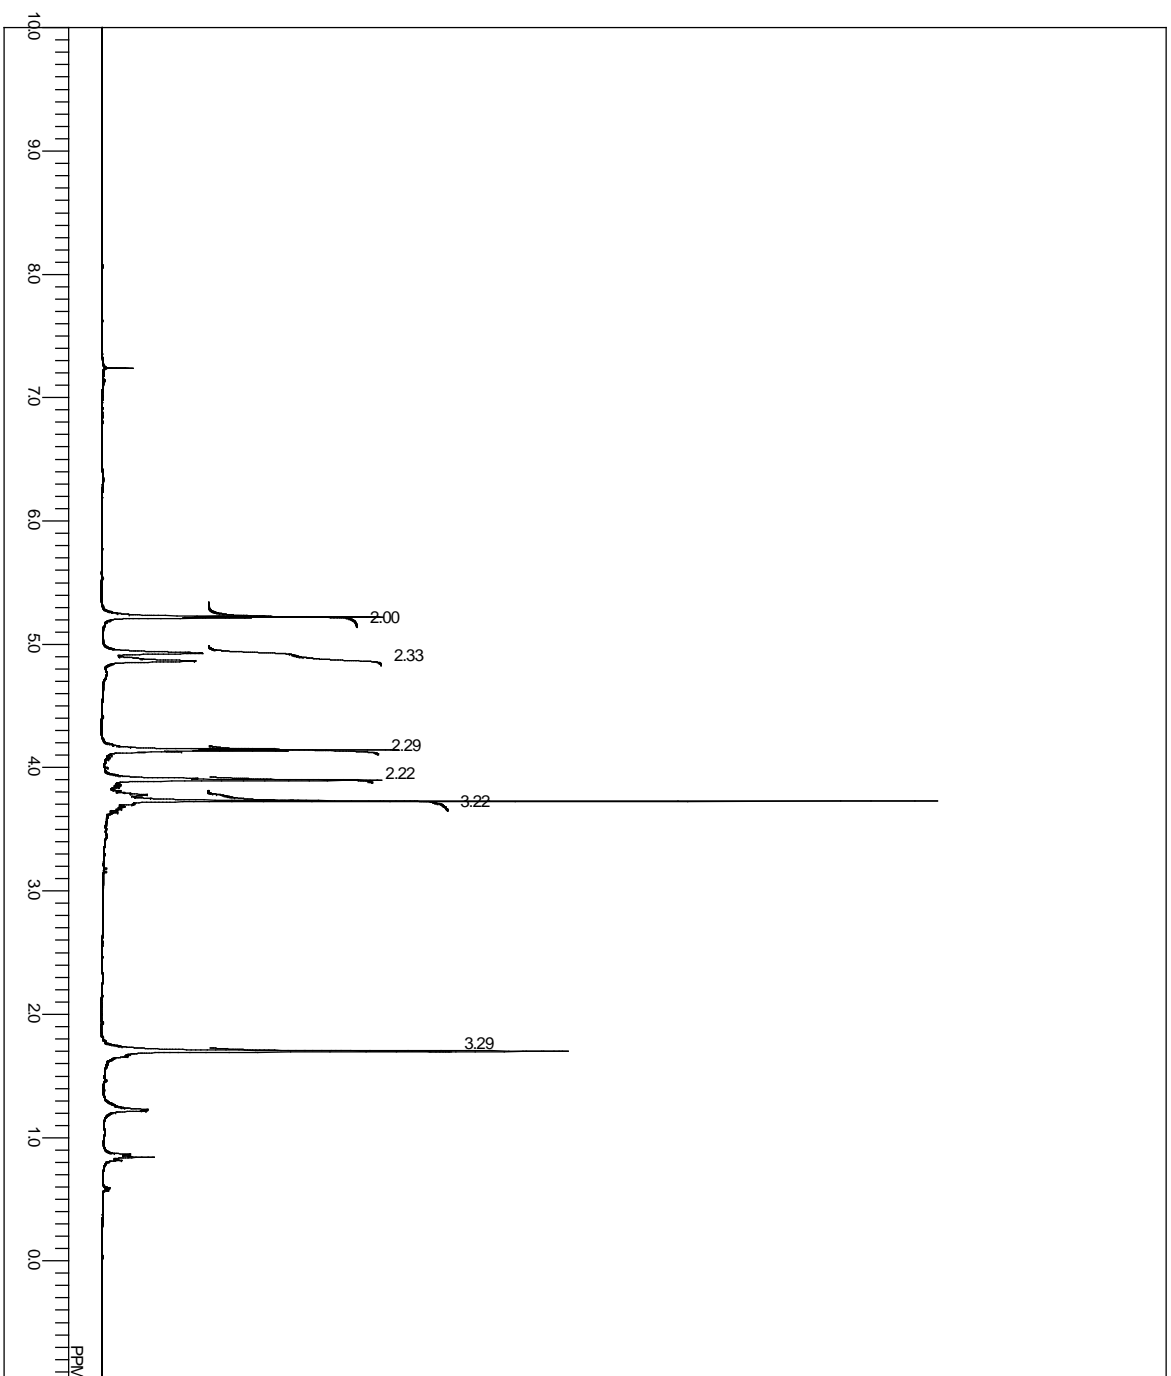

ORNLUC <sup>13</sup>C  
EXMCD single pulse dec  
OBFRC 100.53 MHz  
SLVNT CDCL<sub>3</sub>  
EXREF 77.00 ppm

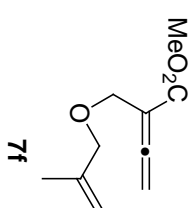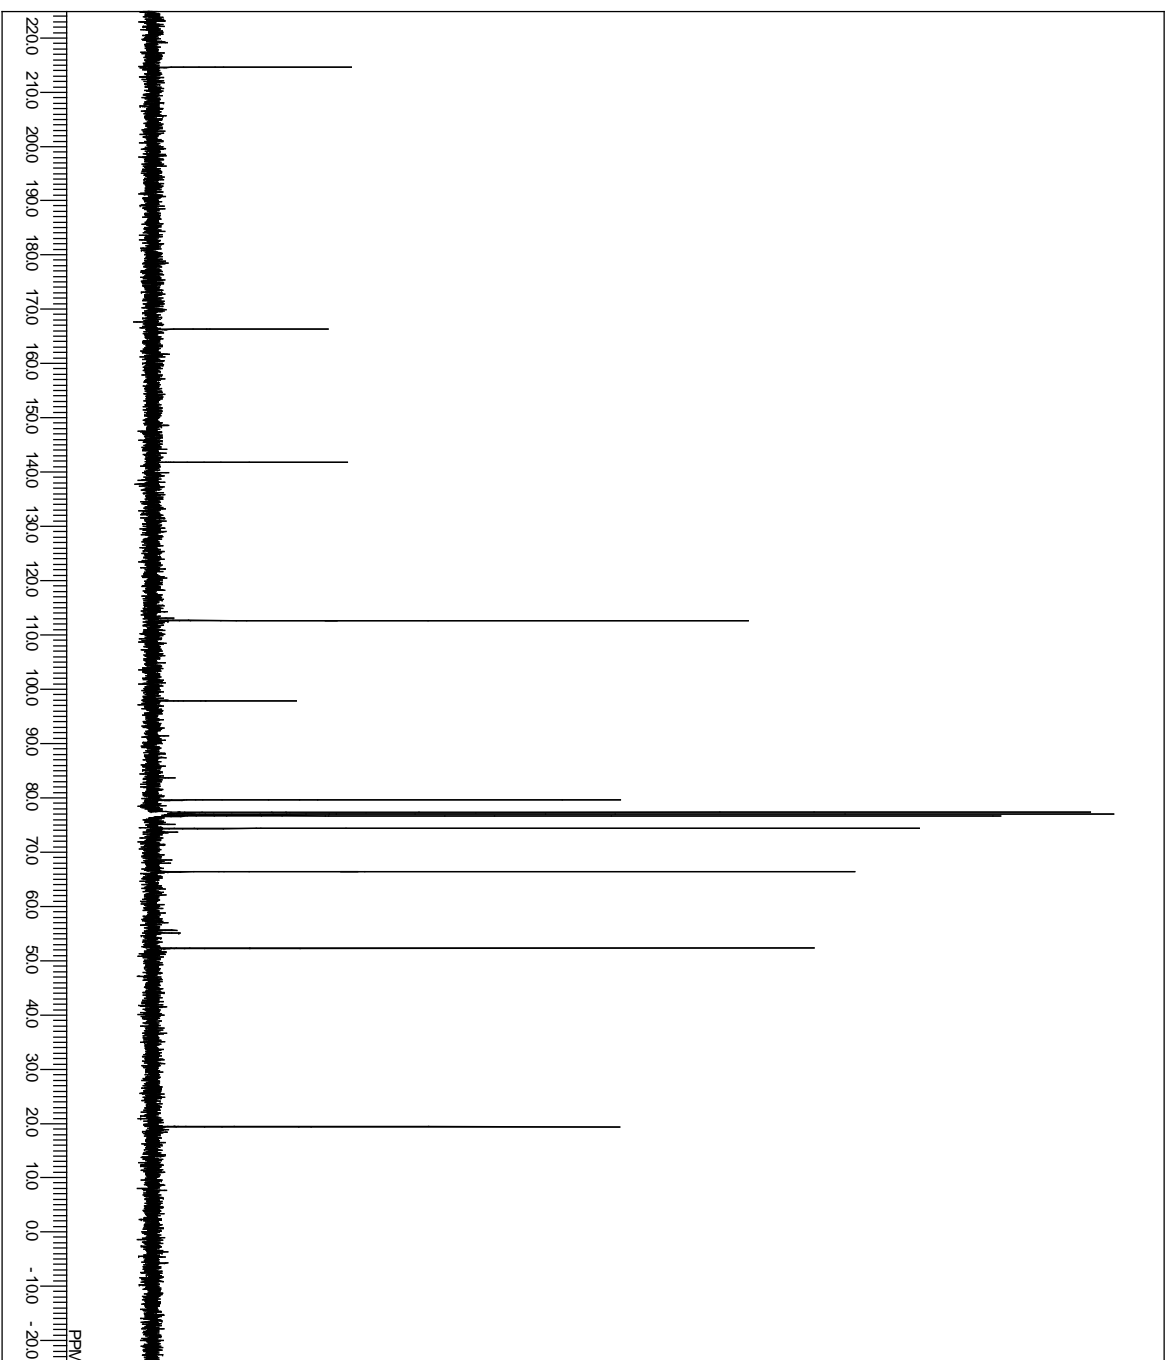

<sup>1</sup>H  
NON  
500.00 MHz  
CDCl<sub>3</sub>  
7.26 ppm  
EXREF

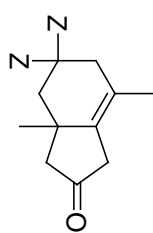

Z = CO<sub>2</sub>Me

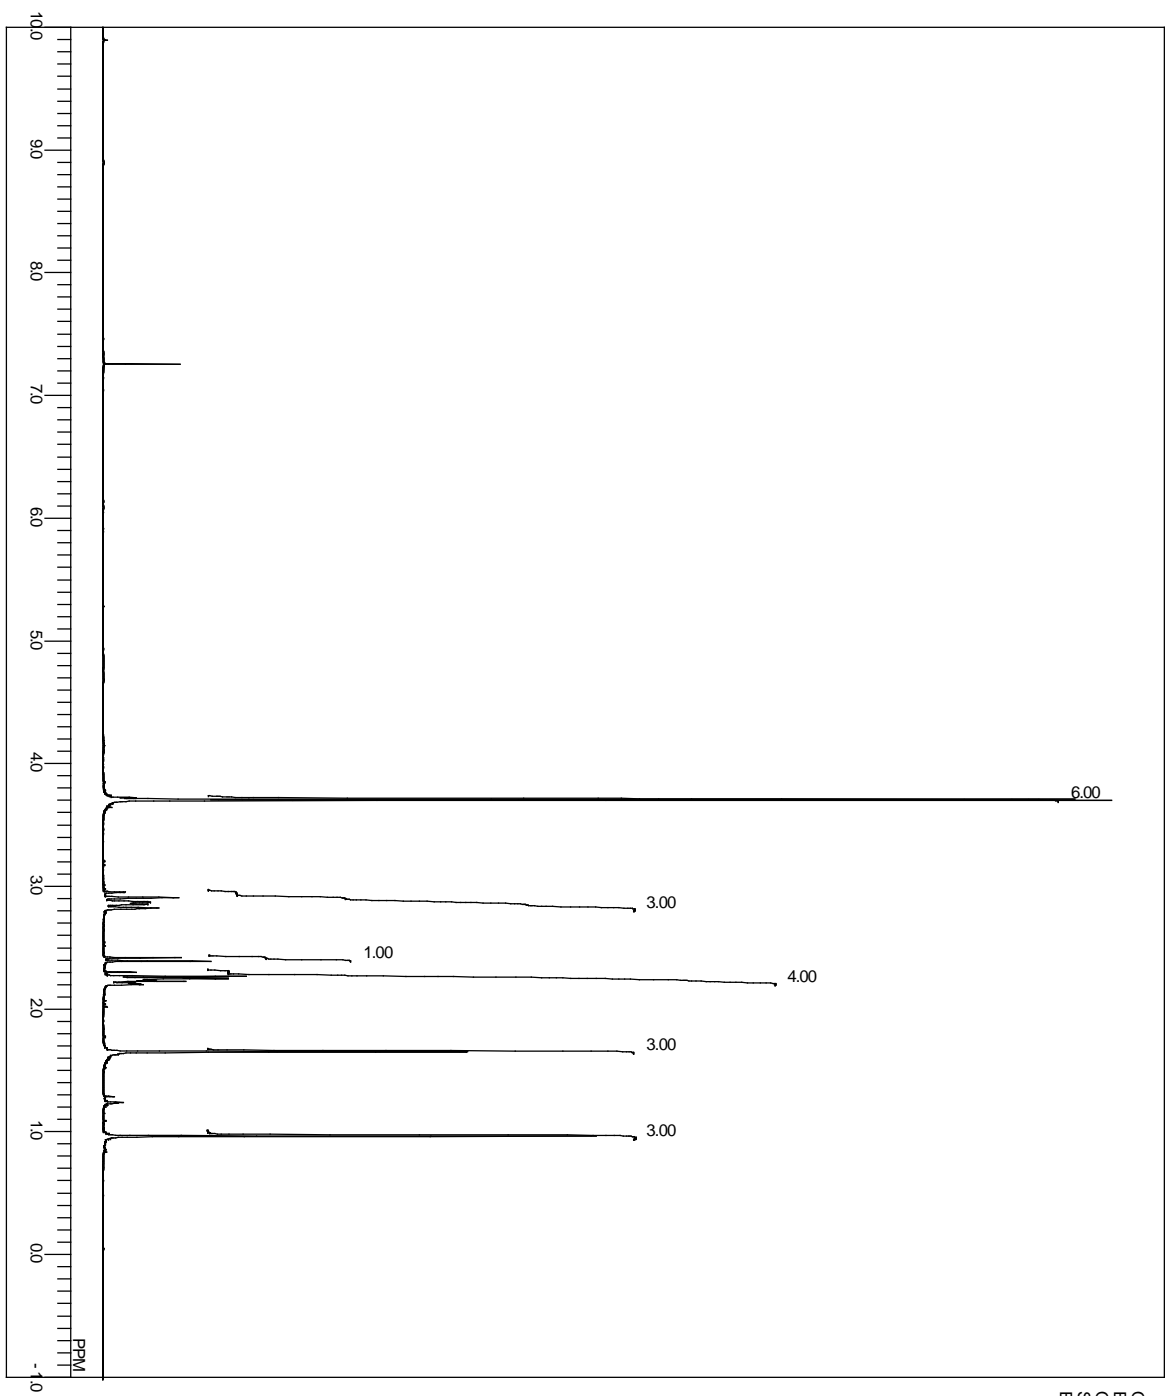

ORNLJC  
EXMCD  
OBFRQ  
SLVNT  
EXREF

<sup>13</sup>C  
BOM  
125.65 MHz  
CDCl<sub>3</sub>  
77.00 ppm

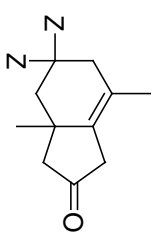

Z = CO<sub>2</sub>Me

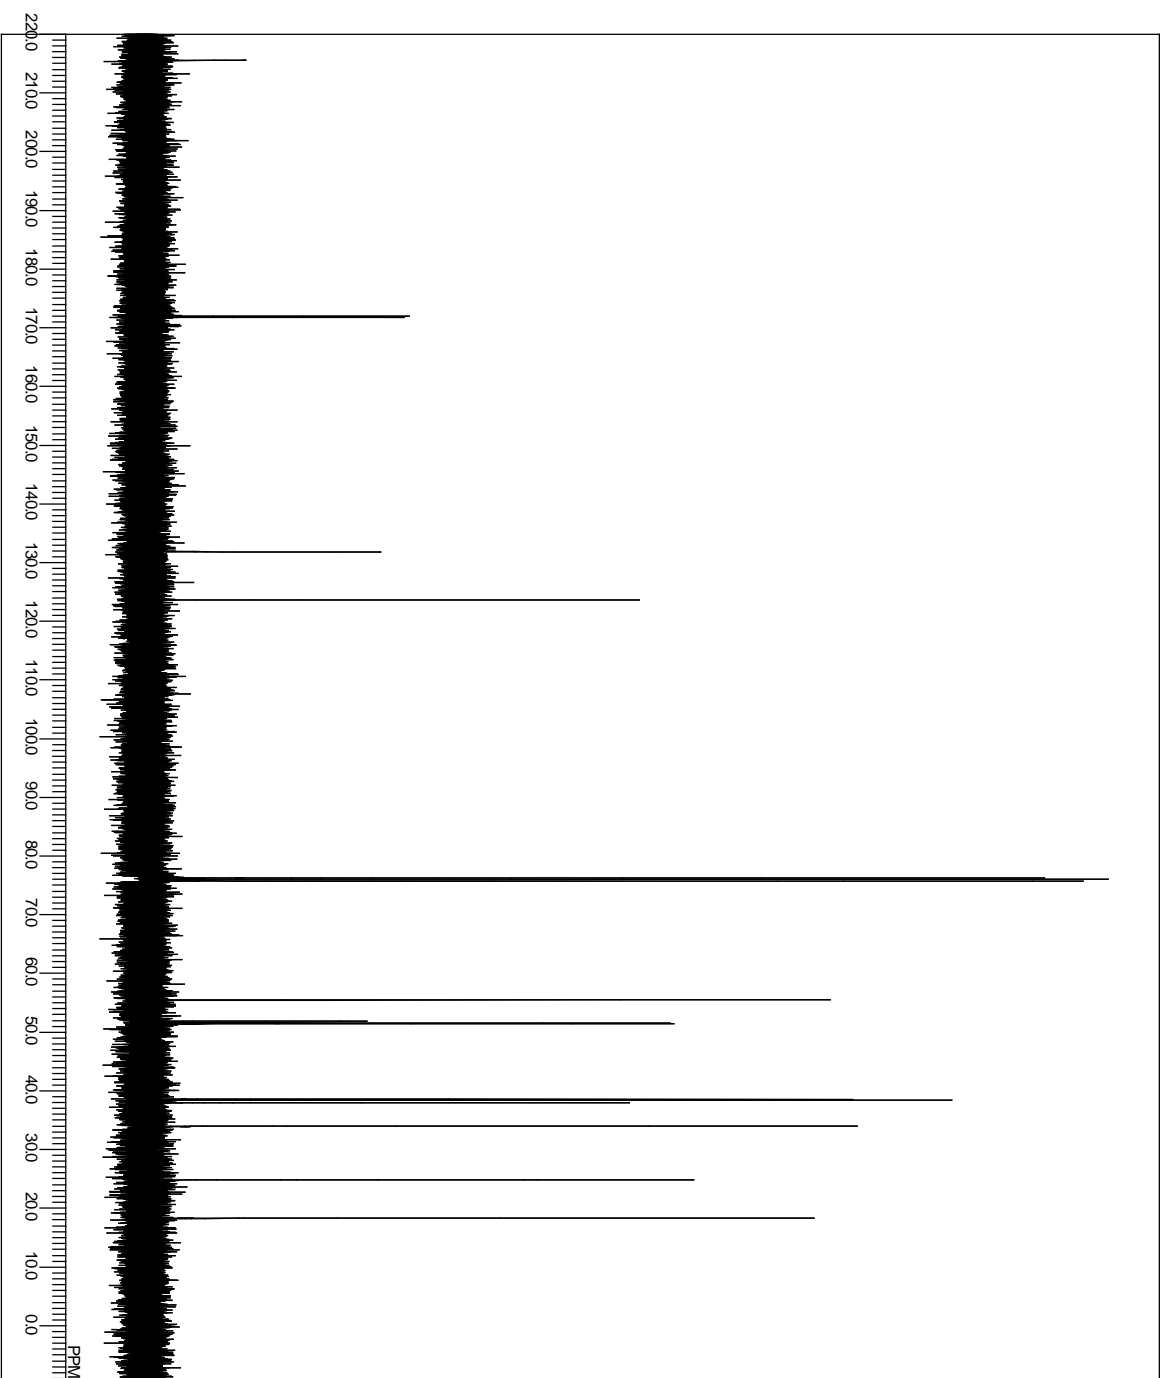

OBNUC  
EXMCD  
OBFRO  
SLVNT  
EXREF

<sup>1</sup>H  
NMR  
500.00 MHz  
CDCl<sub>3</sub>  
7.26 ppm

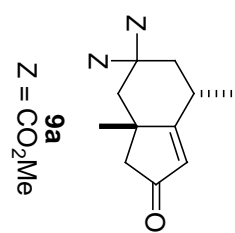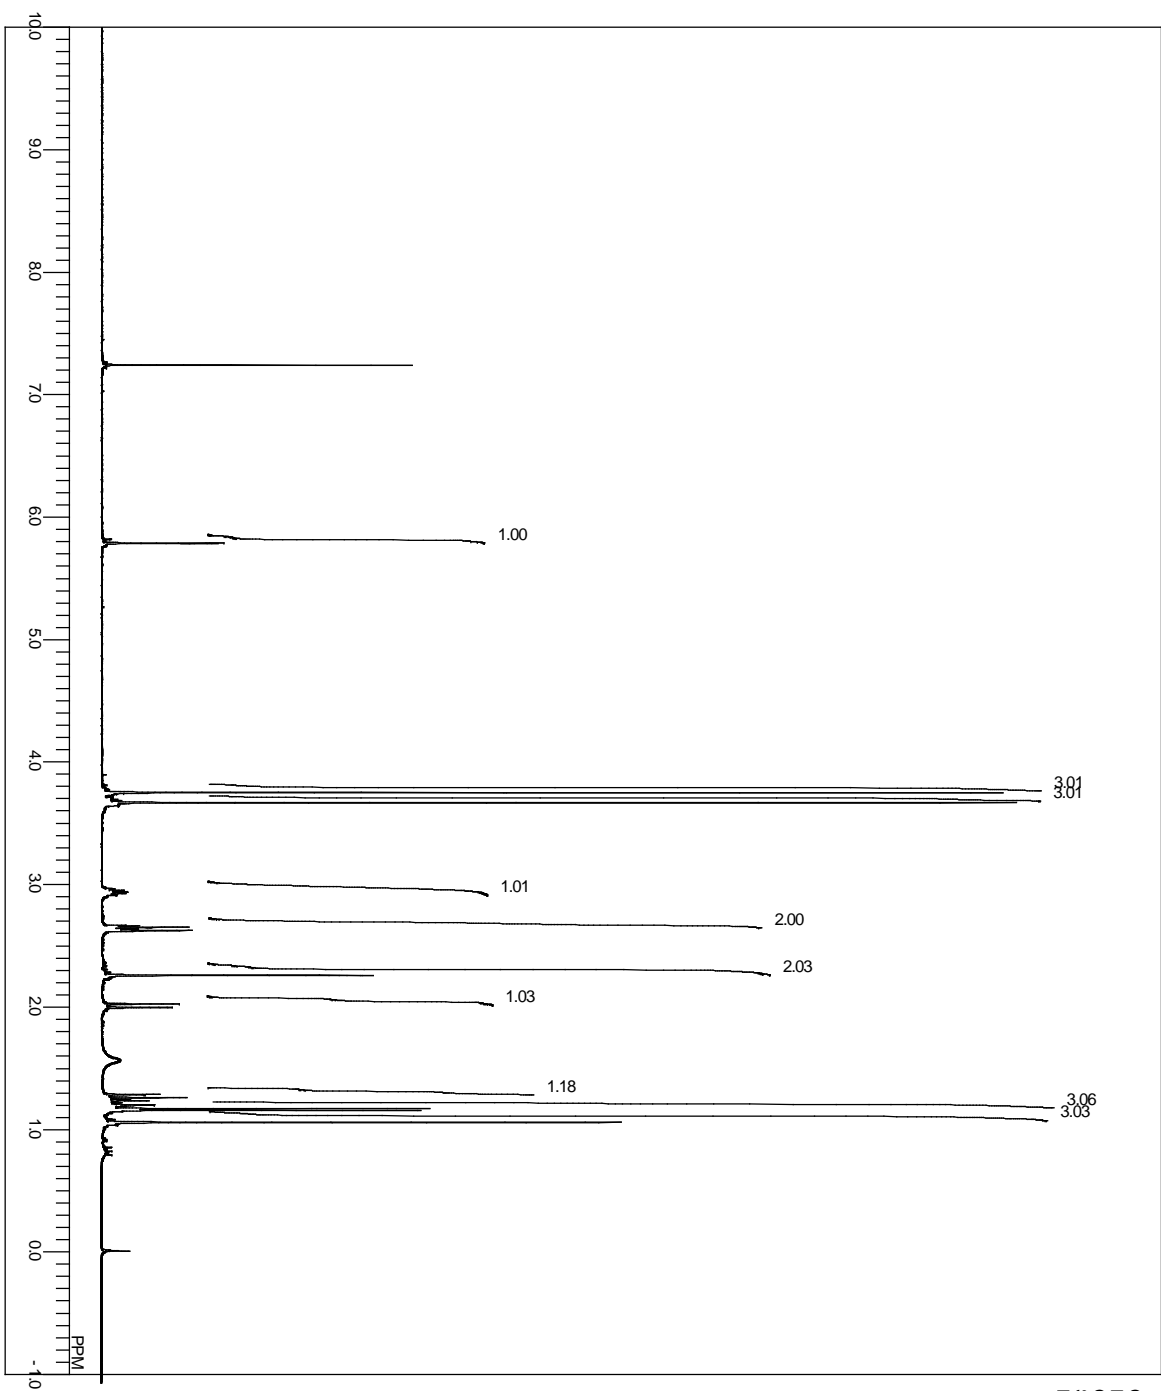



ORNLJC <sup>13</sup>C  
EXMOD BCM  
OBFRQ 125.65 MHz  
SLVNT CDCl<sub>3</sub>  
EXREF 77.00 ppm

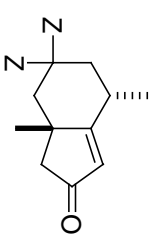

Z = CO<sub>2</sub>Me

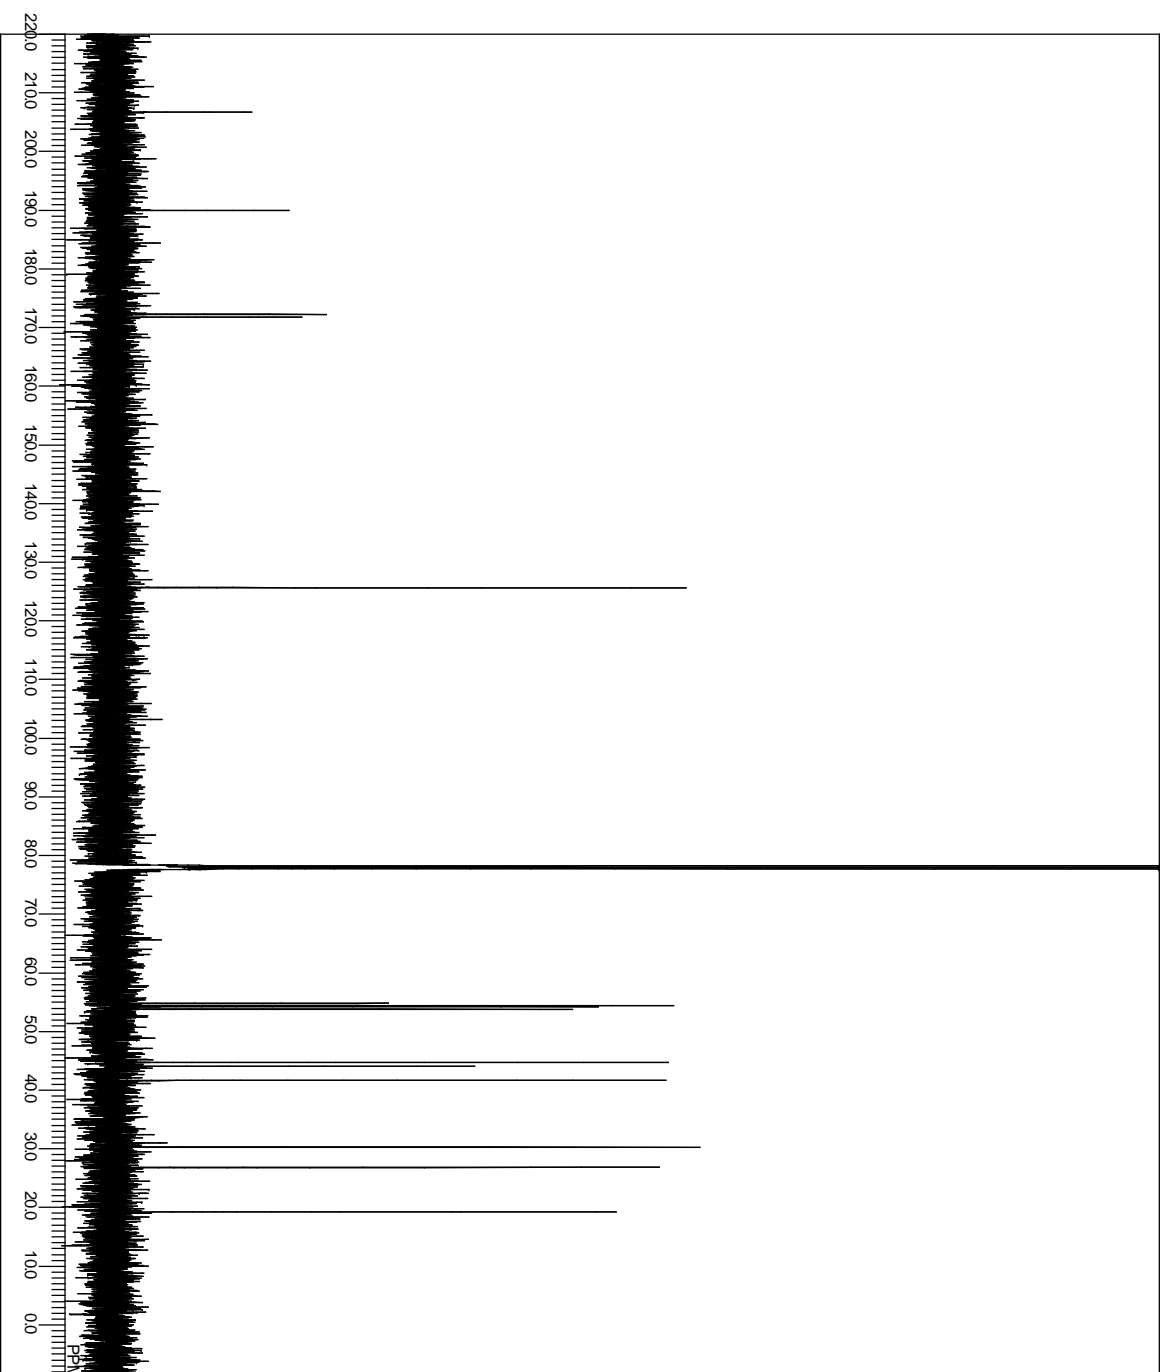

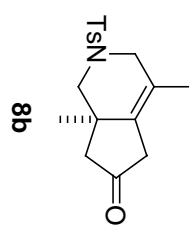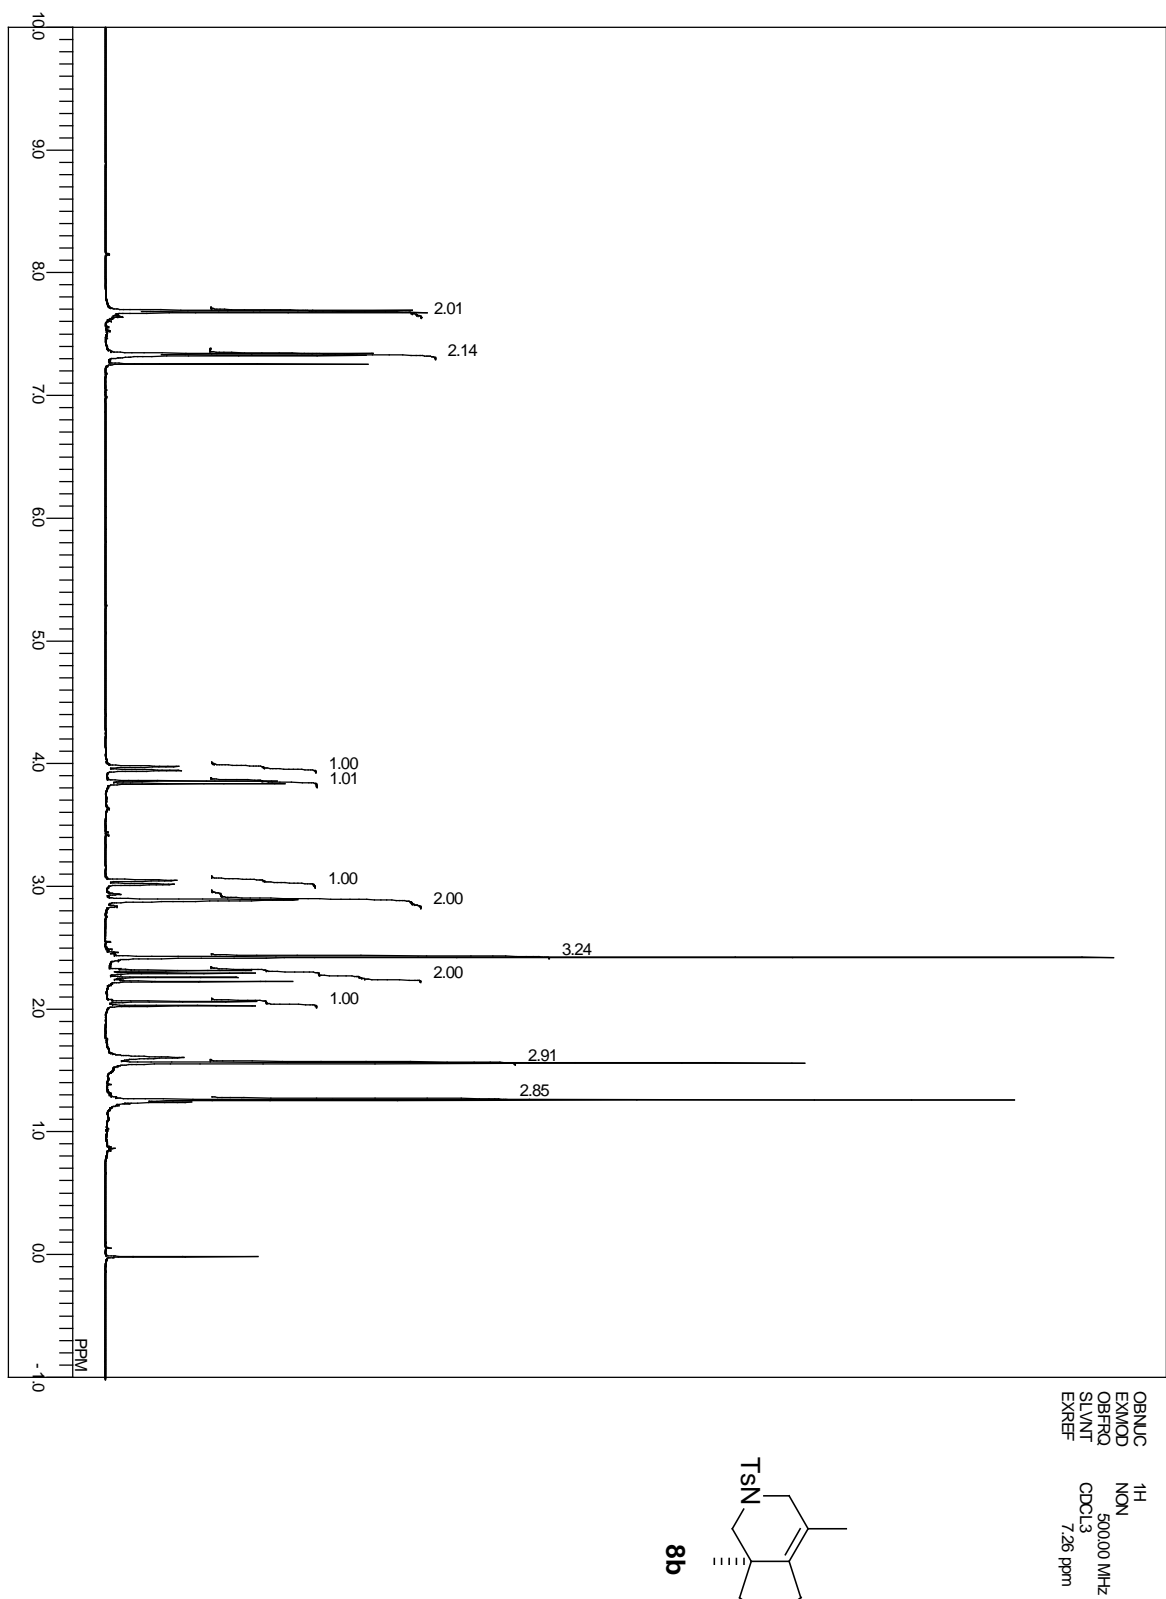

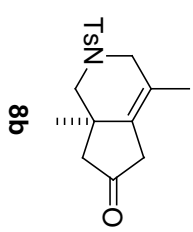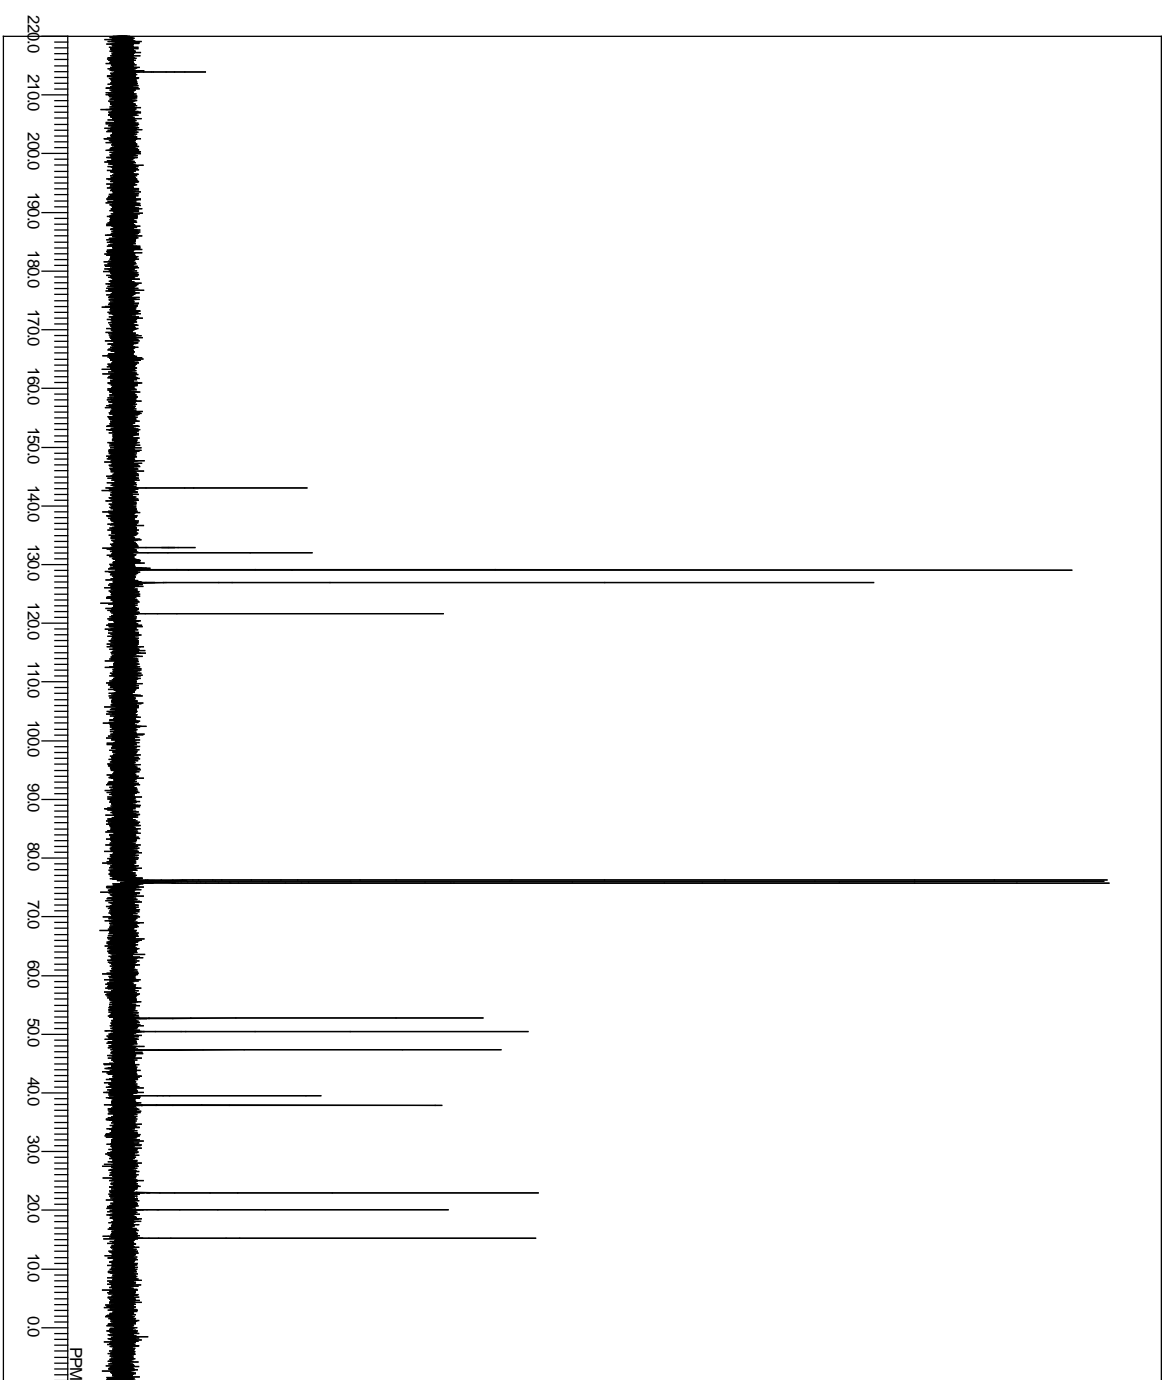

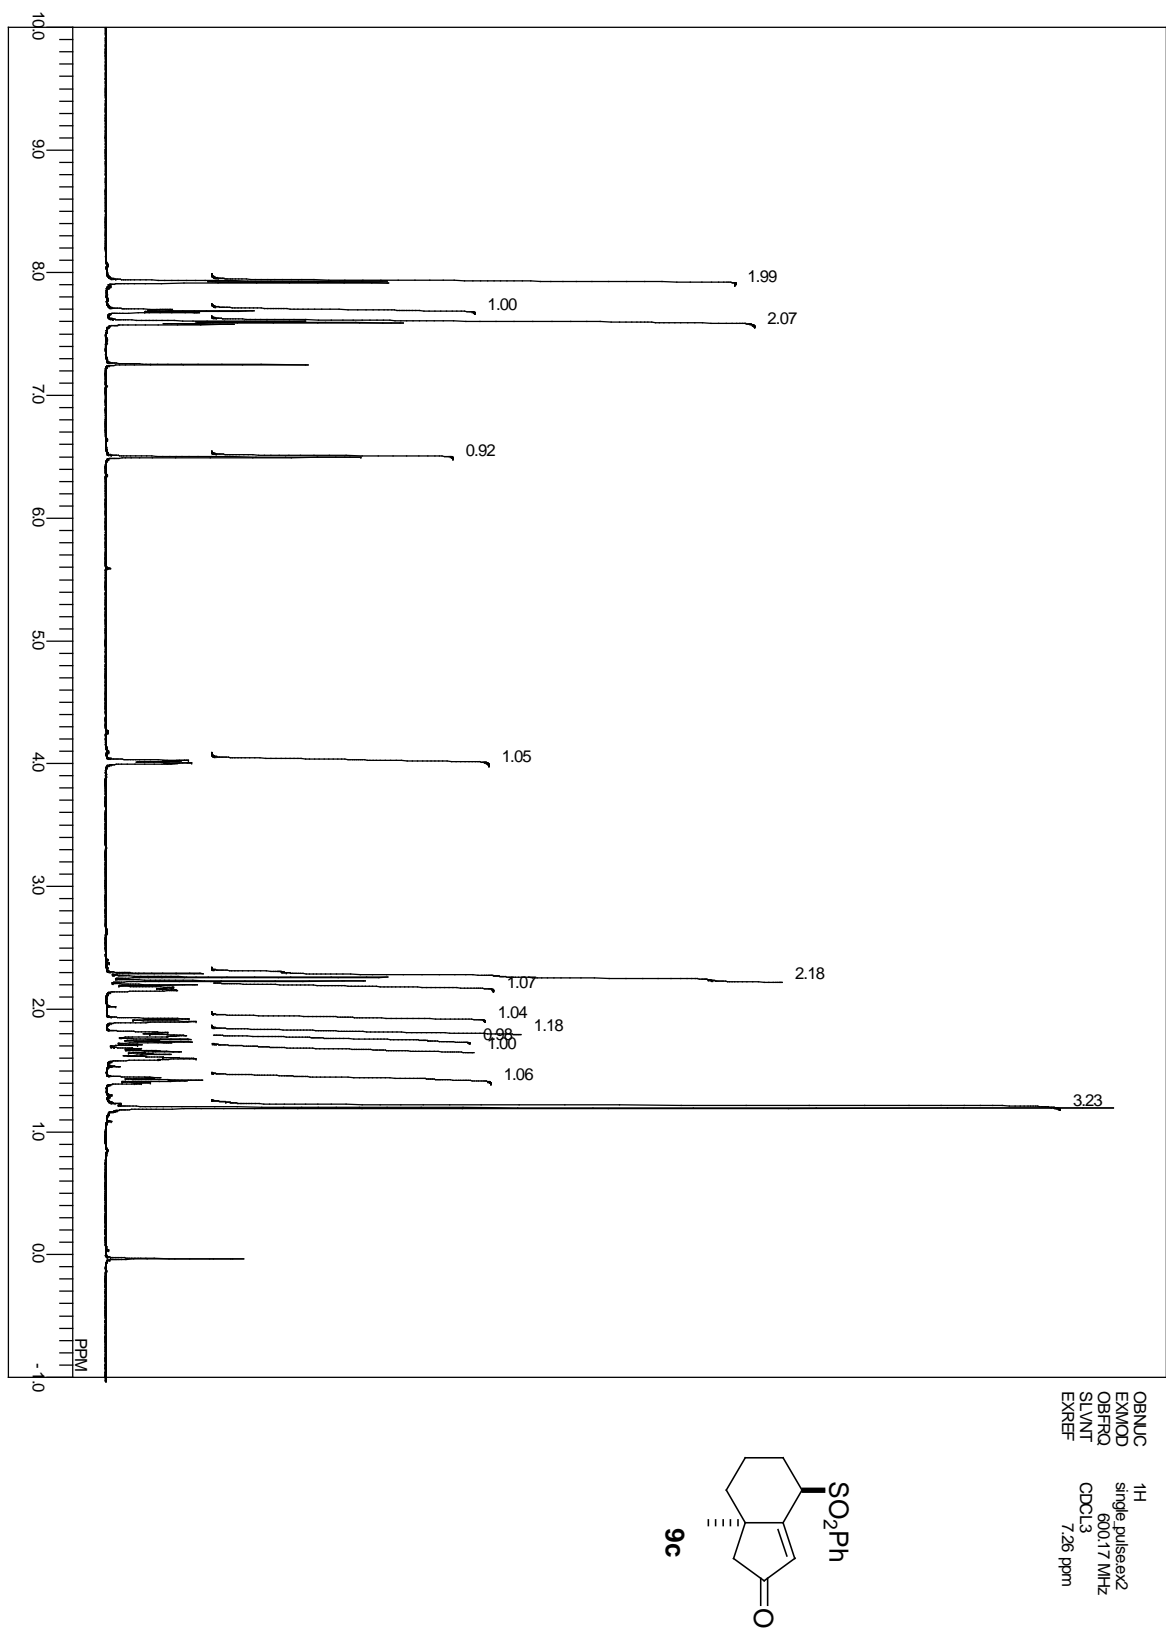

<sup>13</sup>C  
OBNUC EXMCD  
OBFRQ single pulse dec  
SLVNT CDCl<sub>3</sub>  
EXREF 77.00 ppm

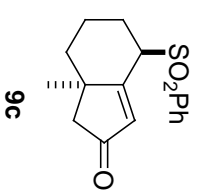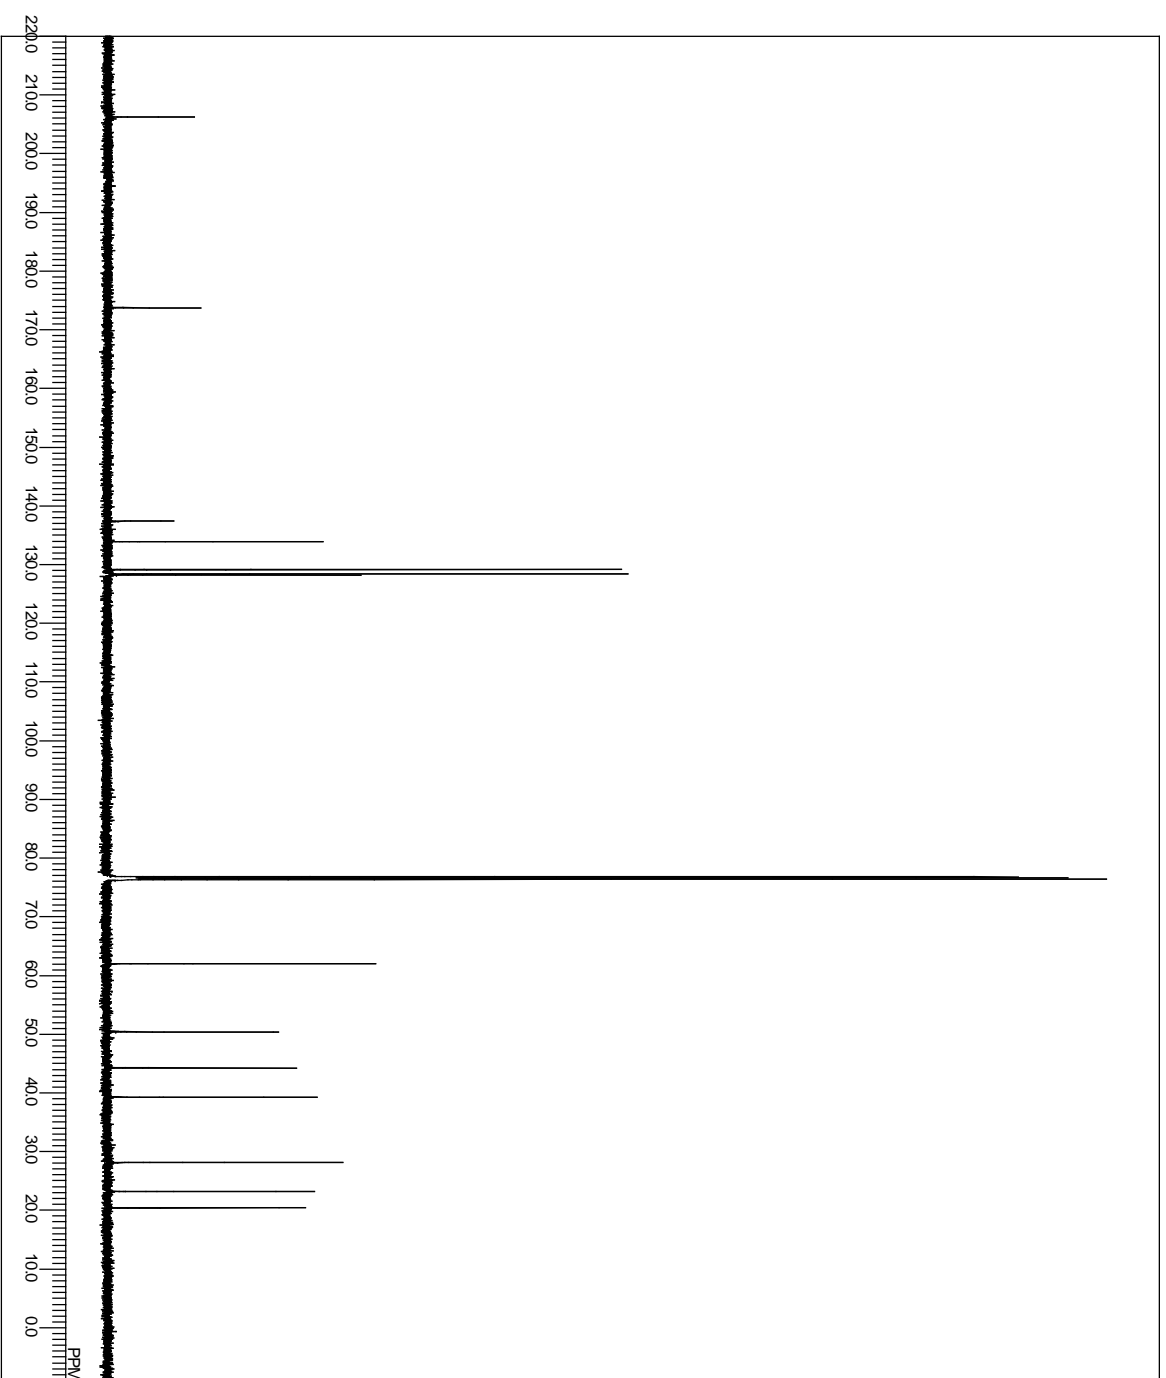

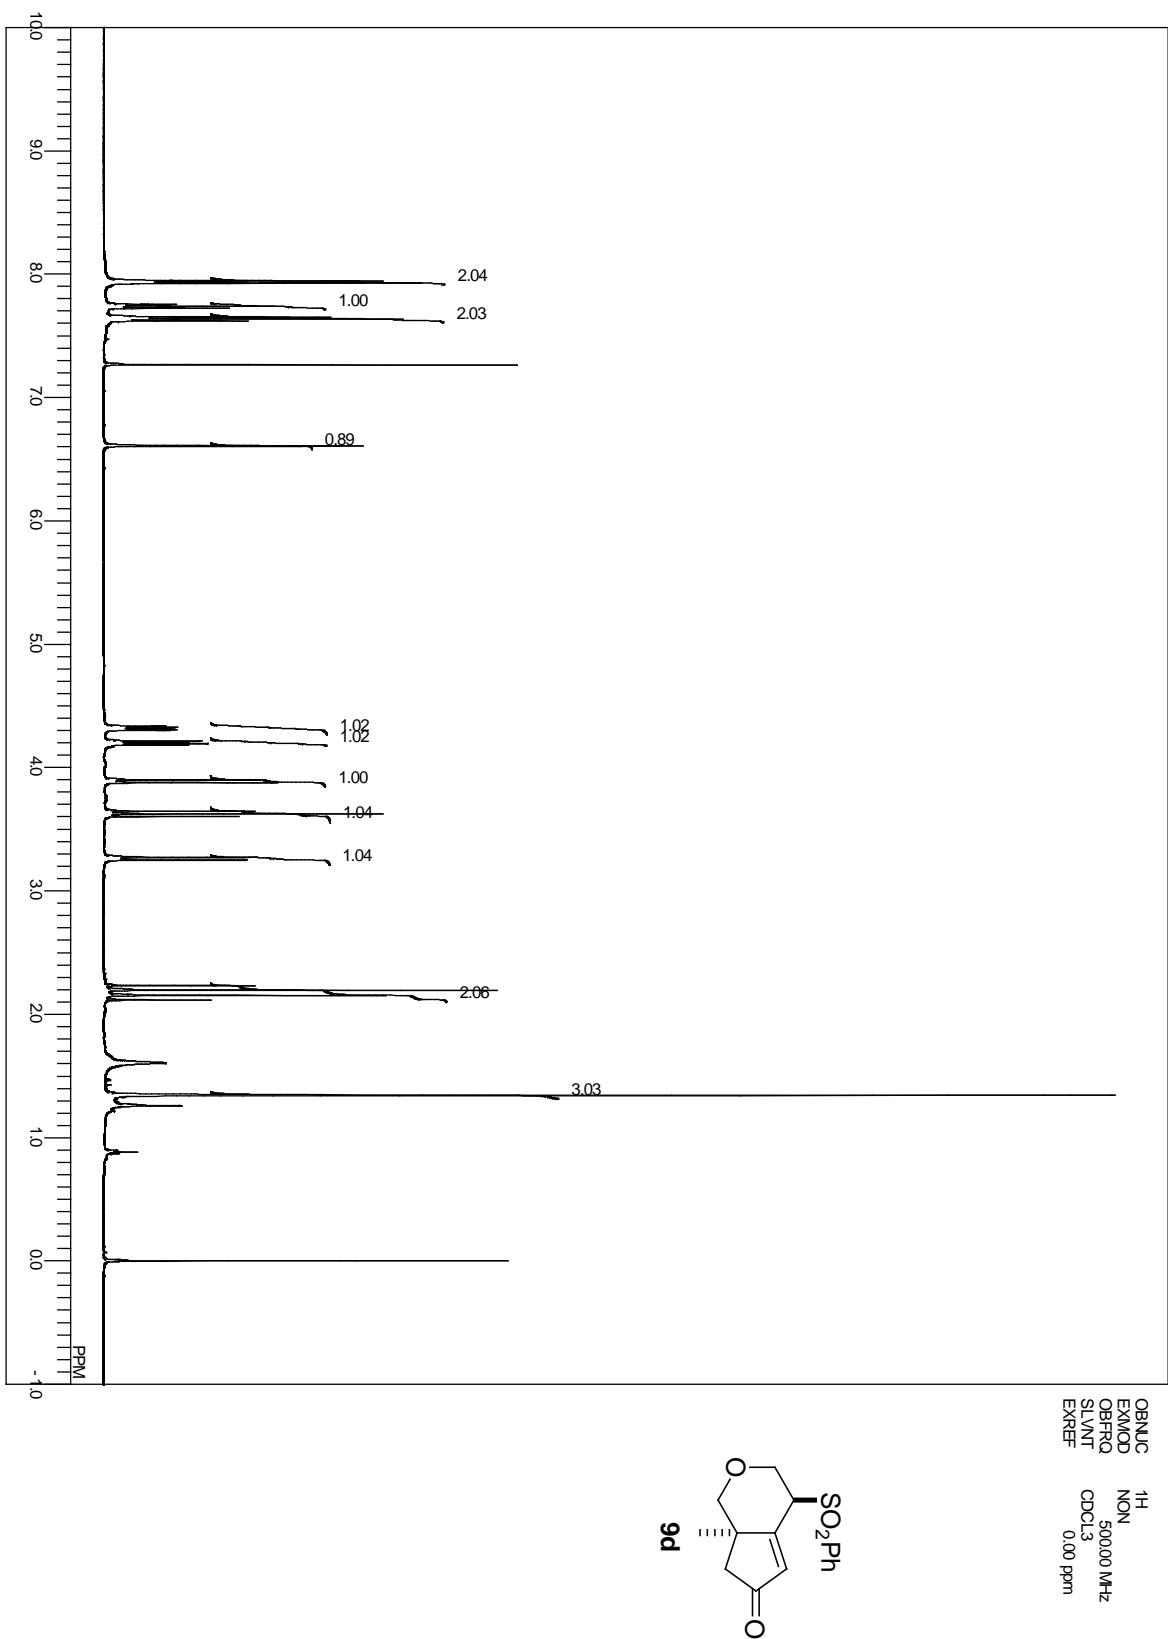

OBNUC <sup>13</sup>C  
EXMOD single pulse dec  
OBFRQ 100.53 MHz  
SLVNT CDCl<sub>3</sub>  
EXREF 77.00 ppm

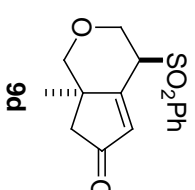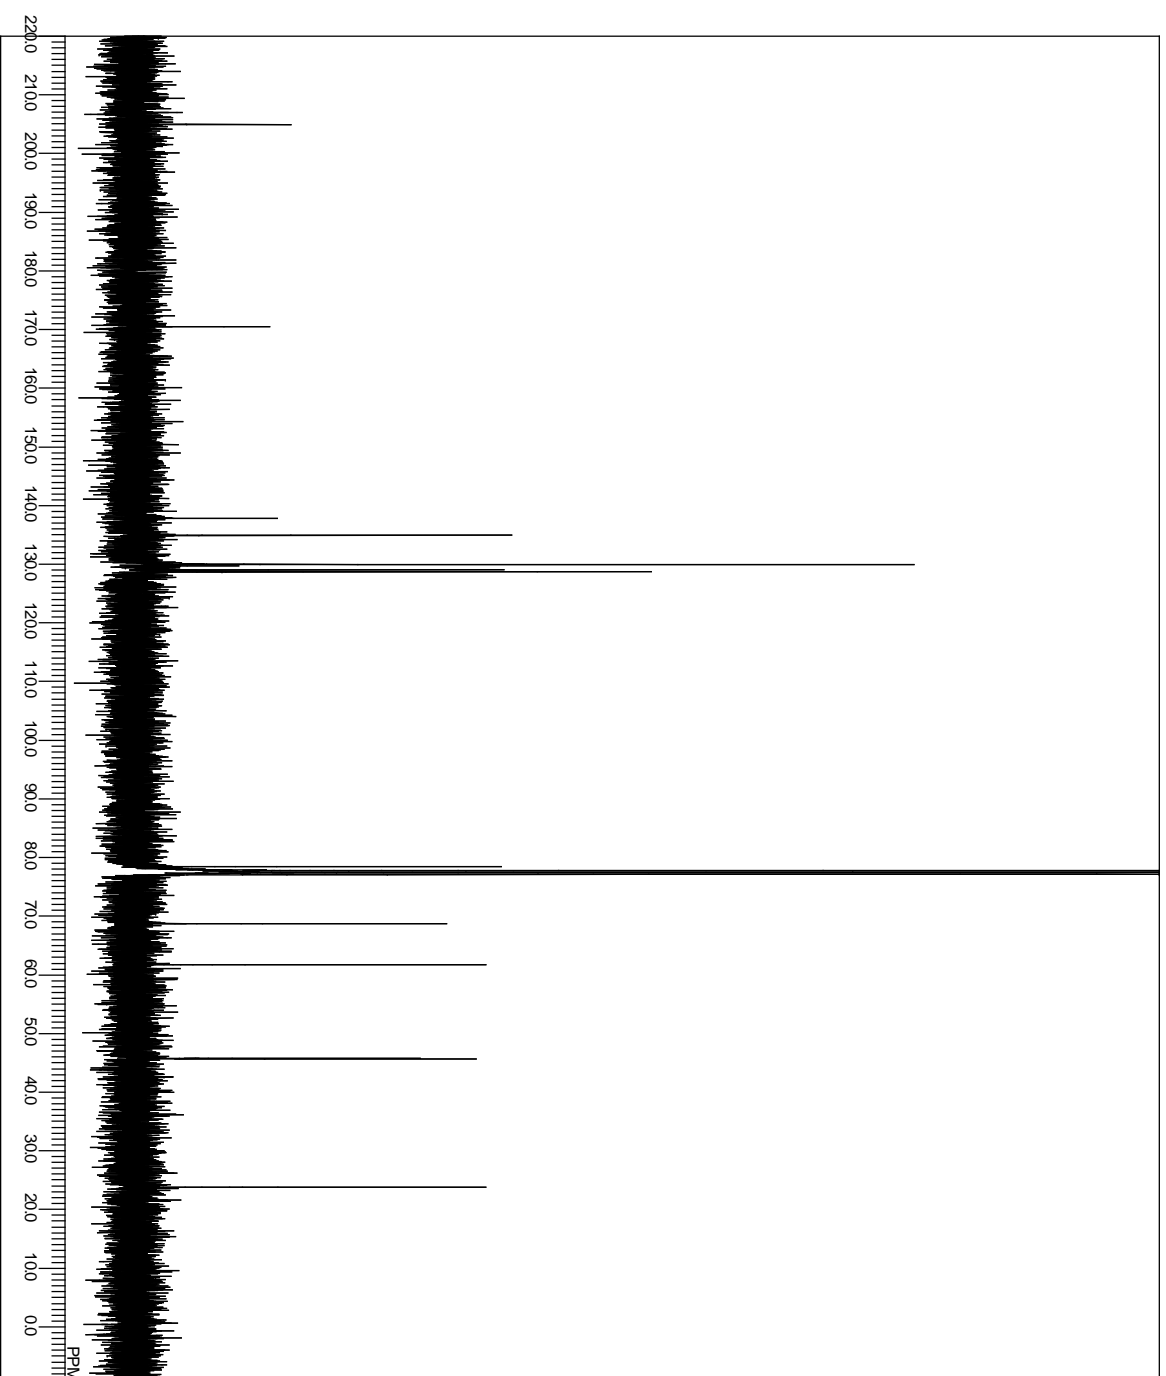

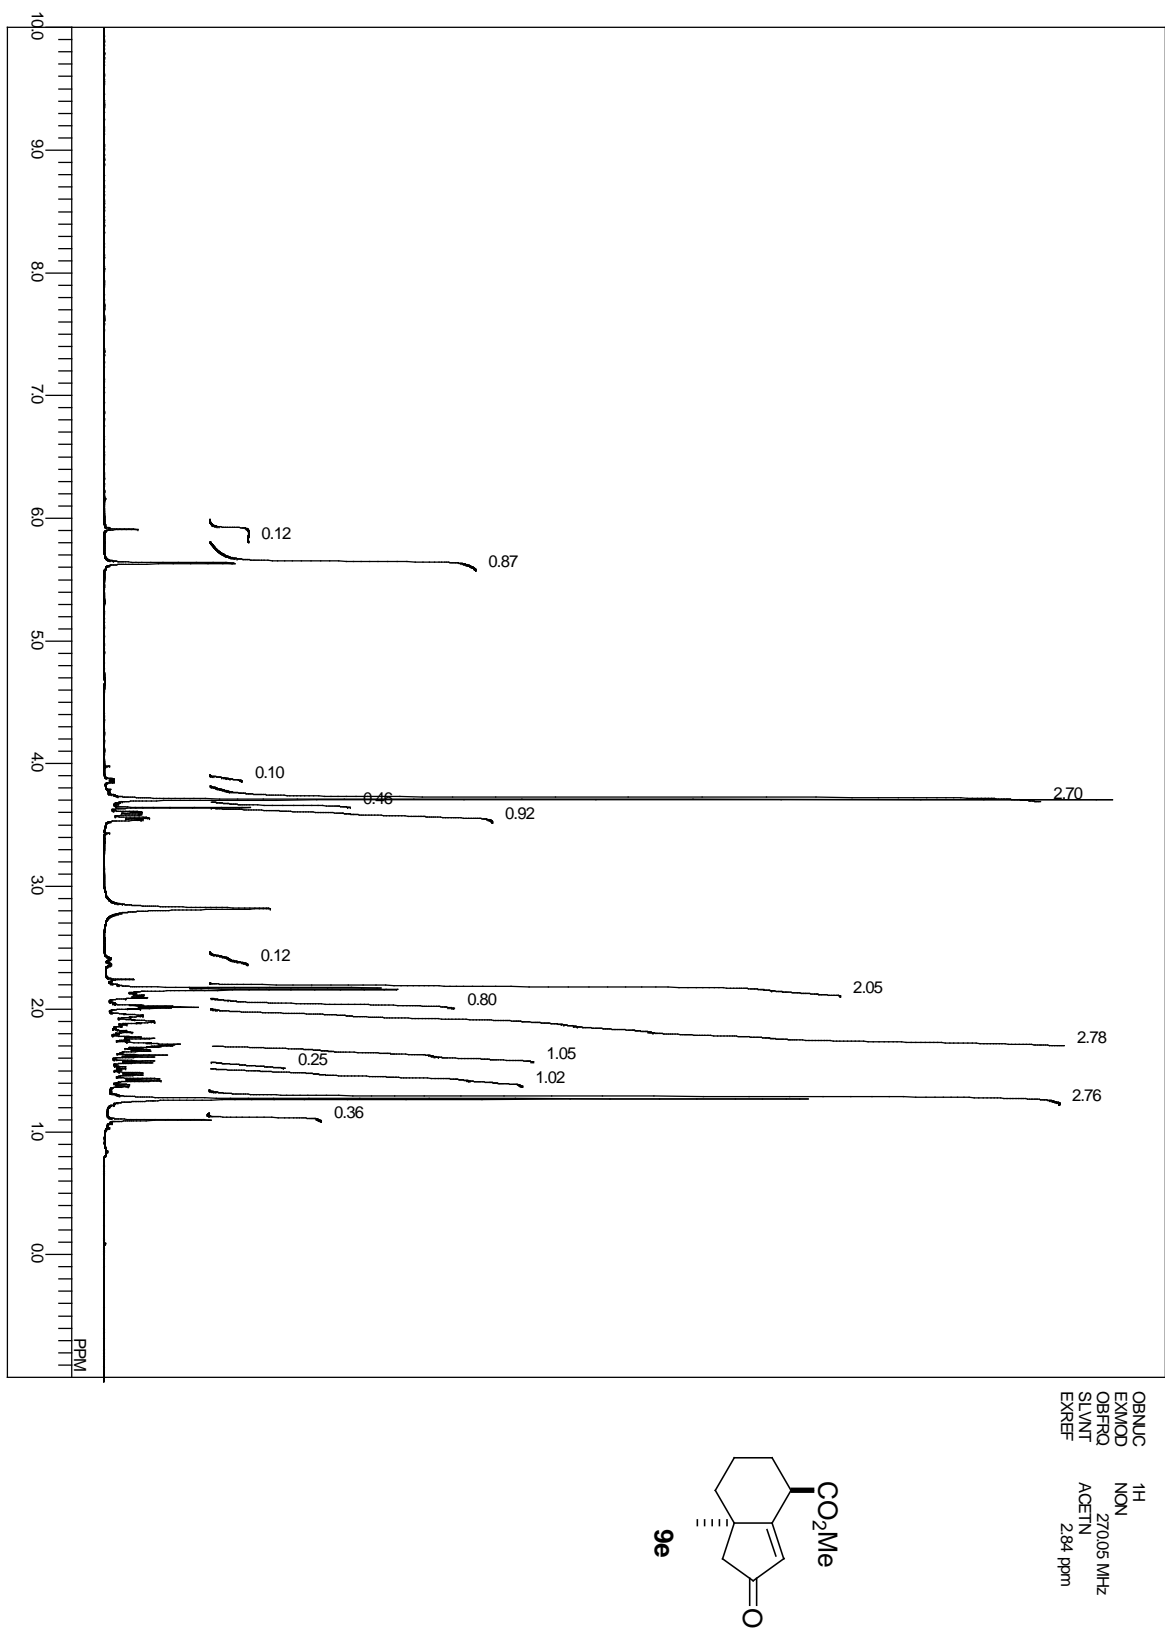



<sup>13</sup>C  
OBNUC EXMOD  
OBFRQ single pulse dec  
SLVNT CDCl<sub>3</sub> 100.53 MHz  
EXREF 77.00 ppm

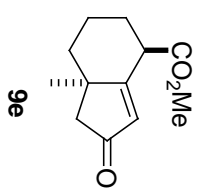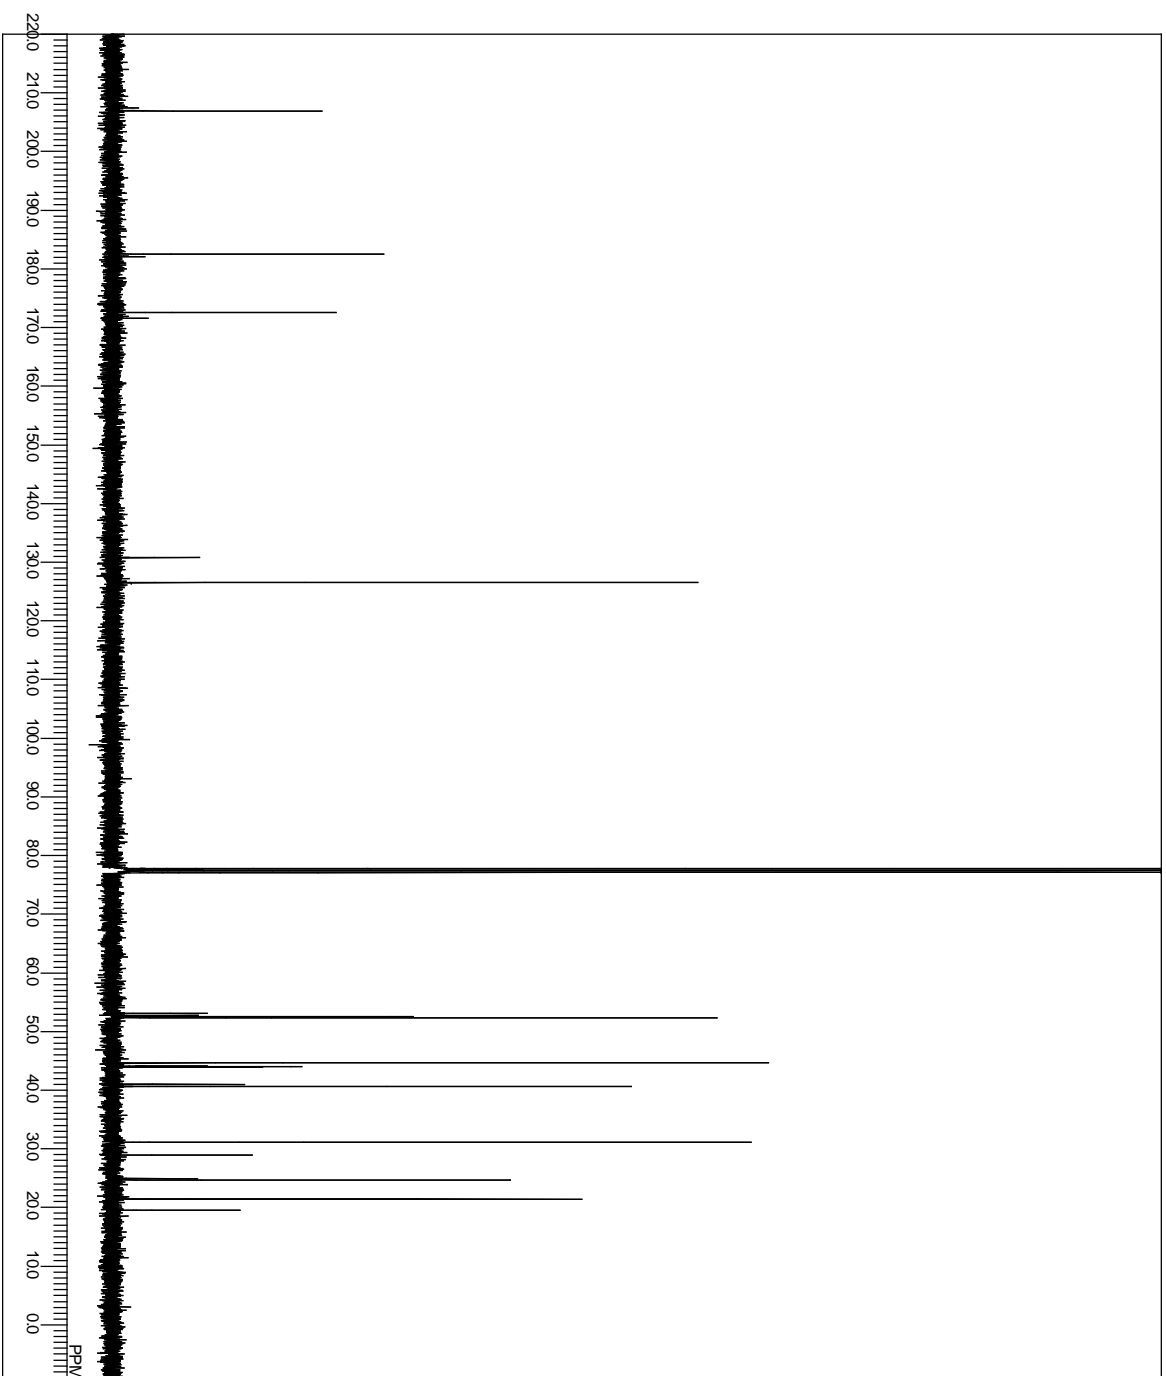

<sup>1</sup>H  
NON  
270.05 MHz  
CDCl<sub>3</sub>  
7.26 ppm

OBNUC  
EXMOD  
OBFRQ  
SLVNT  
EXREF

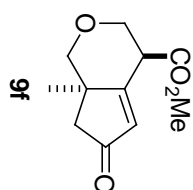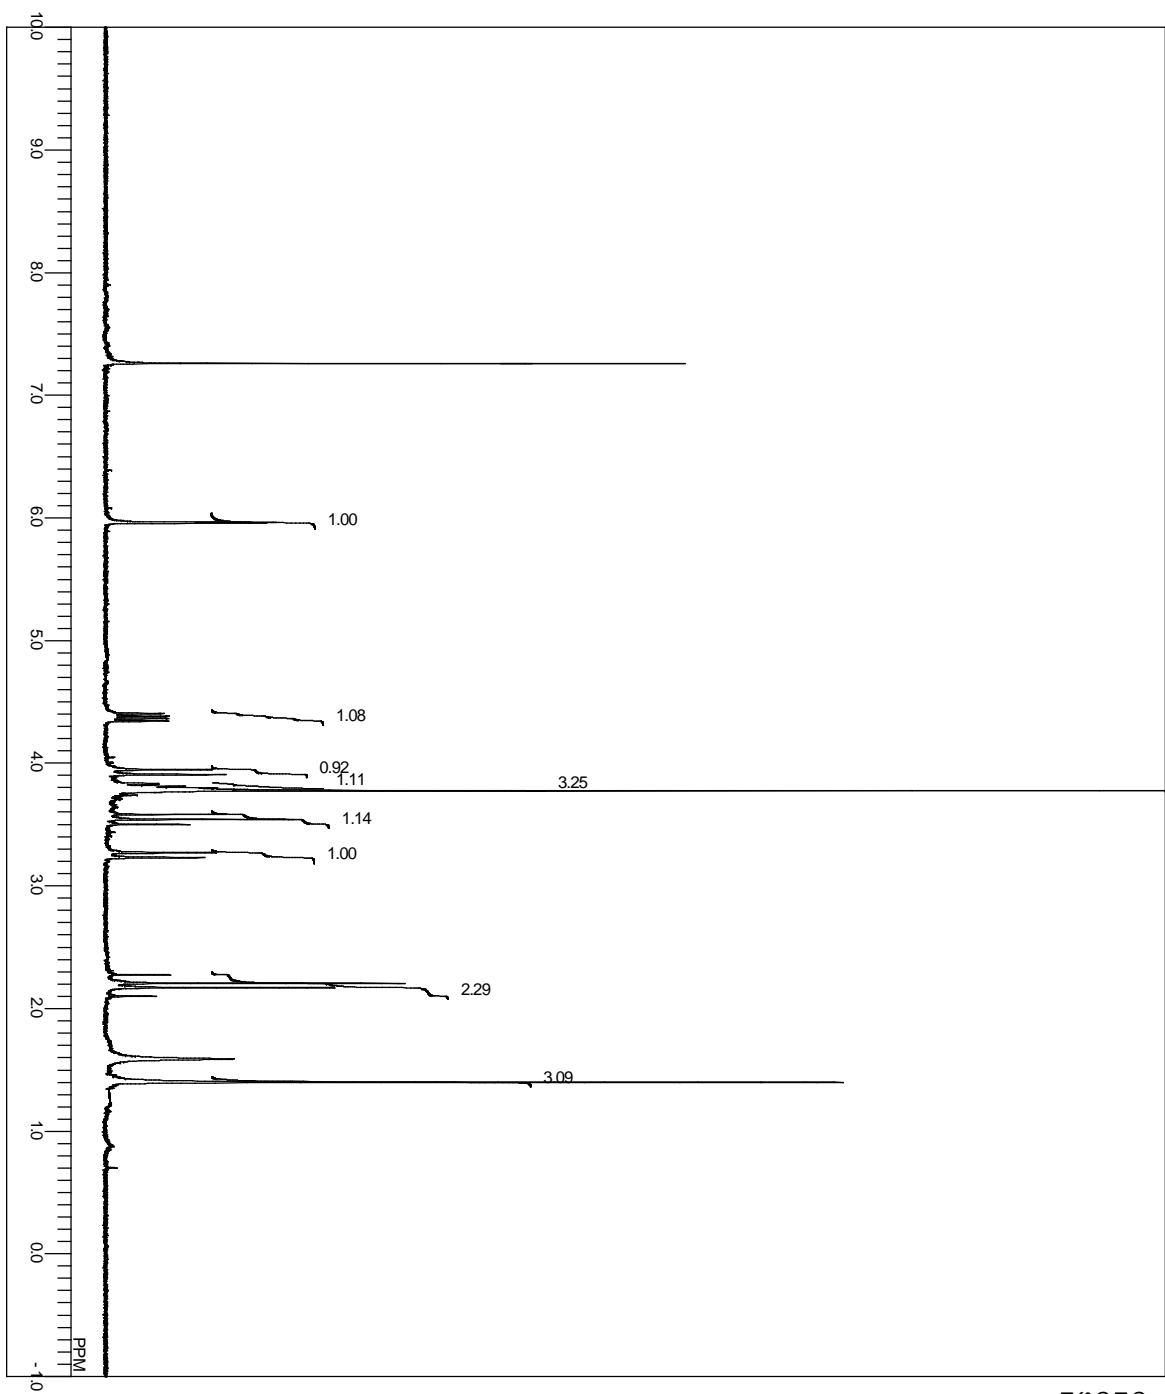

OBNUC <sup>13</sup>C  
EXMOD BCM  
GBFRQ 67.80 MHz  
SLVNT CDCl<sub>3</sub>  
EXREF 77.00 ppm

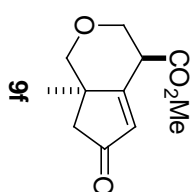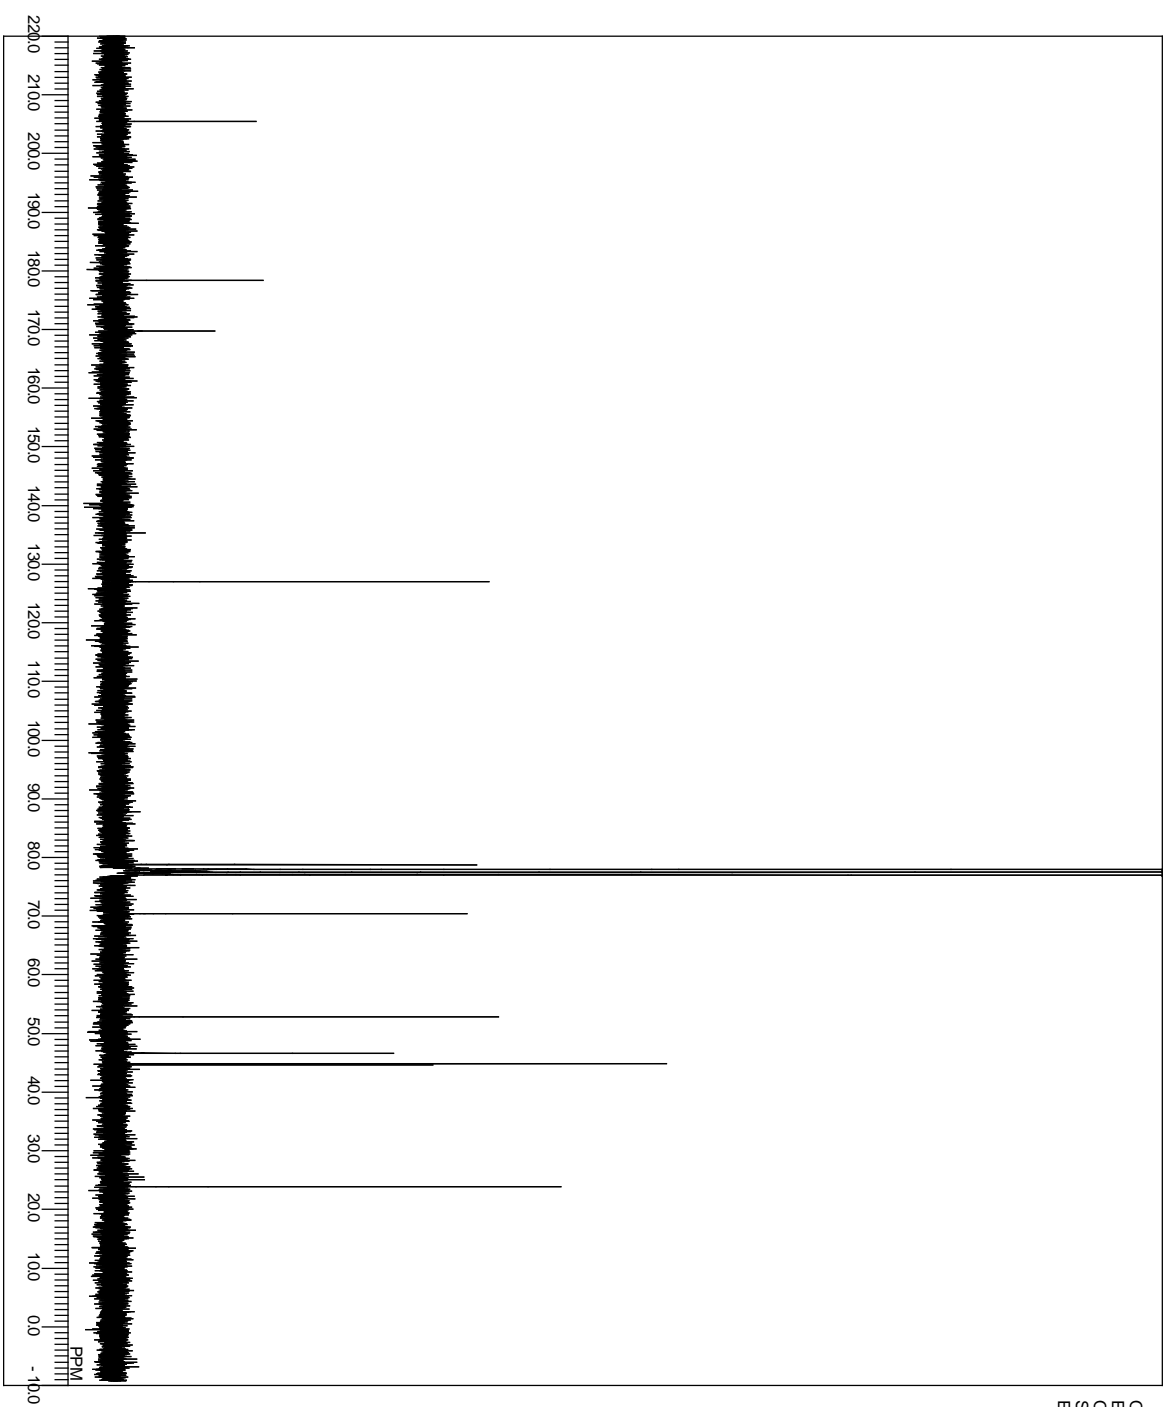

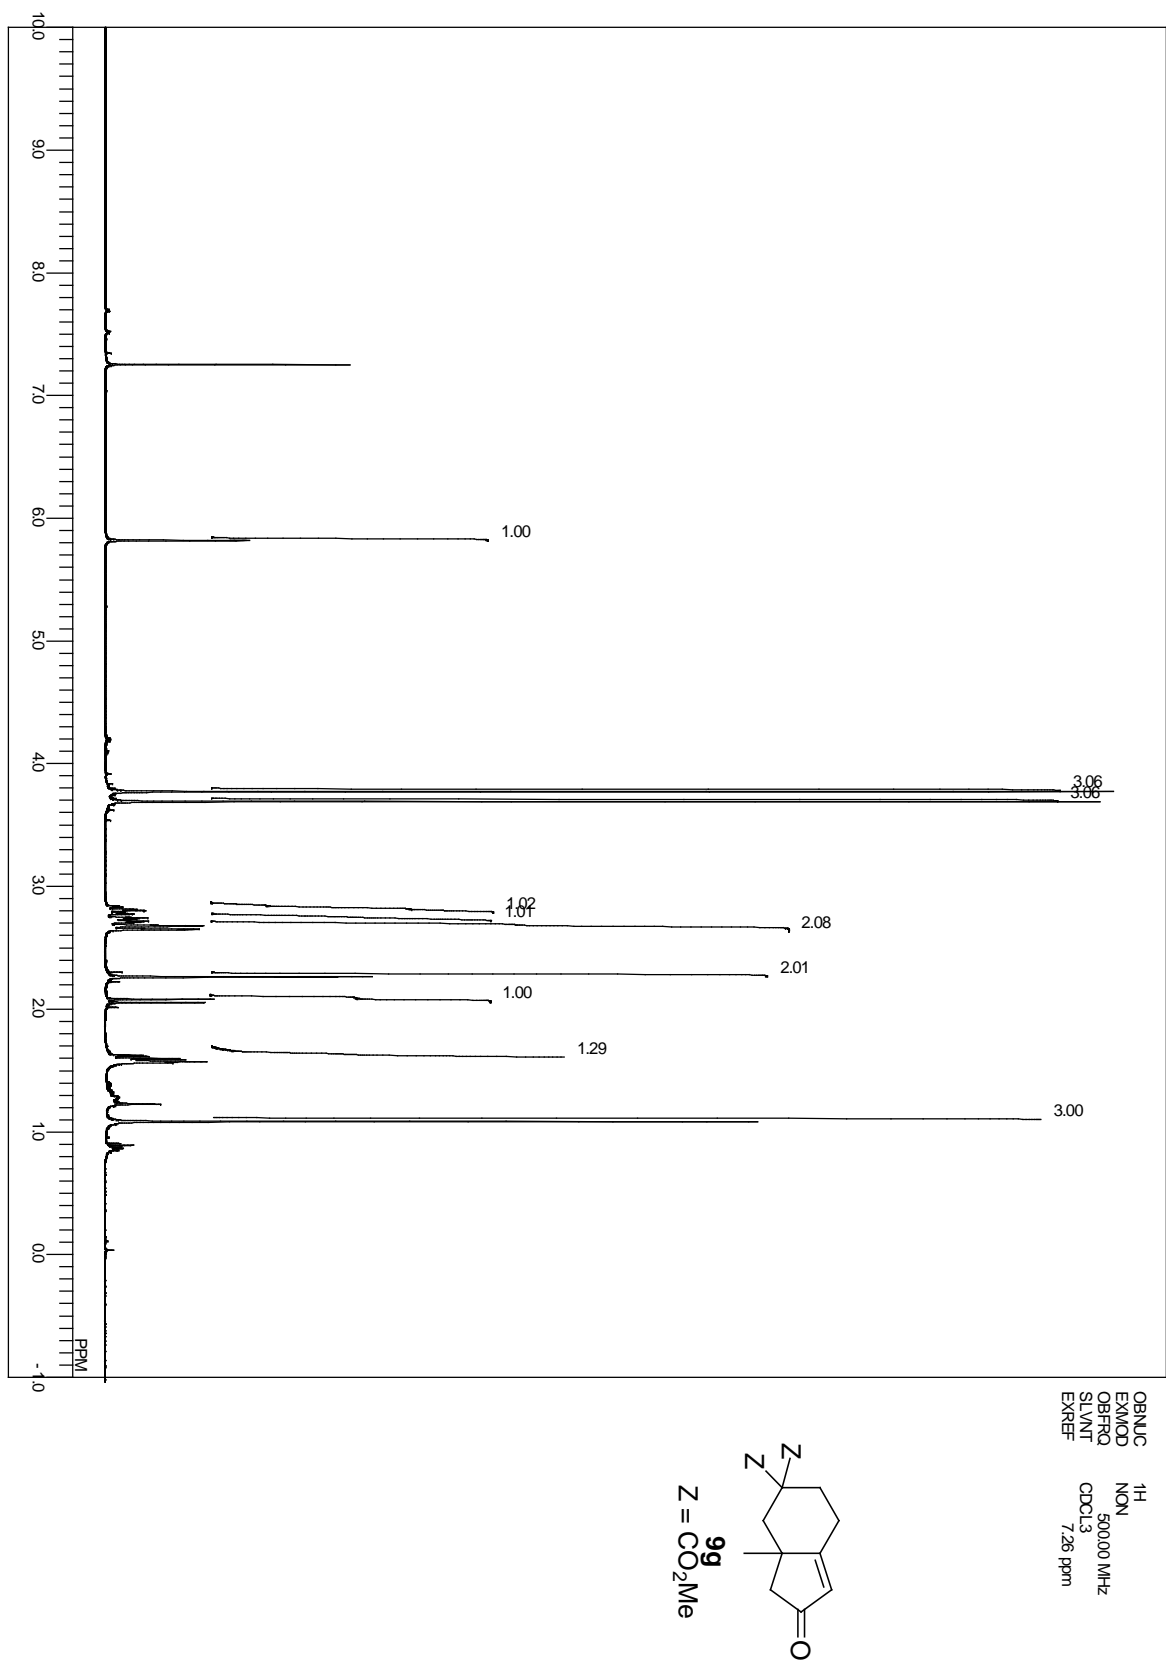

<sup>13</sup>C  
OBNUC EXMCD  
OBFRQ single pulse dec  
SLVNT 100.63 MHz  
CDCL3  
EXREF 77.00 ppm

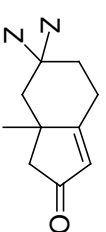

**9g**  
Z = CO<sub>2</sub>Me

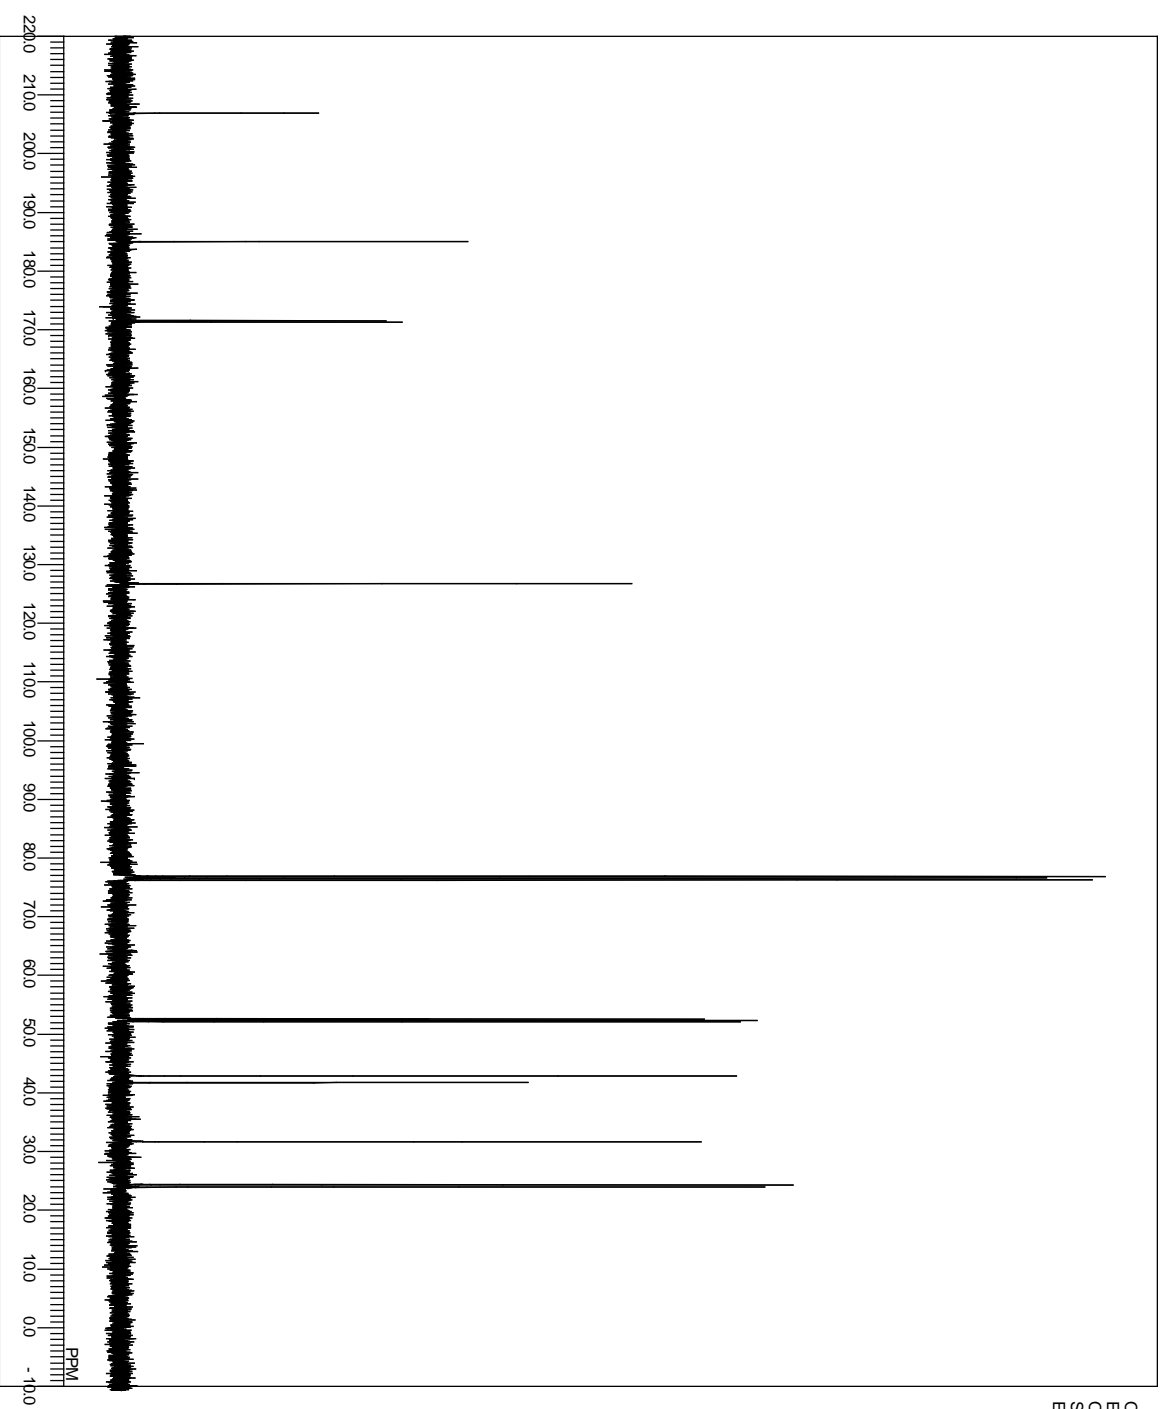

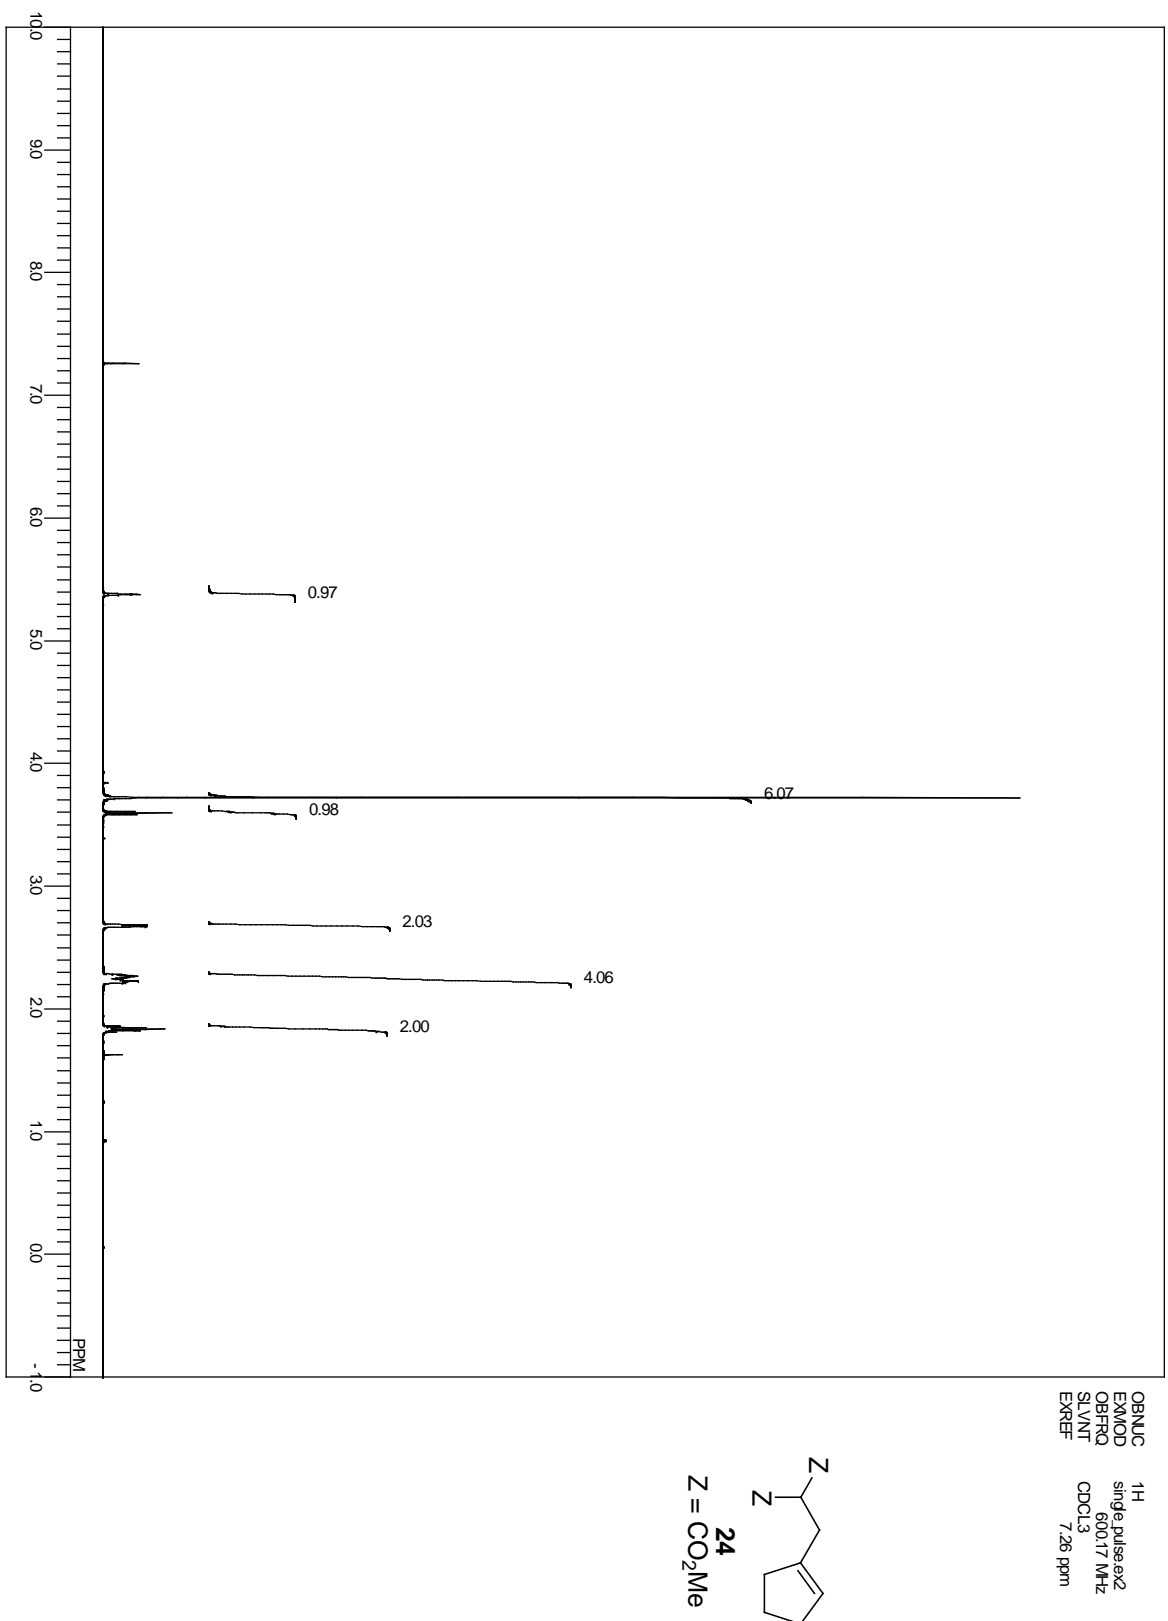

<sup>13</sup>C  
OBNUC EXMOD  
single pulse dec  
150.92 MHz  
CDCl<sub>3</sub>  
77.00 ppm  
EXREF

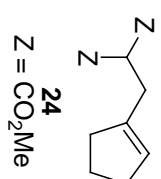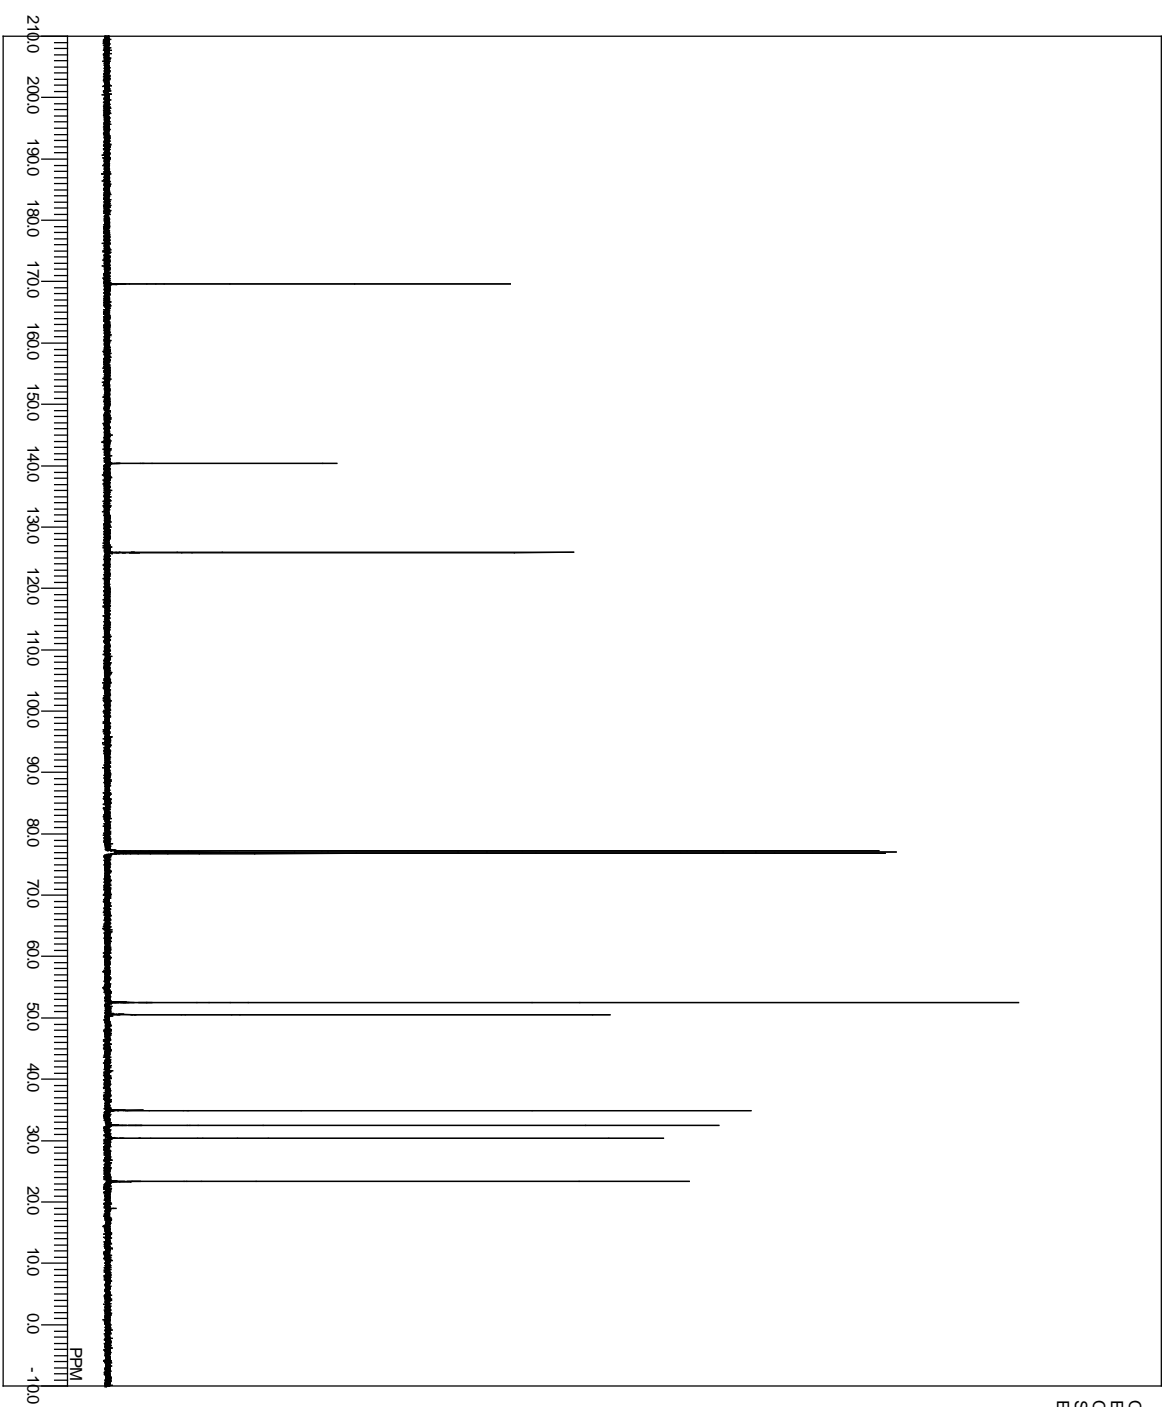

OBNUC  
EXMCD  
OBFRQ  
SLVNT  
EXREF

<sup>1</sup>H  
single pulse ex2  
600.17 MHz  
CDCl3  
0.00 ppm

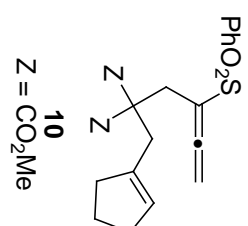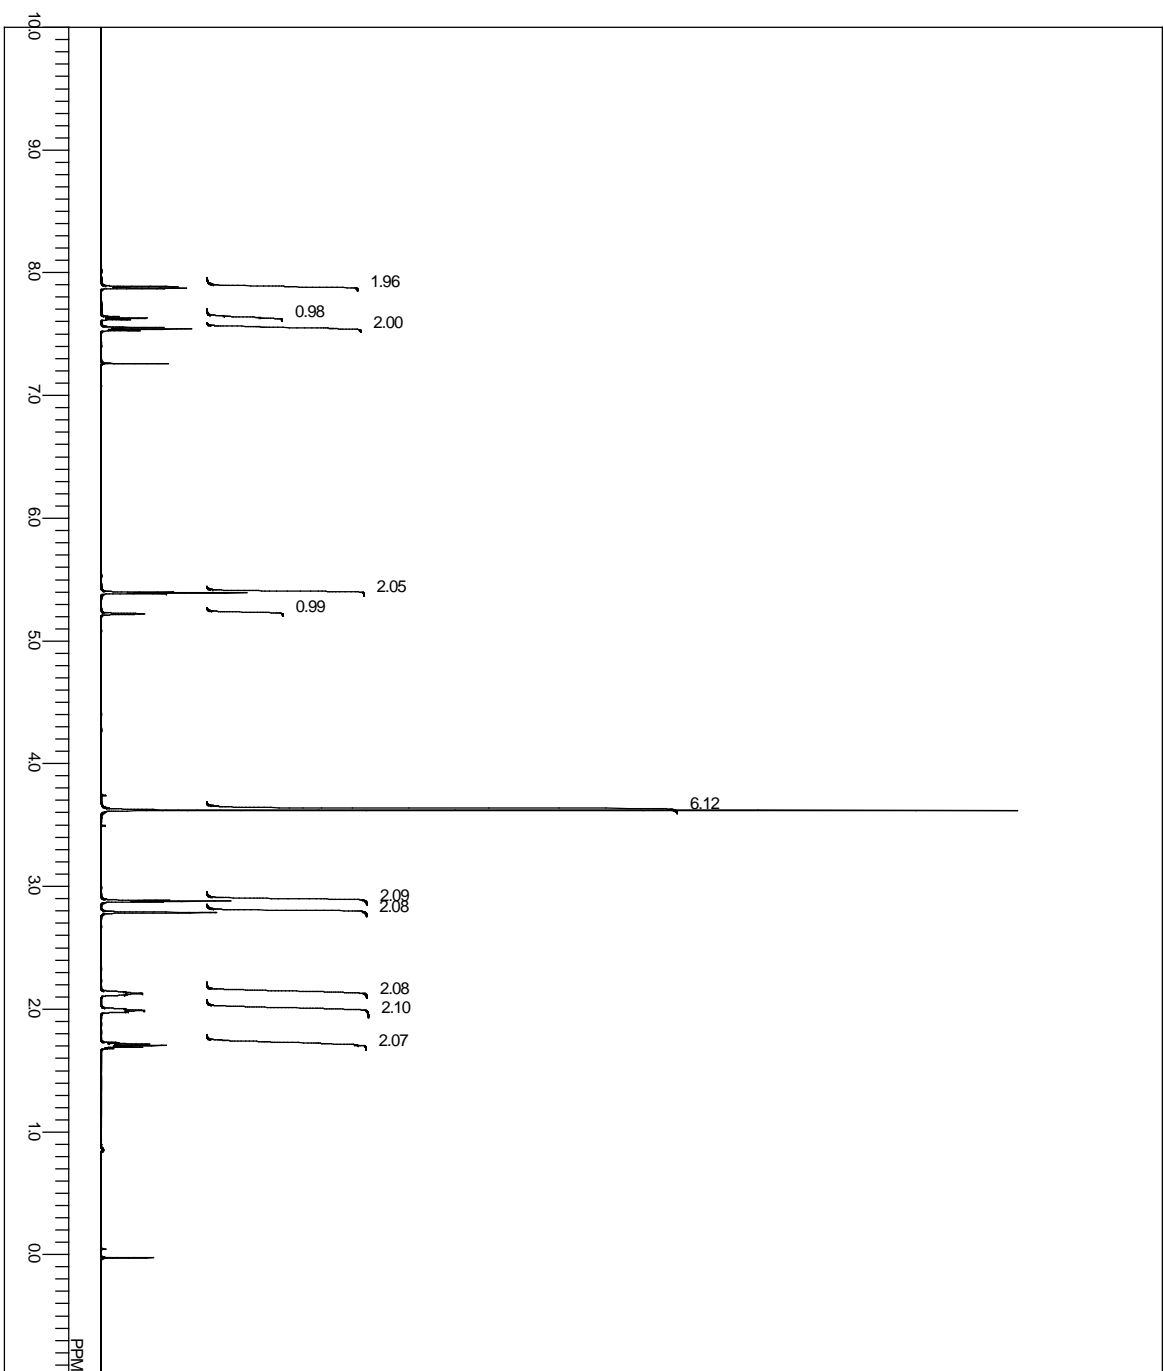



<sup>13</sup>C  
OBNUC EXMCD  
OBFRQ single pulse dec  
SLVNT 150.92 MHz  
CDCL3  
EXREF 77.00 ppm

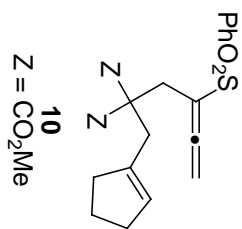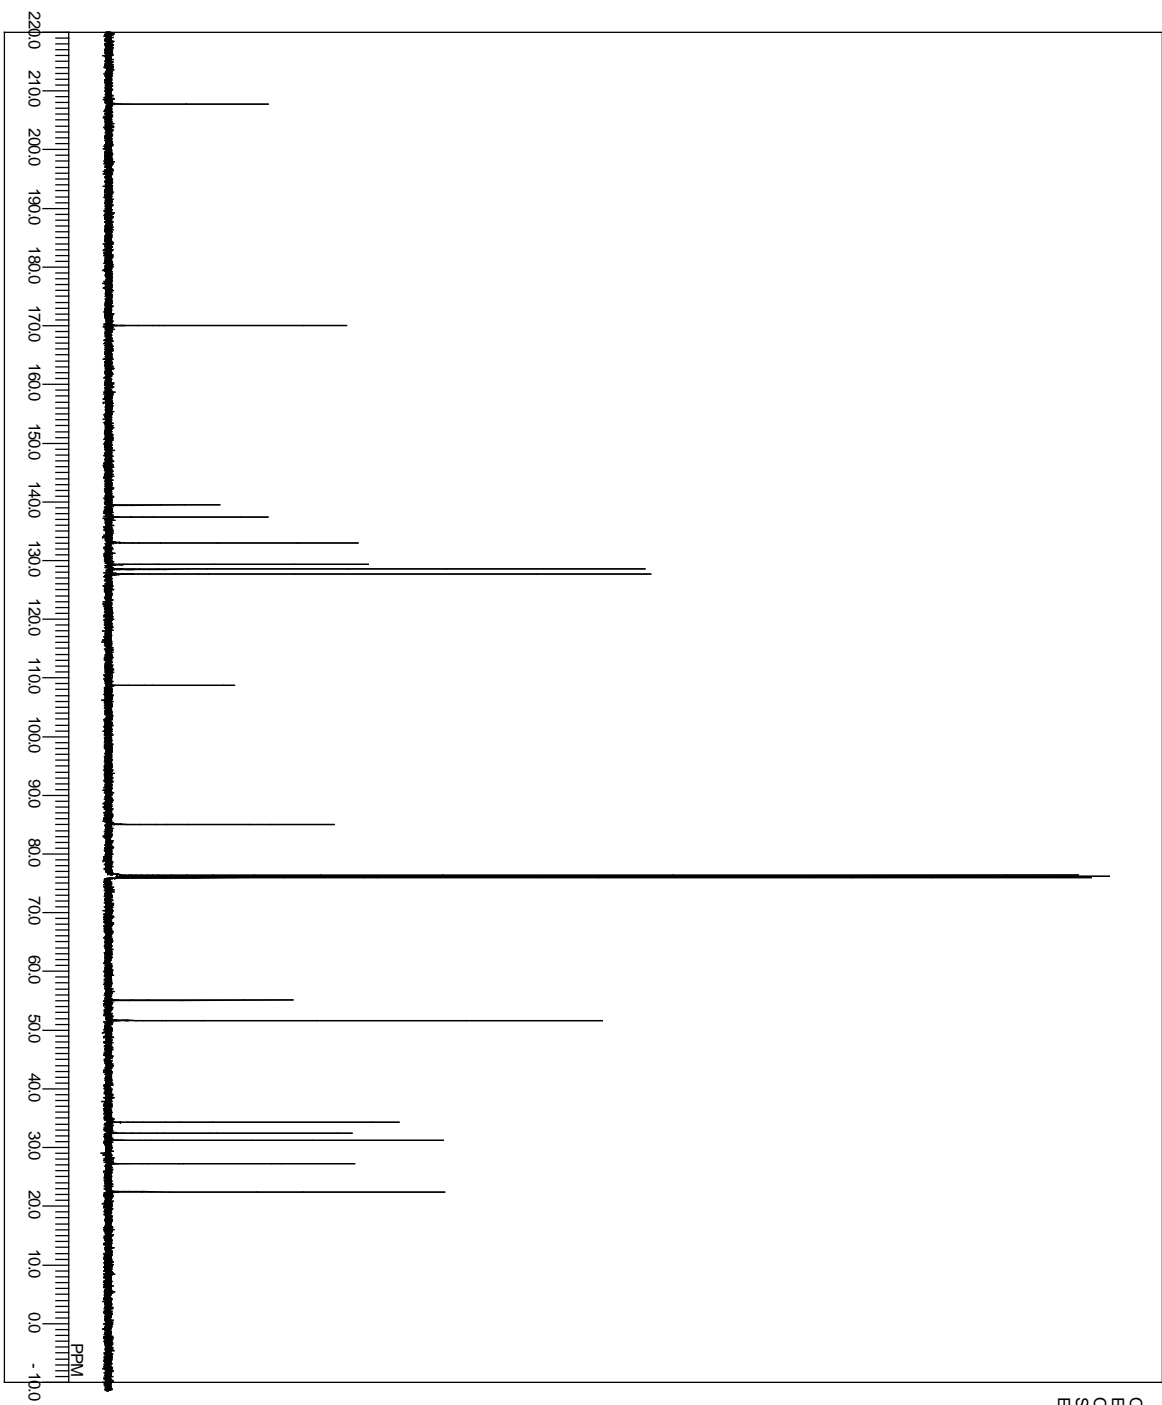

<sup>1</sup>H  
NON  
500.00 MHz  
CDCl<sub>3</sub>  
0.00 ppm

ORNLJC  
EXMCD  
OBFHQ  
SLVNT  
EXREF

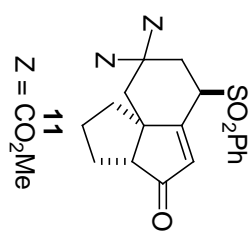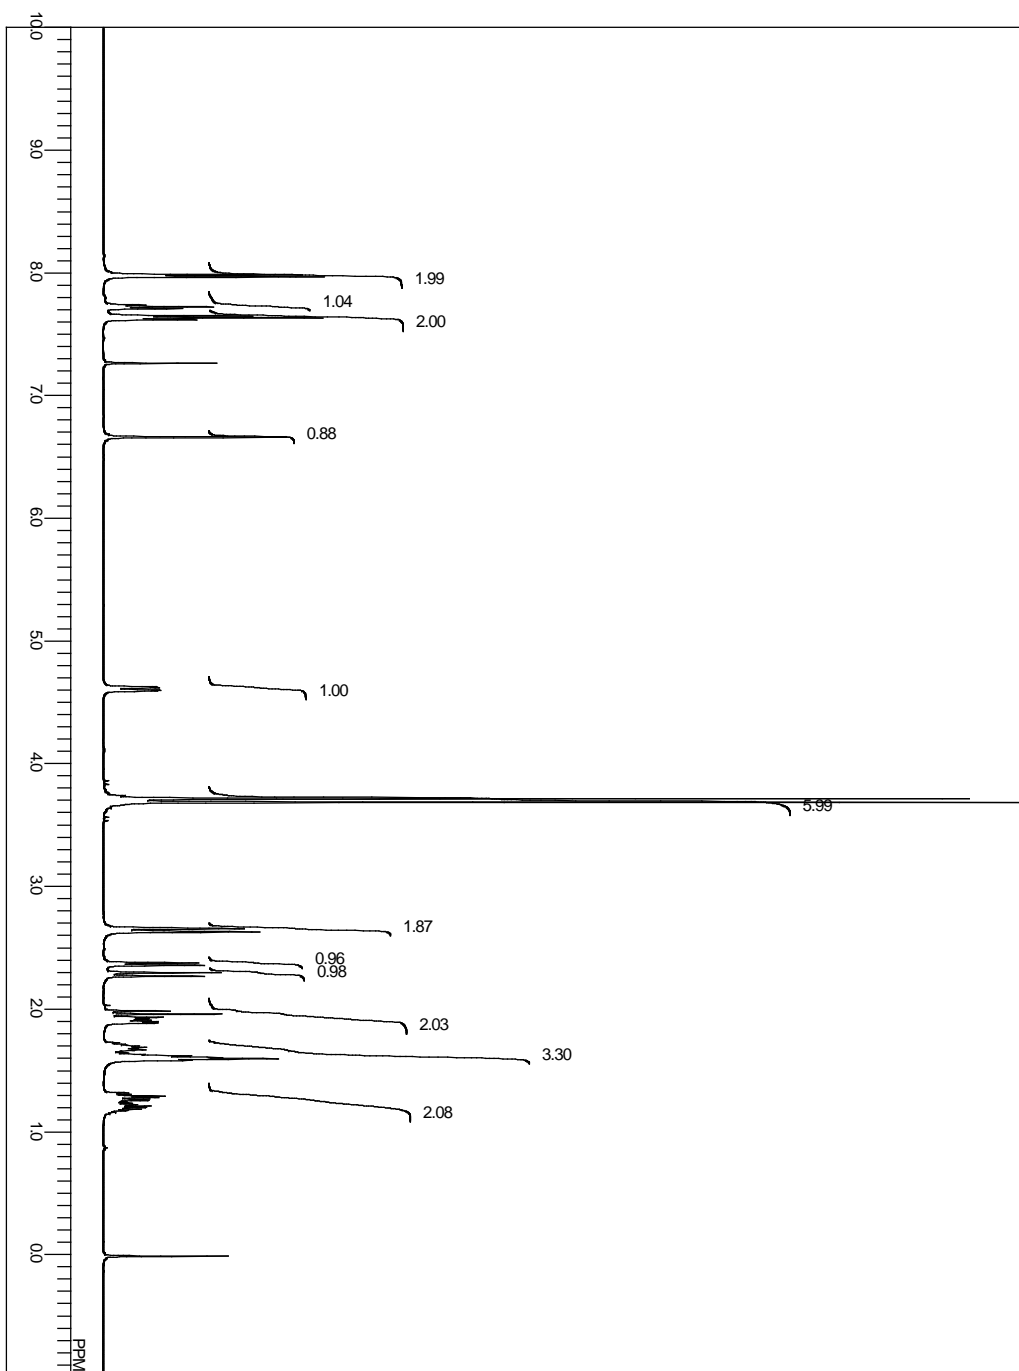

OBNUC <sup>13</sup>C  
EXMCD BOM  
GBFRQ 125.65 MHz  
SLVNT CDCl<sub>3</sub>  
XREF 77.00 ppm

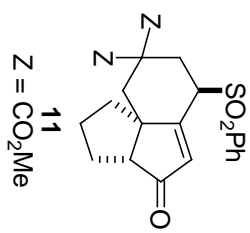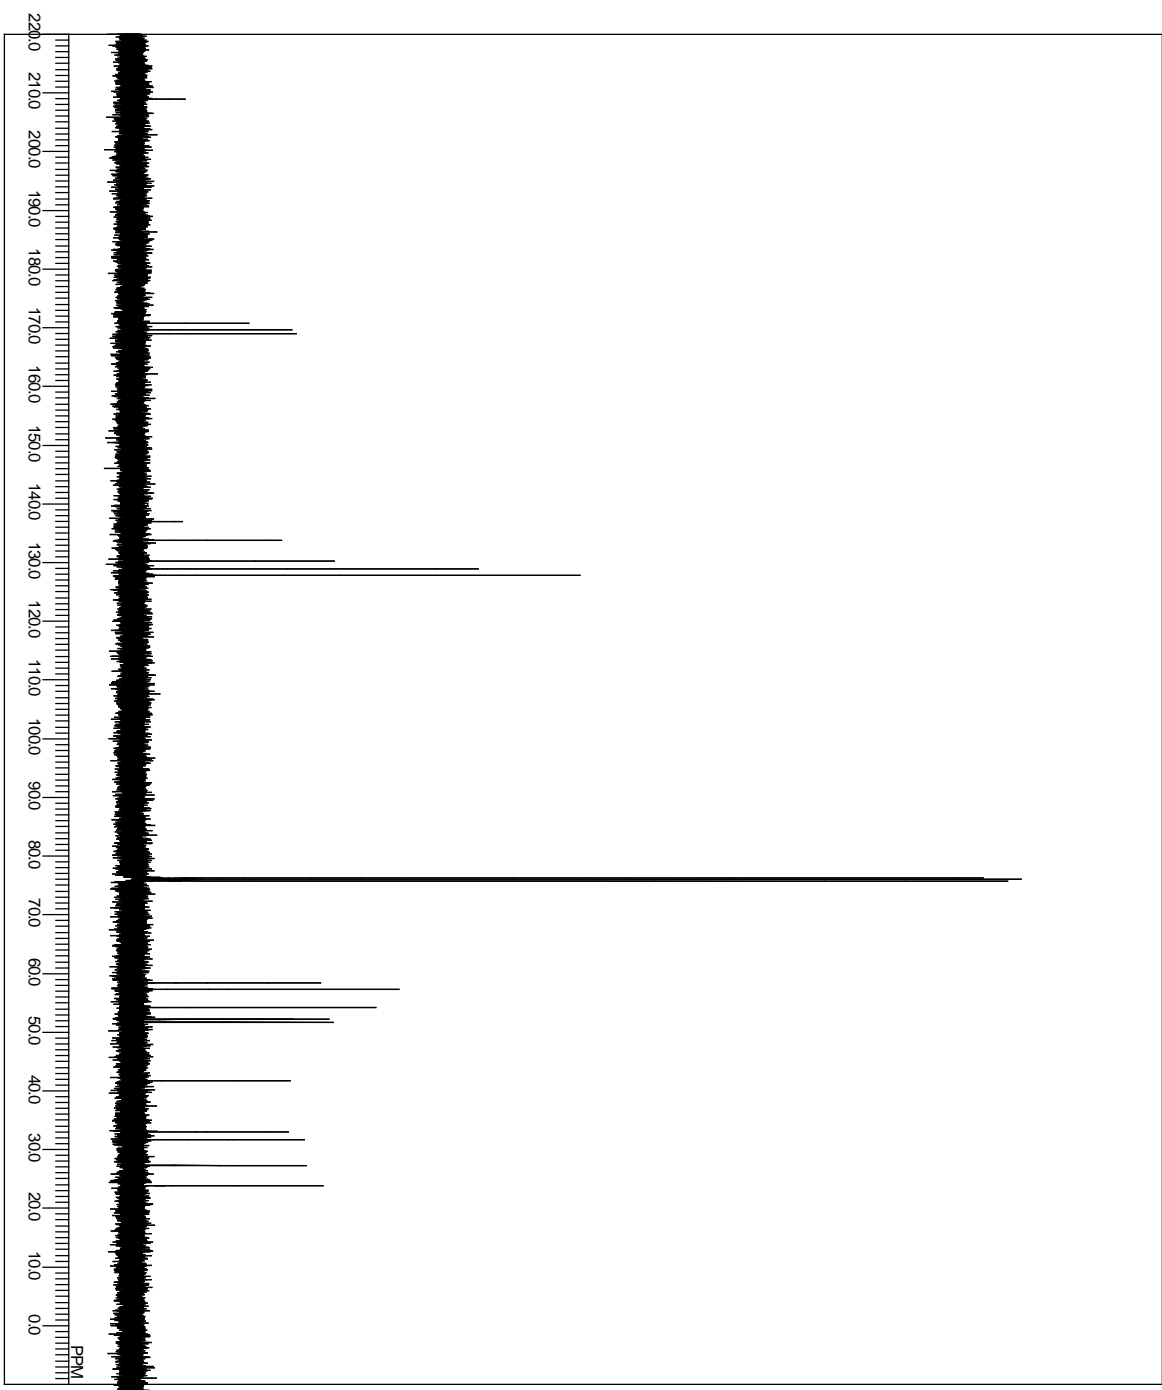

<sup>1</sup>H  
NON  
500.00 MHz  
CDCl<sub>3</sub>  
0.00 ppm

ORNLJC  
EXMCD  
OBFHQ  
SLVNT  
EXREF

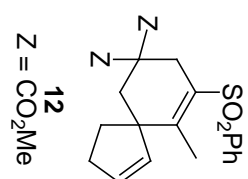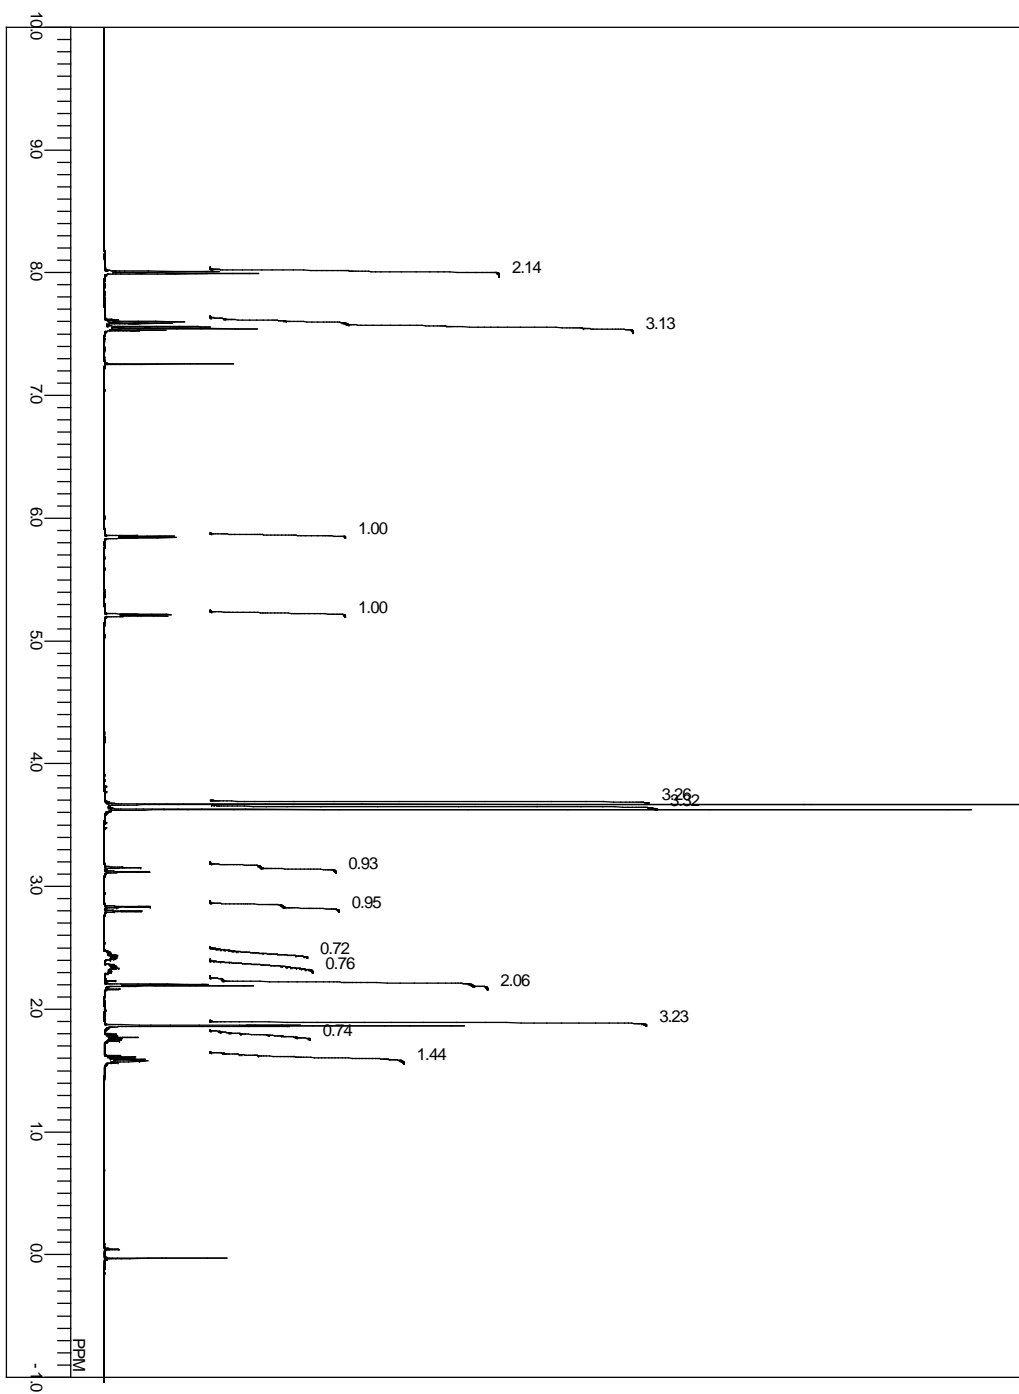

ORNLJC <sup>13</sup>C  
EXMCD BCM  
QBFREQ 125.65 MHz  
SLVNT CDCl<sub>3</sub>  
EXREF 77.00 ppm

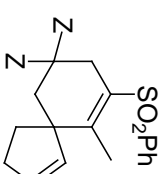

**12**  
Z = CO<sub>2</sub>Me

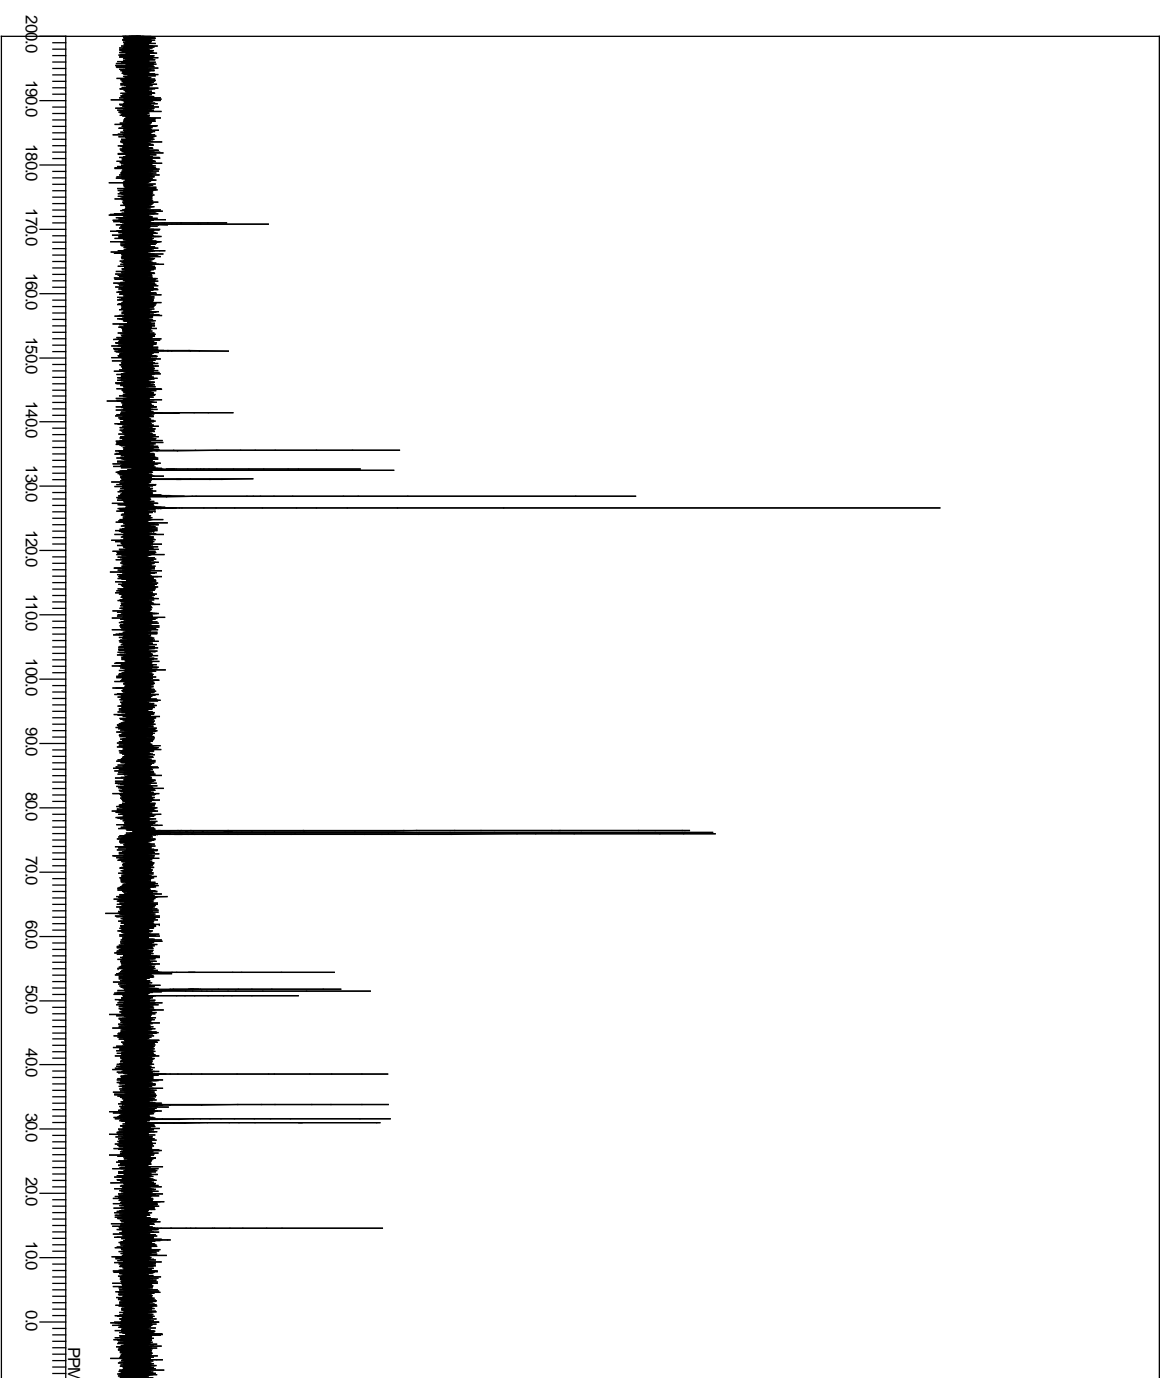

Supplement: Additional file 1 [file 1860-5397-7-52-S1.pdf]
